# Supplementary material for: Effects of therapeutic play on children undergoing cast-removal procedures: a randomised controlled trial
Source: PubMed Central journal article supplement — BMJ Open. 2018 Jul 5;8(7):e021071. doi: 10.1136/bmjopen-2017-021071 (PMC6042539; doi:10.1136/bmjopen-2017-021071), 2018-07-05
Supplement: bmjopen-2017-021071.draft_revisions.pdf [file bmjopen-2017-021071.draft_revisions.pdf]

# BMJ Open

BMJ Open is committed to open peer review. As part of this commitment we make the peer review history of every article we publish publicly available.

When an article is published we post the peer reviewers' comments and the authors' responses online. We also post the versions of the paper that were used during peer review. These are the versions that the peer review comments apply to.

The versions of the paper that follow are the versions that were submitted during the peer review process. They are not the versions of record or the final published versions. They should not be cited or distributed as the published version of this manuscript.

BMJ Open is an open access journal and the full, final, typeset and author-corrected version of record of the manuscript is available on our site with no access controls, subscription charges or pay-per-view fees (<http://bmjopen.bmj.com>).

If you have any questions on BMJ Open's open peer review process please email [info.bmjopen@bmj.com](mailto:info.bmjopen@bmj.com)

# BMJ Open

## Effects of therapeutic play on children undergoing cast-removal procedures: a randomised controlled trial

|                               |                                                                                                                                                                                                                                                                                                                                                                                                                                                                                                                                                                                                                                                     |
|-------------------------------|-----------------------------------------------------------------------------------------------------------------------------------------------------------------------------------------------------------------------------------------------------------------------------------------------------------------------------------------------------------------------------------------------------------------------------------------------------------------------------------------------------------------------------------------------------------------------------------------------------------------------------------------------------|
| Journal:                      | <i>BMJ Open</i>                                                                                                                                                                                                                                                                                                                                                                                                                                                                                                                                                                                                                                     |
| Manuscript ID                 | bmjopen-2017-021071                                                                                                                                                                                                                                                                                                                                                                                                                                                                                                                                                                                                                                 |
| Article Type:                 | Research                                                                                                                                                                                                                                                                                                                                                                                                                                                                                                                                                                                                                                            |
| Date Submitted by the Author: | 13-Dec-2017                                                                                                                                                                                                                                                                                                                                                                                                                                                                                                                                                                                                                                         |
| Complete List of Authors:     | Wong, Cho Lee; The Chinese University of Hong Kong, Faculty of Medicine, The Nethersole School of Nursing<br>Ip, Wan Yim; The Chinese University of Hong Kong, Faculty of Medicine, The Nethersole School of Nursing<br>Kwok, Blondi Ming Chau; Playright Children's Play Association<br>Choi, Kai Chow; The Chinese University of Hong Kong, Faculty of Medicine, The Nethersole School of Nursing<br>Ng, Bobby King Wah; The Chinese University of Hong Kong, Faculty of Medicine, Department of Orthopaedics & Traumatology<br>Chan, Carmen Wing Han; The Chinese University of Hong Kong, Faculty of Medicine, The Nethersole School of Nursing |
| Keywords:                     | HEALTH SERVICES ADMINISTRATION & MANAGEMENT, ORTHOPAEDIC & TRAUMA SURGERY, Paediatric orthopaedics < ORTHOPAEDIC & TRAUMA SURGERY                                                                                                                                                                                                                                                                                                                                                                                                                                                                                                                   |
|                               |                                                                                                                                                                                                                                                                                                                                                                                                                                                                                                                                                                                                                                                     |

SCHOLARONE™  
Manuscripts

Only

1  
2  
3  
4 **Title: Effects of therapeutic play on children undergoing cast-removal procedures: a**  
5  
6  
7 **randomised controlled trial**  
8  
9

10  
11 **Authors:**

12 Wong CL, Ip WY, Kwok BMC, Choi KC, Ng BKW, Chan CWH.  
13  
14

15  
16  
17 **Authors' information:**  
18

19 Correspondence to CL Wong:  
20

21 Cho Lee Wong  
22

23 PhD, RN  
24

25 Assistant Professor  
26

27 The Nethersole School of Nursing, Faculty of Medicine, The Chinese University of Hong Kong,  
28

29 Hong Kong, China  
30

31 Room 824, Esther Lee Building, The Chinese University of Hong Kong, Hong Kong.  
32

33 Telephone number: (852) 3943 8166  
34

35 Fax number: (852) 2603 5269  
36

37 Email: [jojowong@cuhk.edu.hk](mailto:jojowong@cuhk.edu.hk)  
38  
39

40  
41  
42  
43  
44 Wan Yim Ip

45 PhD, RN  
46

47 Associate Professor (Retired)  
48

49 The Nethersole School of Nursing, Faculty of Medicine, The Chinese University of Hong Kong,  
50

51 Hong Kong, China  
52

53 Email: [wanyimip@cuhk.edu.hk](mailto:wanyimip@cuhk.edu.hk)  
54  
55

1  
2  
3  
4  
5  
6 Kwok Blondi Ming Chau  
7

8 BN, RN  
9

10 Manager (Community & Hospital)  
11

12 Playright Children's Play Association, Hong Kong, China  
13

14 Email: [blondi@playright.org.hk](mailto:blondi@playright.org.hk)  
15  
16  
17  
18

19 Kai Chow Choi  
20

21 PhD  
22

23 Senior Research Fellow  
24

25 The Nethersole School of Nursing, Faculty of Medicine, The Chinese University of Hong Kong,  
26

27 Hong Kong, China  
28

29 Email: [kchoi@cuhk.edu.hk](mailto:kchoi@cuhk.edu.hk)  
30  
31  
32  
33  
34

35 Bobby King Wah Ng  
36

37 M.D.  
38

39 Clinical Professional Consultant of Orthopaedics & Traumatology  
40

41 Department of Orthopaedics & Traumatology, Faculty of Medicine, The Chinese University of  
42

43 Hong Kong, Hong Kong, China  
44

45 Email: [bobng@ort.cuhk.edu.hk](mailto:bobng@ort.cuhk.edu.hk)  
46  
47  
48  
49  
50

51 Carmen Wing Han Chan  
52

53 PhD, RN  
54

55 Vice-Director of Education / Professor  
56  
57  
58  
59  
60

1  
2  
3  
4 The Nethersole School of Nursing, Faculty of Medicine, The Chinese University of Hong Kong,  
5  
6 Hong Kong, China  
7  
8 Email: [whchan@cuhk.edu.hk](mailto:whchan@cuhk.edu.hk)  
9

10  
11  
12 **Keywords**  
13

14 cast-removal, randomized controlled trial, therapeutic play  
15  
16

17  
18  
19 **Word count**  
20

21 4,106  
22  
23  
24  
25  
26  
27  
28  
29  
30  
31  
32  
33  
34  
35  
36  
37  
38  
39  
40  
41  
42  
43  
44  
45  
46  
47  
48  
49  
50  
51  
52  
53  
54  
55  
56  
57  
58  
59  
60

For peer review only

## Abstract

**Objectives:** To examine (i) the effectiveness of therapeutic play in reducing anxiety and negative emotional manifestations among children undergoing cast-removal procedures; (ii) the satisfaction of parents and cast technicians with cast-removal procedures.

**Design:** A randomised controlled trial.

**Setting:** An orthopaedic outpatient department of a regional teaching hospital in Hong Kong.

**Participants:** Children (n=208) aged 3-12 undergoing cast removal procedure were invited to participate.

**Interventions:** Eligible children were randomly allocated to either the intervention (n=103) or control group (n=105). The intervention group received therapeutic play intervention, whereas the control group received standard care only. Participants were assessed on three occasions: before, during, and after completion of the cast removal procedure.

**Outcome measures:** Children's anxiety level, emotional manifestation, and heart rate. The satisfaction ratings of parents and cast technicians with respect to therapeutic play intervention were also examined.

**Results:** Children aged 3-8 in the intervention group demonstrated a statistically significant reduction in anxiety levels ( $p=0.01$ ) and exhibited fewer negative emotional manifestations ( $p<0.001$ ) than the control group. Parents and technicians in the intervention group also reported a higher level of satisfaction ( $p<0.001$ ) with the procedures.

**Conclusion:** Therapeutic play effectively reduces anxiety and negative emotional manifestations among children undergoing cast-removal procedures. The findings highlight the importance of integrating therapeutic play into standard care.

**Trial Registration:** Centre for Clinical Research and Biostatistics: CUHK\_CCT00465.

**Strengths and limitations of this study:**

- This study was one of the first randomised controlled trial to examine the effects of therapeutic play on children undergo cast-removal procedures, building the evidence base of therapeutic play.
- A limitation was recruiting children from a single clinical setting so that the generalisability of the findings may be restricted.
- The strength of this study included employing both subjective and objective outcome measures to evaluate the impact of therapeutic play on the psychological state of a child.

## Introduction

It is common for children to display stressed behaviour in clinical settings even during painless medical procedures such as cast removal.<sup>1 2</sup> The original injuries sustained by the children, added to the unfamiliar environment and the equipment used during the procedures, are likely to provoke anxiety and fear in children of any age. The psychological burden on children not only makes the procedures difficult to perform effectively and efficiently, but may also impose medical risks.<sup>1 3</sup> Moreover, anxiety in the children also reduces parents' satisfaction with the care provided.<sup>4</sup> Various strategies such as the use of ear protection or musical lullabies have been used but have not proved very effective.<sup>5 6</sup> Other interventions to reduce anxiety levels in children coping with cast removal (CR) procedures should be explored.

Therapeutic play is a set of structured activities designed according to the subject's age, cognitive development and health-related issues, to promote emotional and physical well-being in hospitalised children.<sup>7</sup> Li and colleagues suggested that hospitalised children who engaged in therapeutic play exhibited fewer negative emotions and experienced lower levels of anxiety than those did not.<sup>8</sup> A recent systematic review of 14 articles found that therapeutic play was commonly employed for children undergoing invasive procedures, such elective surgery, vaccination, blood collection or dental treatment in in-patient settings, with positive changes in the behaviour of those who participated in play sessions and a reduction in their anxieties.<sup>9</sup> However, some of these studies were limited by the lack of random assignment of subjects into intervention or control groups. Besides, the efficacy of therapeutic play interventions is yet to be determined, as the studies reported were mainly based on clinical observation and most of the play manuals, which should have set out specific procedures to improve fidelity, were not fully described.<sup>10-12</sup> Objective studies to gather data on the scope of procedures are clearly necessary.



1  
2  
3 Moreover, the beneficial effects of therapeutic play on institutions or care providers were seldom  
4 explored.  
5  
6

7  
8 Our literature search revealed no reports of prospective and randomised controlled studies on  
9  
10 therapeutic play among children undergoing cast-removal procedures. The comprehensive value  
11  
12 of therapeutic play in paediatric orthopaedic cast rooms - in their impact on the children, parents  
13  
14 and medical institution as a whole - remains largely unexplored in the literature. This study  
15  
16 aimed to examine the effectiveness of therapeutic play in reducing anxiety and negative  
17  
18 emotional manifestations among children undergoing cast-removal procedures. The satisfaction  
19  
20 ratings of parents and cast technicians in respect of the cast-removal procedures were also to be  
21  
22 examined.  
23  
24  
25  
26  
27

## 28 **Theoretical Framework**

29  
30 Lazarus and Folkman's theory of stress and coping theory was used to guide this trial.<sup>13</sup> They  
31  
32 suggest that stress is a relationship between a person and the environment that the person finds  
33  
34 taxing or exceeding resources. It is well known that cast-removal procedures is stressful for  
35  
36 children.<sup>1,2</sup> Children likely feel stress and anxiety if they perceived a lack of control over the  
37  
38 medical procedure.<sup>8</sup> Therapeutic play works by helping children to prepare for the procedure and  
39  
40 thereby assist them to regain a sense of self-control to cope with the procedure.<sup>13, 14</sup> It is  
41  
42 reasoned that children undergoing therapeutic play intervention will be more likely to cope with  
43  
44 cast removal procedures and feel less stress and anxiety.  
45  
46  
47  
48  
49  
50

## 51 **Methods**

### 52 **Design**

1  
2  
3 A two-arm parallel randomised controlled trial was employed.  
4  
5  
6  
7

## 8 **Setting**

9  
10 The study was conducted in the orthopaedic outpatient department (OPD) of a regional  
11 teaching hospital in Hong Kong, where the OPD cast room performs approximately 20 CR  
12 procedures monthly. The standard regimen in this OPD did not include therapeutic play  
13 intervention.  
14  
15  
16  
17  
18  
19  
20

## 21 **Participants**

### 22 *Children*

23  
24 Children and their accompanying parents who were waiting for the cast room procedure were  
25 invited to participate in the study if: (i) the child was 3–12 years of age; and (ii) the parents were  
26 able to speak Cantonese and read Chinese. Children were excluded if they: (i) had had a cast  
27 removed within the previous 3 months; or (ii) had neurological or developmental problems as  
28 shown on the medical record.  
29  
30  
31  
32  
33  
34  
35  
36

37 The rationale for selecting 3–12 year olds was that the number of children having cast room  
38 procedure within this age range in Hong Kong was higher than for other age groups. In fact,  
39 according to Piaget's (1963) theory of cognitive development, children from 3-7 belong to the  
40 same pre-operational stage, while those between 8 -12 belong to the concrete operational stage.<sup>15</sup>  
41 Children in the same age group will be at the same stage of psychosocial development.<sup>16</sup>  
42  
43  
44  
45  
46  
47  
48

49 The sample size of the study was determined to detect an effect size of Cohen's  $d = 0.6$   
50 between the intervention and control groups with reference to previous therapeutic play  
51 studies.<sup>17-18</sup> Forty-four subjects in each group were sufficient to detect an effect of 0.6 with 80%  
52  
53  
54  
55  
56  
57  
58  
59  
60

1  
2  
3 power at 5% level of significance. Taking into account of up to a 20% attrition rate and stratified  
4 the study by age, 53 children each would be recruited for the intervention and control groups per  
5 stratum by age (3–7 & 8–12 years).  
6  
7  
8  
9

### 10 11 12 *Accompany parents and cast technicians*

13  
14  
15 All accompany parents and cast technicians involved in the cast-removal procedures were  
16 invited to assess their satisfaction for the procedures.  
17  
18  
19  
20  
21  
22

### 23 24 **Randomisation**

25  
26 Eligible children undergoing the CR procedure were randomly allocated to the intervention  
27 or control groups in a 1:1 ratio. Randomisation were stratified by the two age groups, 3–7 and 8–  
28 12 years. Serially numbered opaque sealed envelopes containing the grouping identifier  
29 (intervention or control) for each age group were prepared in advance by an independent  
30 statistician using computer-generated random codes. The group allocation of the children  
31 recruited was assigned according to their ages and sequence of enrolment in the study, and the  
32 grouping identifier contained in the corresponding numbered envelopes.  
33  
34  
35  
36  
37  
38  
39  
40  
41  
42  
43

### 44 45 **Control Group: Standard Care**

46  
47 Participants in the control group received standard care without therapeutic play intervention.  
48 Standard care included the nurse explaining why and what would be done and saying comforting  
49 and supportive words during the procedures.  
50  
51  
52  
53

### 54 55 56 **Intervention Group: Therapeutic Play**

1  
2  
3 In addition to the standard care, children in the intervention group also received therapeutic  
4 play intervention. The interventions were conducted by the hospital play specialist (HPS). To  
5 ensure therapeutic play interventions were provided according to the children's needs and  
6 psycho-cognitive development,<sup>15-16</sup> the research team met with the HPS to set up the research  
7 protocol (supplementary file). The content of the therapeutic play had two main components:  
8 preparation and distraction forms of play.<sup>19</sup> The duration of intervention was about 30 minutes.  
9  
10  
11  
12  
13  
14  
15  
16  
17  
18

### 19 *Preparation play*

20  
21 Preparation play was conducted before the CR procedure a. A demonstration of the CR  
22 procedure was conducted using a doll. The demonstration included:  
23  
24

- 25 • Showing a dummy circular-saw cast cutter with appropriate sound effects
- 26 • Playing with a doll and explaining how the cast was cut open by the circular saw
- 27 • Reassuring children that the saw would not cut their skin if they followed the instruction not to  
28 move
- 29 • Explaining that, when the cast was cut, the child might feel vibration or tingling, notice a certain  
30 warmth and see chalky dust flying
- 31 • Describing the use of spreaders and scissors to finish removing the cast
- 32 • Explaining how, after the cast was open, the skin might appear scaly and dirty and the limb feel a  
33 little stiff when first moved; also that the arm or leg might seem light because the cast had been  
34 heavy.

35  
36  
37  
38  
39  
40  
41  
42  
43  
44  
45  
46  
47  
48  
49 During the demonstration, the children were asked to touch and play with the doll and  
50 material, and role-play how they would respond to the procedure after the demonstration. The  
51 preparation play usually took 10–15 minutes to complete.  
52  
53  
54  
55  
56  
57  
58  
59  
60

### ***Distraction play***

Throughout the CR procedure, support was given to children by introducing distraction play. The aim of the distraction play was to divert children's attention away from the medical procedure. Methods of distraction included visual or auditory distraction, deep breathing exercises, tactile stimulation, counting/singing or other verbal interaction. The choice of method depended on the children's choices.<sup>20</sup> The parents' presence and involvement were supported, and the children were praised for any act of successful self-control. The conclusion of the procedure was indicated by offering the children a reward (e.g. stickers).

## **Outcome measures**

### **Visual analogue scale**

A visual analogue scale (VAS) was used to assess the anxiety levels of children between 3 and 7. The VAS consists of a 10-cm horizontal line anchored by the words 'not worried' (low score) at one end and 'very worried' (high score) at the other, with drawings of different facial expressions spaced along the line. Children aged between 3-7 were asked to indicate their levels of anxiety by moving a pointer over the line. As children of 3 or 4 may have limited verbal expression abilities, their parents were also invited to rate the anxiety levels of their children. The VAS is a widely used scale which has been found to be a reliable and valid tool for measuring children's subjective feelings.<sup>21</sup>

### **The short-form Chinese version of the State Anxiety Scale for Children (CSAS-C)**

The CSAS-C is a 10-item self-report scale measuring the anxiety levels of children aged 8-12 in busy clinical setting.<sup>17</sup> It is a three-point Likert scale with total scores ranging from 10 to 30,

1  
2  
3 with higher scores indicating greater anxiety levels.<sup>17</sup> The psychometric properties of the short  
4 form have been tested and found to correlate highly with the scores on the full form ( $r = 0.92$ ),  
5  
6 with good internal consistency ( $r = 0.83$ ) and convergent validity that differentiate the state  
7  
8 anxiety of children in various situations. Factorial structure of the short form was also checked  
9  
10 using exploratory and confirmatory analyses.<sup>22</sup> The Cronbach's alpha of the scale in this study  
11  
12 was 0.80 to 0.88.<sup>23-24</sup>  
13  
14  
15  
16  
17  
18

### 19 **Children's Emotional Manifestation Scale (CEMS)**

20  
21 The emotional behaviour of children during CR procedures was documented by using the  
22  
23 CEMS, developed by Li and Lopez in 2005. It comprises five observable emotional forms of  
24  
25 behaviour, categorised as 'facial expression', 'vocalisation', 'activity', 'interaction' and 'level of  
26  
27 co-operation'. The CEMS score is obtained by reviewing the descriptions of behaviour in each  
28  
29 category and selecting the number that most closely represents the behaviour observed at the  
30  
31 time the subject experiences the most distress. Each category is scored from one to five.  
32  
33 Observable forms of behaviour in each category of the CEMS are explained in detail with an  
34  
35 operational definition, so that the observer, a research nurse in this study, using the scale has  
36  
37 relatively clear-cut criteria for assessment. The sum of the numbers obtained for each category is  
38  
39 the total score, which will be between 5-25, higher scores indicating the manifestation of more  
40  
41 negative (distressed) emotional behaviour. The evaluation of the psychometric properties of the  
42  
43 CEMS demonstrated adequate reliability and validity.<sup>25</sup> The Cronbach's alpha of the scale in this  
44  
45 study was 0.86.<sup>23-24</sup>  
46  
47  
48  
49  
50  
51  
52  
53

### 54 **Satisfaction scale for parent and cast technician**

1  
2  
3 Two questionnaires in English, developed by Tyson and colleagues (2014),<sup>12</sup> were adopted to  
4 measure parents' and cast technicians' satisfaction levels. The original questionnaire for parents is  
5 a 10-item scale to measure their satisfaction with the child life services. Each item is rated on a  
6 five-point scale ranging from 1 = strongly disagree - 5 = strongly agree, higher scores indicating  
7 higher levels of satisfaction. Example of the statement used is 'My child's emotional needs were  
8 met'. The perception of the cast technician was examined by eight items, with each being rated  
9 on a scale from 1 = strongly disagree - 5 = strongly agree. Example of the statement used is 'the  
10 child engaged in distraction'. The researcher translated the questionnaire into Chinese, using the  
11 back-translation method recommended by Brislin (1986).<sup>26</sup> The translated version was reviewed  
12 by a panel of expert professionals for semantic and content equivalence. The scale level of  
13 semantic equivalence for the parents' satisfaction and cast technician satisfaction was 95% and  
14 92%, respectively, indicating that the translated version was a correct reflection of the original  
15 version.<sup>27</sup> The CVI of the parent's satisfaction level scale was 0.90 and cast technician's  
16 satisfaction level scale was 0.94, indicating the content of the translated scale were equivalent to  
17 the original version. The Cronbach's alpha of both scales in this study was 0.90.  
18  
19  
20  
21  
22  
23  
24  
25  
26  
27  
28  
29  
30  
31  
32  
33  
34  
35  
36  
37  
38  
39

### 40 **Heart rate monitoring**

41  
42 A standard automatic heart rate monitoring machine, available in the study hospital, was used  
43 to measure children's heart rates to assess their physiological responses to CR procedures.  
44 Children's heart rates have been considered objective and definitive indicators for an indirect  
45 assessment of children's anxiety levels in previous studies.<sup>28</sup>  
46  
47  
48  
49  
50  
51  
52  
53

### 54 **A demographic sheet**

1  
2  
3 The socio-demographic and clinical variables of parents and children were collected. The  
4 items for children include age, sex, reason for cast application and number of hospital admissions.  
5  
6 The accompany parent's age, sex, educational level and working status was also obtained. The  
7  
8 cast technician's demographic information, including age, sex and years of work experience, was  
9  
10 also collected by the research nurse.  
11  
12  
13  
14  
15  
16

### 17 **Data collection**

18  
19 Children having their casts removed were identified outside the cast room of the study OPD  
20 by a research nurse. Permission for a child meeting the recruitment criteria to participate was  
21 obtained from the accompanying parent. The research nurse conducted the interview with  
22  
23 consenting parent-child pairs in a private room. The children in both groups were asked to  
24  
25 indicate how anxious they were by completing either the VAS anxiety scale (for children  
26  
27 between 3–7 years old) or the short form of the CSAS-C (for children aged between 8–12).<sup>17</sup>  
28  
29 The rearch nurse obtained demographic and clinical data from the parents. She also asked the  
30  
31 parents of children aged under 5 to use the VAS scale to indicate their child's perceived anxiety  
32  
33 level. Children's heart rates were also monitored for one minute at the end of the interview, using  
34  
35 a standard automatic monitor.  
36  
37  
38  
39  
40  
41

42 According to the subject allocation scheme, children in the control group received standard  
43 care in CR room A, while the intervention group additionally received a therapeutic play  
44  
45 intervention conducted by the HPS in CR room B. The parents and children were asked during  
46  
47 the informed consent process not to discuss the purpose of the study with cast technicians in the  
48  
49 cast room.  
50  
51  
52  
53  
54  
55  
56  
57  
58  
59  
60



1  
2  
3 In the CR room, the research nurse took two one-minute recordings of the child's heart rate:  
4 (1) when the cast technician started sawing the cast; and (2) immediately after the cast had been  
5 removed. The research nurse then rated the child's signs of distress from the time the saw  
6 touched the cast until the limb was free of it, by means of the CEMS.<sup>25</sup> She also recorded the  
7 length of the whole CR procedure for each child. After the CR procedure, the research nurse  
8 asked the parents and the cast technician to fill in their respective satisfaction scales to reflect  
9 their perceptions of how the CR procedure had been delivered. The children were asked to recall  
10 their level of anxiety throughout the procedure by filling in either the VAS anxiety scale (for  
11 those between 3-7) or the short form of the CSAS-C (for those between 8-12).<sup>17</sup> Parents were  
12 asked to rate the VAS scale for children under 5.  
13  
14  
15  
16  
17  
18  
19  
20  
21  
22  
23  
24  
25  
26  
27

## 28 **Data analysis**

29  
30 All data were analysed by means of IBM SPSS for Windows, Version 22. Descriptive  
31 statistics were used to present the participants' socio-demographics and outcome measurements.  
32  
33 Pearson's chi-squared test and the student's *t*-test were used as appropriate to compare baseline  
34 differences between the two groups. A generalised estimating equations (GEE) model was used  
35 to compare the outcome measures across time between the two groups. The model accounts for  
36 intra-correlated repeated measures data and accommodates missing data, provided it is missing at  
37 random. All statistical analyses were two-sided, with the level of significance set at 0.05.  
38  
39  
40  
41  
42  
43  
44  
45  
46  
47  
48

## 49 **Results**

### 50 **Demographic and clinical characteristics of the children and their families**

51  
52  
53  
54  
55  
56  
57  
58  
59  
60

1  
2  
3 From August 2015 - January 2017, a total of 209 patients and their accompanying parents  
4 were screened and approached. However, one of them declined to participate in the study  
5 because they were in a hurry and had to leave the clinic at once after the procedure. Therefore, a  
6 total of 208 participants and their accompany parents were recruited. Of these, 105 were  
7 allocated to the control group and 103 to the intervention group (Figure 1). Their mean ages were  
8 7.7 (SD 3.0) and 7.5 (SD 2.9), respectively. There was no significant difference in the  
9 demographic or clinical characteristics of the two groups ( $p>0.05$ ) (Table 1).  
10  
11  
12  
13  
14  
15  
16  
17  
18  
19  
20

## 21 **Anxiety levels**

### 22 *Children aged between 3 and 7*

23  
24 The mean anxiety scores of children aged 3-7 in the intervention group decreased from 35.4  
25 to 27.6 after the CR procedures. By contrast, the anxiety levels of children who did not take part  
26 in therapeutic play increased from 34.0-46.3. Statistically significant differences ( $p=0.010$ ) were  
27 noted between the two groups (Table 2).  
28  
29  
30  
31  
32  
33  
34

35 Accompanying parent(s) with children under 5 were invited to rate the anxiety levels of their  
36 children using VAS. The results showed that there were statistically moderate to high  
37 correlations between the children and their parent's rating before ( $r = 0.36$ ) and after the CR  
38 procedure ( $r = 0.50$ ).  
39  
40  
41  
42  
43  
44  
45  
46

### 47 *Children aged between 8 and 12*

48  
49 The anxiety scores of children in the intervention group fell from 18.0-15.3, and in the  
50 control group from 17.4-15.9. However, no statistically significant difference was noted between  
51 the two groups ( $p=0.171$ ) (Table 2).  
52  
53  
54  
55  
56  
57  
58  
59  
60

### **Emotional manifestation during cast-removal procedures**

The mean emotional manifestation scores of the intervention group were 7.6 (SD 2.4) and of the control group 9.7 (SD 3.9). Statistically significant differences ( $p < 0.001$ ) were found between the two groups, indicating that the intervention group exhibited fewer negative emotional manifestations during the CR procedures (Table 2).

### **Changes in heart rate**

A trend of increasing heart rate was noted before and during the CR procedures for both comparative groups. The mean heart rate of the intervention and control groups increased by 2.6 and 8.4 beats/minute, respectively. Significant differences were noted between the two groups ( $p = 0.008$ ), indicating that the intervention group experienced lower levels of anxiety than the control group (Table 2).

### **Satisfaction levels of parents and cast technicians**

Significantly higher satisfaction scores ( $p < 0.001$ ) were noted by parents of the intervention group (46.6, SD 5.1) and the control group (42.6, SD 6.9), as well as by the CR technician with the intervention (34.3, SD 3.6) and control groups (31.7, SD 4.3) (Table 2).

### **Duration of procedure**

Although the mean time (in minutes) taken to perform the CR procedure was shorter in the intervention 4.1 (SD 2.3) than in the control group 4.6 (SD 2.2), no statistically significant difference was noted between the two (Table 2).

## Discussion

This study expanded previous studies and examined the effects of a therapeutic play intervention on CR procedures in patients, parents and institutions. A randomised controlled design was employed such that the cause and effect relationships among variables could be established.<sup>27</sup> Findings suggest that therapeutic play effectively assists children aged 3-7 to cope with stressful CR procedures and reduces their anxiety levels. Moreover, children who received the intervention exhibited significantly fewer negative emotional manifestations than those who did not.

Most children in this study presented some degree of anxiety before the procedures, the use of a saw and the fluctuating level of high-frequency noise probably accounting for most of the anxiety.<sup>1 29</sup> Previous studies employed ear protection<sup>5</sup> or lullaby-type music<sup>6</sup> to reduce anxiety in children during CR, while heart rate and mean arterial blood pressure were used as physiological outcome indicators of anxiety, respectively. However, no significant difference was noted in these parameters in either study.

The positive results of the present study are further supported by the fact that the mean increase in heart rates before and during the procedure was lower in the intervention than in the control group. A possible explanation may be that the therapeutic play assisted children to cope with an unfamiliar procedure. During the play session, the HPS explained and simulated the CR procedures, which allowed the children to understand them. As the children were familiarised with the procedure, they would expect it to generate noise but not pain. These preparations assisted the children in such a way that they had an enhanced sense of control over the procedure, minimising the adverse effects of the experience.<sup>6</sup> As suitable and age-appropriate distraction were provided to the intervention group, the children's attention was diverted from the anxiety-

1  
2  
3 provoking procedure to playful interaction. They therefore exhibited less negative emotional  
4  
5 behaviour. However, children without any distraction might have focused on the whole  
6  
7 procedure and thus exhibited more negative emotions and increased anxiety levels, even after it  
8  
9 was all over.  
10

11  
12 Nevertheless, although children of 8-12 in the intervention group had larger reductions in  
13  
14 their anxiety scores than those in the control group after the procedure, the difference between  
15  
16 the groups was non-significant. The results were in conflict with those of a previous study  
17  
18 suggesting that older hospitalised children benefit more from the play intervention.<sup>21 30</sup> One  
19  
20 possible explanation for the non-significant findings is that older children have a better  
21  
22 understanding of CR procedures than younger children. According to Piaget (1963),<sup>15</sup> children  
23  
24 of 8–12 can mentally manipulate information to solve problems. As they may have obtained  
25  
26 information about the CR procedure from other sources, such as books, the internet or friends,  
27  
28 they might feel less anxious about the forthcoming procedure. Moreover, compared with younger  
29  
30 children, older children probably have better coping strategies and better control of their  
31  
32 emotions, even in stressful situations. Nevertheless, further study is needed to determine other  
33  
34 effective methods for children at this developmental stage.  
35  
36  
37  
38

39  
40 Consistent with a previous study,<sup>31</sup> the result indicated that parents of children in the  
41  
42 intervention group were more satisfied with the care and play intervention than those of children  
43  
44 receiving standard care only. The satisfaction of parents in the intervention group is likely to  
45  
46 have increased because they also experienced the positive influence of play on their children,  
47  
48 particularly the reduction in anxiety and improved cooperation with the procedure.<sup>32</sup> The  
49  
50 positive correlations in the VAS ratings of children under 5 further suggested that parents also  
51  
52 perceived their children to be less anxious after the intervention.  
53  
54  
55  
56  
57  
58  
59  
60

1  
2  
3 Some cast technicians might have concerns that the CR procedures would be impeded and  
4 prolonged because the play intervention was implemented at the same time. However, the  
5 findings suggest that the duration of the entire procedure was shorter in the intervention than in  
6 the control group, although the differences were non-significant. Nevertheless, the duration in  
7 the intervention group did decrease, probably because the children were psychologically  
8 prepared and were thus more cooperative. In fact, children who are less anxious are easier to  
9 manage in clinical situations,<sup>33</sup> which may account for the increased satisfaction of CR  
10 technicians in procedures assisted by HPS.  
11  
12  
13  
14  
15  
16  
17  
18  
19  
20  
21  
22  
23

### 24 **Limitations**

25  
26 The results of the current study should be interpreted in the light of several limitations. First,  
27 children were recruited from a single clinical setting. The generalisability of the findings may  
28 therefore be restricted. Second, neither patients nor outcome assessors were blinded to the study.  
29 However, because of the very nature of the intervention, blinding of patients and outcome  
30 assessors would have been difficult, and the lack of blinding would not necessarily contribute to  
31 a source of bias because children are unlikely to change their behaviour even when they know  
32 they are participating in a certain intervention.<sup>9</sup> Moreover, different strategies were employed to  
33 minimise the potential bias. For example, children were assigned to different cast rooms and  
34 isolated from other patients at the time of the intervention, regardless of whether or not they were  
35 randomised to the play intervention group. Also, subjective and objective outcome measures  
36 were used to evaluate the impact of therapeutic play on the psychological state of a child.  
37  
38  
39  
40  
41  
42  
43  
44  
45  
46  
47  
48  
49  
50  
51  
52  
53

### 54 **Conclusions**

1  
2  
3 This study confirms the findings of previous work that children experience some degree of  
4 anxiety and exhibit negative emotional manifestations during medical procedures. The  
5 consequences of stress appear to be substantial, and thus the importance of assisting children to  
6 cope effectively with it and reduce its impact is highlighted. A gap in the literature is addressed  
7 by providing empirical evidence on the benefits of therapeutic play for children, family and  
8 medical institution during CR procedures. The findings show that a play intervention effectively  
9 reduces anxiety levels and negative emotional manifestations among children undergoing CR  
10 procedures. Such positive outcomes also translate into an improvement in the satisfaction levels  
11 of parents and CR technicians with the procedures. Play is universal and similar intervention can  
12 be adopted in other settings or medical procedures. The findings highlight the importance of  
13 providing and integrating therapeutic play into standard care. Such an intervention ensures that  
14 holistic and quality care is provided to ease the psychological burden of the patients.  
15 Furthermore, it contributes to improve patient care, satisfaction and overall experience of  
16 children and their families.  
17  
18  
19  
20  
21  
22  
23  
24  
25  
26  
27  
28  
29  
30  
31  
32  
33

### 34 **Acknowledgements**

35 We would like to express our sincere gratitude for the generous support of Kuenflower  
36 Management Inc. (in honour of Kwong Sik Kwan and Kwong Hui May Kuen) given to the UBS  
37 Optimus Foundation in sponsorship for this project.  
38  
39  
40  
41  
42  
43  
44  
45  
46  
47  
48  
49  
50  
51  
52  
53  
54  
55  
56  
57  
58  
59  
60

## References

1. Katz K, Fogelman R, Attias J, *et al.* Anxiety reaction in children during removal of their plaster cast with a saw. *J Bone Joint Surg* 2001;**83**:388-90.
2. Mahan ST, Harris MS, Lierhaus AM, *et al.* Noise reduction to reduce patient anxiety during cast removal: can we decrease patient anxiety with cast removal by wearing noise reduction headphones during cast saw use? *Orthop Nurs* 2017;**36**:271-78.
3. Sanders MB, Starr AJ, Frawley WH, *et al.* Posttraumatic stress symptoms in children recovering from minor orthopaedic injury and treatment. *J Orthop Trauma* 2005;**19**:623-8.
4. He HG, Zhu LX, Chan WC, *et al.* A mixed-method study of effects of a therapeutic play intervention for children on parental anxiety and parents' perceptions of the intervention. *J Adv Nurs* 2015;**71**:1539-51.
5. Carmichael KD, Westmoreland J. Effectiveness of ear protection in reducing anxiety during cast removal in children. *Am J Orthop* 2005;**34**:43-6.
6. Liu RW, Mehta P, Fortuna S, *et al.* A randomized prospective study of music therapy for reducing anxiety during cast room procedures. *J Pediatr Orthop* 2007;**27**:831-33.
7. Vessey JA, Mahon MM. Therapeutic play and the hospitalized child. *J Pediatr Nurs* 1990;**5**:328-33.
8. Li WH, Chung JO, Ho KY, *et al.* Play interventions to reduce anxiety and negative emotions in hospitalized children. *BMC Pediatr* 2016;**11**:16-36.
9. Silva RD, Austregésilo SC, Ithamar L, *et al.* Therapeutic play to prepare children for invasive procedures: a systematic review. *J Pediatr (Rio J)* 2017;**93**:6-16.
10. Brewer S, Gleditsch SL, Syblik D, *et al.* Pediatric anxiety: child life intervention in day surgery. *J Pediatr Nurs* 2006;**21**:13-22.



11. Stevenson MD, Bivins CM, O'Brien K, *et al.* Child life intervention during angiocatheter insertion in the pediatric emergency department. *Pediatr Emerg Care* 2005;**21**:712–18.
12. Tyson ME, Bohl DD, Blickman JG. *A randomized controlled trial: Child life services in paediatric imaging.* Springer-Verlag, 2014.
13. Lazarus RS, Folkman S. *Stress, Appraisal and Coping.* New York: Springer, 1984.
14. Li HC, Chung OK, Ho KY, *et al.* Coping strategies used by children hospitalized with cancer: an exploratory study. *Psychooncology* 2011;**20**:969-76.
15. Piaget J. *The origins of intelligence in children.* New York: Norton, 1963.
16. Erikson E. *Childhood and society.* 2nd edn. New York: Norton & Company, 1963.
17. Li HCW, Lopez V. Development and validation of a short form of the Chinese version of the State Anxiety Scale for Children. *Int J Nurs Stud* 2007;**44**:566–73.
18. He HG, Zhu L, Chan SW, *et al.* Therapeutic play intervention on children's perioperative anxiety, negative emotional manifestation and postoperative pain: a randomized controlled trial. *J Adv Nurs* 2015;**71**:1032-43.
19. Hasenfuss E, Franceschi A. Collaboration of nursing and child life: a palette of professional practice. *J Pediatr Nurs* 2003;**18**:359-65.
20. Doellman D. Pharmacological versus nonpharmacological techniques in reducing venipuncture psychological trauma in paediatric patients. *J Infus Nurs* 2003; **26**:103–9.
21. Bringuier S, Dadure C, Raux O, *et al.* The perioperative validity of the visual analogue anxiety scale in children: a discriminant and useful instrument in routine clinical practice to optimize post-operative pain management. *Anesth Analg* 2009;**109**:737–44.
22. Li HC, Wong ML, Lopez V. Factorial structure of the Chinese version of the State Anxiety Scale for Children (short form). *J Clin Nurs* 2008;**17**:1762-70.

- 1  
2  
3 23. Wong CL, Ip WY, Chan CWH, et al. *The stress-reducing effects of therapeutic play on*  
4 *children undergoing cast removal procedure*. Poster session presented at the Hospital  
5 Authority Convention, Hong Kong, 2017.  
6  
7  
8  
9  
10 24. Wong CL. *The best partner in a stressful medical procedure: Play*. Paper presented at the  
11 *Imagining the Future: Community Innovation and Social Resilience in Asia*, The Chinese  
12 University of Hong Kong, Hong Kong, 2017.  
13  
14  
15  
16  
17 25. Li HCW, Lopez V. Children's Emotional Manifestation Scale: development testing. *J Clin*  
18 *Nurs* 2005;**14**:223–29.  
19  
20  
21  
22 26. Brislin RW. The wording and translation of research instrument. In WJ Lonner, JW Berry  
23 eds. *Field methods in cross-cultural research*. pp. 137-164. Beverly Hills, CA.: Sage, 1986.  
24  
25  
26 27. Polit DF, Beck CT. *Essentials of nursing research: Appraising evidence for nursing practice*.  
27 8th edn. Philadelphia: Lippincott Williams & Wilkins, 2013.  
28  
29  
30  
31 28. Panda N, Bajaj A, Pershad D, et al. Pre-operative anxiety: effect of early or late position on  
32 the operating list. *Anaesthesia* 1996;**51**:344–46.  
33  
34  
35 29. Chan CWH, Choi KC, Chien WT, et al. Health-related quality-of-life and psychological  
36 distress of young adult survivors of childhood cancer in Hong Kong. *Psychooncology*  
37 2014;**23**:229-36.  
38  
39  
40  
41  
42 30. Ziegler DB, Prior MM. Preparation for surgery and adjustment to hospitalization. *Nurs Clin*  
43 *North Am* 1994;**29**:655-69.  
44  
45  
46  
47 31. Schlechter JA, Avik AL, DeMello S. Is there a role for a child life specialist during  
48 orthopedic cast room procedures? A prospective-randomized assessment. *J Pediatr Orthop*  
49 *B* 2017;**26**:575-79.  
50  
51  
52  
53  
54  
55  
56  
57  
58  
59  
60

- 1  
2  
3 32. Li HC, Lopez V, Lee TL. Effects of pre-operative therapeutic play on outcomes of school-  
4 age children undergoing day surgery. *Res Nurs Health* 2007;**30**:320-32.  
5  
6  
7  
8 33. Schreiber KM, Cunningham SJ, Kunkov S, et al. The association of preprocedural anxiety  
9 and the success of procedural sedation in children. *Am J Emerg Med* 2006;**8**:117-28.  
10  
11  
12  
13  
14  
15  
16  
17  
18  
19  
20  
21  
22  
23  
24  
25  
26  
27  
28  
29  
30  
31  
32  
33  
34  
35  
36  
37  
38  
39  
40  
41  
42  
43  
44  
45  
46  
47  
48  
49  
50  
51  
52  
53  
54  
55  
56  
57  
58  
59  
60

For peer review only

1  
2  
3 **Figure Legends**  
4

5 Figure 1: The CONSORT diagram of this study  
6  
7  
8  
9  
10  
11  
12  
13  
14  
15  
16  
17  
18  
19  
20  
21  
22  
23  
24  
25  
26  
27  
28  
29  
30  
31  
32  
33  
34  
35  
36  
37  
38  
39  
40  
41  
42  
43  
44  
45  
46  
47  
48  
49  
50  
51  
52  
53  
54  
55  
56  
57  
58  
59  
60

For peer review only

Footnotes

**Contributors:** Wan Yim and King Wah conceived and designed the study. Cho Lee and Wing Han obtained ethical approval. Ming Chau supervised data collection. Cho Lee supervised the data analysis and wrote the paper. Kai Chow provided statistical support and analysed the data. Ming Chau and Wing Han helped revising the manuscript. All authors have given final approval of the version to be published.

**Funding:** This study was supported by the Playright Children's Play Association.

**Disclaimer:** The funding agencies are not responsible for the opinions presented in the manuscript. The funding bodies had no influence on the conduct of the study or the interpretation of the results.

**Competing interests:** No conflict of interest has been declare by all the authors.

**Patient consent:** Obtained.

**Ethics approval:** This study was approved by the Joint Chinese University of Hong Kong – New Territories East Cluster Clinical Research Ethics Committee (2015.005-T).

**Provenance and peer review:** Not commissioned; externally peer reviewed.

**Data sharing statement:** Not additional data are available.

Table 1: Socio-demographics and clinical characteristics of the participants (n=208) and cast-removal technicians (n=12)

| <i>Characteristics</i>                                        | Control<br>(n=105) | Intervention<br>(n=103) | p-value #          |
|---------------------------------------------------------------|--------------------|-------------------------|--------------------|
| <b>Children and their family</b>                              |                    |                         |                    |
| <i>Age of the child (years) †</i>                             | 7.7 (3.0)          | 7.5 (2.9)               | 0.699 <sup>a</sup> |
| <i>Age group</i>                                              |                    |                         |                    |
| 3 – 7 years                                                   | 55 (52.4%)         | 52 (50.5%)              | 0.784 <sup>b</sup> |
| 8 – 12 years                                                  | 50 (47.6%)         | 51 (49.5%)              |                    |
| <i>Sex of the child</i>                                       |                    |                         |                    |
| Female                                                        | 37 (35.2%)         | 36 (35.0%)              | 0.965 <sup>b</sup> |
| Male                                                          | 68 (64.8%)         | 67 (65.0%)              |                    |
| <i>Accompanied by</i>                                         |                    |                         |                    |
| Mother only                                                   | 52 (49.5%)         | 54 (52.4%)              | 0.797 <sup>b</sup> |
| Father only                                                   | 29 (27.6%)         | 26 (25.2%)              |                    |
| Both parents                                                  | 14 (13.3%)         | 10 (9.7%)               |                    |
| Mother/father together with other relatives                   | 6 (5.7%)           | 6 (5.8%)                |                    |
| Other relatives                                               | 4 (3.8%)           | 7 (6.8%)                |                    |
| <i>Highest education attainment of the accompanied family</i> |                    |                         |                    |
| Primary or below                                              | 8 (7.6%)           | 7 (6.8%)                | 0.944 <sup>b</sup> |
| Secondary                                                     | 63 (60.0%)         | 64 (62.1%)              |                    |
| College or above                                              | 34 (32.4%)         | 32 (31.1%)              |                    |
| <i>Number of hospital admission</i>                           |                    |                         |                    |
| 0                                                             | 38 (36.2%)         | 31 (30.1%)              | 0.063 <sup>b</sup> |
| 1                                                             | 30 (28.6%)         | 36 (35.0%)              |                    |
| 2                                                             | 25 (23.8%)         | 14 (13.6%)              |                    |
| ≥ 3                                                           | 12 (11.4%)         | 22 (21.4%)              |                    |
| <i>Type of casts</i>                                          |                    |                         |                    |
| Arm long                                                      | 88 (83.8%)         | 82 (79.6%)              | 0.684 <sup>c</sup> |
| Arm short                                                     | 6 (5.7%)           | 7 (6.8%)                |                    |
| Leg long                                                      | 9 (8.6%)           | 13 (12.6%)              |                    |
| Leg short                                                     | 2 (1.9%)           | 1 (1.0%)                |                    |
| <b>CR technician (n=12)</b>                                   |                    |                         |                    |
| <i>Sex</i>                                                    |                    |                         |                    |
| Female                                                        | 32 (30.5%)         | 30 (29.1%)              | 0.831 <sup>b</sup> |
| Male                                                          | 73 (69.5%)         | 73 (70.9%)              |                    |
| <i>Age (years)</i>                                            |                    |                         |                    |
| < 30                                                          | 16 (15.2%)         | 9 (8.7%)                | 0.319 <sup>b</sup> |
| 30 – 40                                                       | 34 (32.4%)         | 39 (37.9%)              |                    |
| > 40                                                          | 55 (52.4%)         | 55 (53.4%)              |                    |
| <i>Years of experience</i>                                    |                    |                         |                    |
| < 2                                                           | 14 (13.3%)         | 9 (8.7%)                | 0.315 <sup>b</sup> |
| 2 – 5                                                         | 47 (44.8%)         | 41 (39.8%)              |                    |
| > 5                                                           | 44 (41.9%)         | 53 (51.5%)              |                    |

Data of variables marked with † are presented as mean (standard deviation), otherwise as frequency (%).

<sup>a</sup> Independent t-test;

<sup>b</sup> Pearson chi-square test;

<sup>c</sup> Fisher's exact test.

Table 2: Outcome measures across time between the intervention and control groups

|                                                                          | Control               | Intervention          | p-value             | Effect size # |
|--------------------------------------------------------------------------|-----------------------|-----------------------|---------------------|---------------|
| <b><u>Among those children aged between 3 and 7 years (N=107)</u></b>    | <b><u>(n=55)</u></b>  | <b><u>(n=52)</u></b>  |                     |               |
| <b><i>VAS anxiety scale (range: 0 – 100)</i></b>                         |                       |                       |                     |               |
| T1 (before CR procedure)                                                 | 34.0 (30.0)           | 35.4 (32.7)           |                     |               |
| T3 (after CR procedure)                                                  | 46.3 (37.3)           | 27.6 (28.6)           | 0.010 <sup>a</sup>  | 0.50          |
| <b><u>Among those children aged between 8 and 12 years (N=101)</u></b>   | <b><u>(n=50)</u></b>  | <b><u>(n=51)</u></b>  |                     |               |
| <b><i>State Anxiety Scale for Children (CSAS-C) (range: 10 – 30)</i></b> |                       |                       |                     |               |
| T1 (before CR procedure)                                                 | 17.4 (4.0)            | 18.0 (3.5)            |                     |               |
| T3 (after CR procedure)                                                  | 15.9 (4.7)            | 15.3 (3.9)            | 0.171 <sup>a</sup>  | 0.27          |
| <b><u>Among all children (N=208)</u></b>                                 |                       |                       |                     |               |
| <b><i>Children's emotional manifestation scale (range: 5 – 25)</i></b>   | <b><u>(n=105)</u></b> | <b><u>(n=103)</u></b> |                     |               |
| T2 (during CR procedure) <sup>†</sup>                                    | 9.8 (3.9)             | 7.6 (2.4)             | <0.001 <sup>b</sup> | 0.69          |
| <b><i>Heart rate (per minute)</i></b>                                    |                       |                       |                     |               |
| T1 (before CR procedure)                                                 | 87.6 (14.2)           | 86.7 (13.6)           |                     |               |
| T2 (during CR procedure)                                                 | 96.0 (16.2)           | 89.3 (15.5)           | 0.008 <sup>a</sup>  | 0.36          |
| T3 (after CR procedure)                                                  | 93.7 (14.9)           | 88.8 (15.6)           | 0.070 <sup>a</sup>  | 0.25          |
| <b><i>Parent satisfaction score (range: 10 – 50)</i></b>                 |                       |                       |                     |               |
| T3 (after CR procedure)                                                  | 42.6 (6.9)            | 46.6 (5.1)            | <0.001 <sup>b</sup> | 0.65          |
| <b><i>CR technician satisfaction score (range: 8 – 40)</i></b>           |                       |                       |                     |               |
| T3 (after CR procedure)                                                  | 31.7 (4.3)            | 34.3 (3.6)            | <0.001 <sup>b</sup> | 0.66          |
| <b><i>Duration of procedure (mins)</i></b>                               | 4.6 (2.2)             | 4.1 (2.3)             | 0.072 <sup>b</sup>  | 0.25          |

Data of variables marked with <sup>†</sup> are presented as median (inter-quartile range), otherwise as mean (standard deviation)

<sup>†</sup> Nature log-transformed before subjected to independent t-test

# Cohen's d effect size

<sup>a</sup> P-value testing for differential change of heart rate at the underlying time point with respect to T1 by using GEE model;

<sup>b</sup> Independent t-test

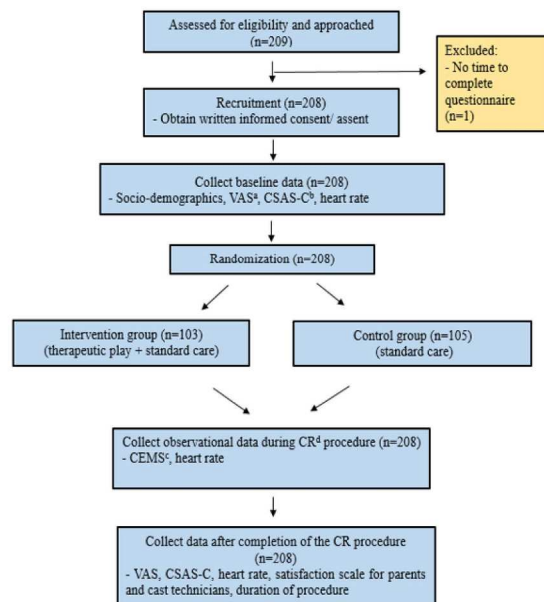

Note:

<sup>a</sup> VAS: Visual Analogue Scale

<sup>b</sup> CSAS-C: The short form Chinese version of the State Anxiety Scale for Children

<sup>c</sup> CEMS: Children's Emotional Manifestation Scale

<sup>d</sup> CR: Cast-removal

The CONSORT diagram of this study

210x297mm (300 x 300 DPI)



1  
2  
3 **Title of proposal:** The stress-reducing effects of therapeutic play on children undergoing cast-  
4 removal procedure.  
5  
6  
7

### 8 **Background**

9 It is common for children to display stressed behaviour in clinical settings, even during painless  
10 medical procedures such as cast-removal. Many behavioural and physiological manifestations of  
11 anxiety in children are associated with their compliance with the medical procedures and thus the  
12 recovery outcomes (Felder-Puig et al., 2003) and the quality of care (Tyson, Bohl, & Blickman,  
13 2014). Researchers (Li, Lopez, & Lee, 2007) has pointed out that lack of self-control and limited  
14 cognitive capabilities are two main factors associated with children's anxiety and that  
15 psychosocial preparation of the children through therapeutic play could help them gain a sense of  
16 self-control and achieve lower anxiety levels.  
17  
18  
19  
20  
21  
22

23 Therapeutic play is a set of structured activities that are designed according to the subject's age,  
24 cognitive development and health-related issues, to promote emotional and physical well-being  
25 in hospitalized children (Vessey & Mahon, 1990). Extensive studies have supported therapeutic  
26 play as an effective pre-operative preparation for both children and parents in reducing fear and  
27 anxiety (Christian, Russ, & Short, 2011; Nyugen, & Thaller, 2008). Care providers should  
28 consider the human rights of children, and provide age-appropriate information to aid  
29 understanding of the disease and the interventions employed.  
30  
31  
32  
33  
34

35 Brewer et al. (2006) evaluated the effectiveness of therapeutic play in a double-blind intervention  
36 study. The findings showed that preparation with role rehearsal and medical play could lower  
37 anxiety levels in children following elective day surgery. Additionally, a recent randomized,  
38 controlled trial (RCT) (Tyson et al., 2014) found that therapeutic play could enhance satisfaction,  
39 not only to children but also in the parents and healthcare providers. However, the efficacy of  
40 therapeutic play are yet to be determined because the reported studies were based mainly on  
41 clinical observations and most of the play manuals, which should have set out specific  
42 procedures and improved fidelity, were not fully described (Brewer et al., 2006; Stevenson et al.,  
43 2005; Tyson et al., 2014). Researchers have emphasized the need for further objective data-  
44 gathering studies on the scope of procedures in an out-patient setting.  
45  
46  
47  
48  
49  
50

51 In summary, the comprehensive value of therapeutic play—in terms of impact on the child,  
52 family and medical institution as a whole—remains largely unexplored in the literature. Our  
53 literature search revealed no reports of prospective and randomized controlled studies of the  
54  
55  
56  
57  
58  
59  
60

1  
2  
3 effectiveness of therapeutic play among Chinese children undergoing cast-removal procedures,  
4 let alone among Hong Kong Chinese.  
5  
6  
7  
8

### 9 **Aims**

10 The aim of this study is to examine the impact of the therapeutic play on the psychological stress  
11 of paediatric patients during cast-removal (CR) procedures in an orthopaedic out-patient clinic in  
12 Hong Kong. The satisfaction ratings of parents and healthcare providers in respect of these  
13 services will also be examined.  
14  
15  
16

### 17 **Methods**

#### 18 **Design**

19 This is a two-arm randomized controlled trial. Eligible children undergoing the CR procedure  
20 will be randomly allocated to either the experimental or control groups in a 1:1 ratio. The child  
21 and accompanying parent in the experimental group will receive therapeutic play intervention,  
22 and the control group will receive routine care only. All participants will be assessed on three  
23 occasions: before, during, and after completion of the CR procedure. Please refer to Figure 1 for  
24 the study protocol.  
25  
26  
27  
28  
29  
30  
31  
32  
33  
34  
35  
36  
37  
38  
39  
40  
41  
42  
43  
44  
45  
46  
47  
48  
49  
50  
51  
52  
53  
54  
55  
56  
57  
58  
59  
60

1  
2  
3  
4  
5  
6  
7  
8  
9  
10  
11  
12  
13  
14  
15  
16  
17  
18  
19  
20  
21  
22  
23  
24  
25  
26  
27  
28  
29  
30  
31  
32  
33  
34  
35  
36  
37  
38  
39  
40  
41  
42  
43  
44  
45  
46  
47  
48  
49  
50  
51  
52  
53  
54  
55  
56  
57  
58  
59  
60

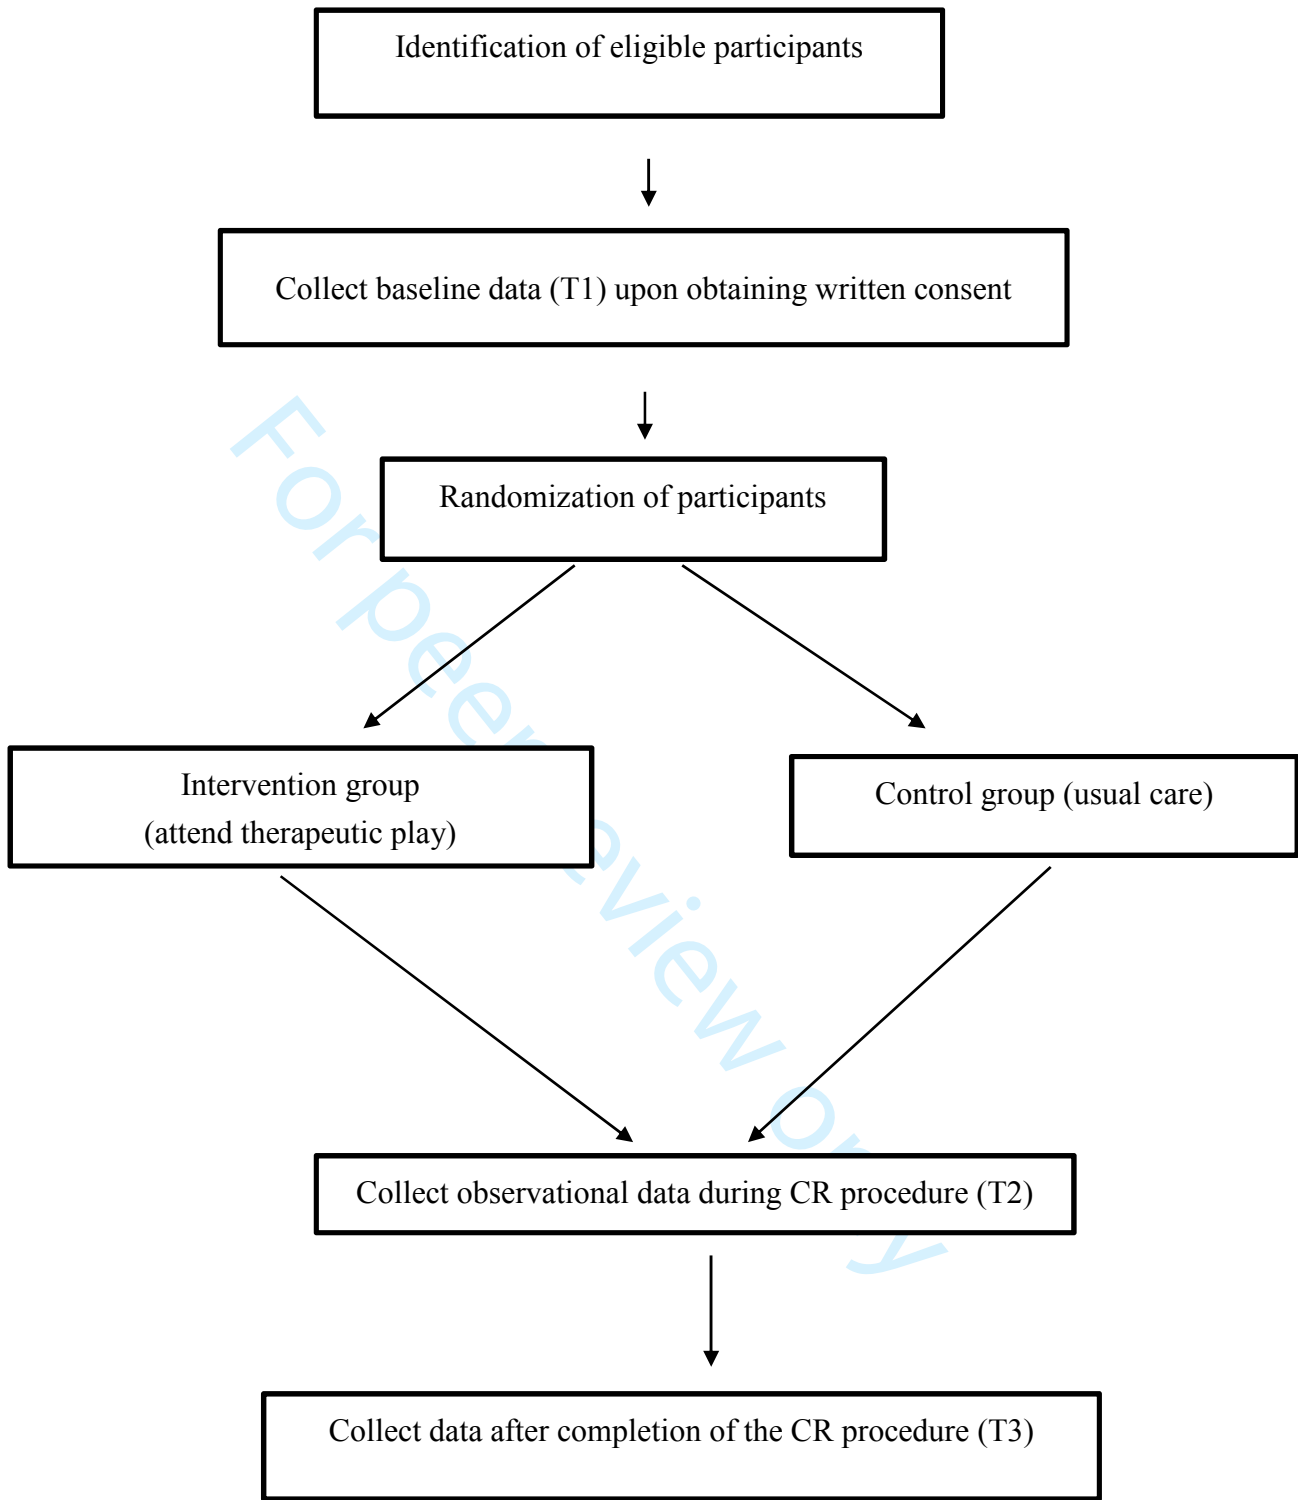

CR = cast removal

Figure 1. Study Protocol

## Research Hypotheses

The research objectives are to examine whether, in CR procedures, there are significant differences between the Intervention and Control groups in:

1. children's anxiety levels
2. children's emotional distress levels
3. children's heart rates
4. length of procedure
5. satisfaction levels of parents and technicians in respect of the procedures.

## Settings

This study will be conducted in the orthopaedic out-patient department (OPD) of a regional teaching hospital in Hong Kong. A cast room in the OPD performs approximately 20 cast-removal procedures monthly. At the time of this proposal, the standard of regimen in this OPD does not include therapeutic play services. The cast technicians attend to paediatric patients every Wednesday afternoon. They receive limited training on the developmental needs of children in their profession.

## Sample

Children and their accompanying parents, who are waiting for the cast room procedure, will be invited to participate in the study if (i) the children are 3–12 years of age and (ii) the parents are able to speak Cantonese and read Chinese. Children will be excluded if they have had a cast removed within 3 months and demonstrate obvious neurological or developmental problems during cognitive assessment by a play specialist.

The rationale for selecting 3–12-year-old is that the number of children having cast room procedure within this age range in Hong Kong is higher than for other age groups. In fact, according to Piaget's (1963) theory of cognitive development, children from 3 to 7 years of age belong to the same pre-operational stage, while those in the age range 8–12 years belong to the concrete operational stage. In addition, according to Erickson (1963), children in the same age group fall in the same stage of psychosocial development. Accordingly, randomization of participants to the experimental (E) or control (C) groups will be stratified by the two age groups: 3–7 and 8–12 years. Serially numbered opaque sealed envelopes containing the grouping identifier (E or C) for each age group will be prepared in advance by an independent statistician using computer generated random codes. The group allocation of the recruited children will be

1  
2  
3 assigned according to their ages and sequence of enrolment in the study and the grouping  
4 identifier contained in the corresponding numbered envelopes.  
5  
6  
7

8 The sample size of the study is determined to detect at least a medium effect size of Cohen's  $d =$   
9 0.5 between the experimental and control groups. According to Cohen (1992), 64 subjects in  
10 each group will be sufficient to detect a medium effect of 0.5 with 80% power at 5% level of  
11 significance. Taking into account of up to a 15% attrition rate and stratified the study by age,  
12 seventy-five children each will be recruited for the experimental and control groups per stratum  
13 by age (3–7 and 8–12 years).  
14  
15  
16  
17

### 18 **Interventions**

19 The research team discuss the study protocol and an experienced hospital play specialist (HPS)  
20 will conduct all interventions in the study during her regular shift. Each child who is assigned to  
21 the Intervention group will receive an initial assessment, who will individualize the therapeutic  
22 activities based on children's psycho-cognitive development (Erikson, 1963; Piaget, 1963) and  
23 general condition. Duration and type of intervention will be varied, based on the assessment of  
24 the child's needs, but will usually be completed within 30 minutes. The content of the  
25 therapeutic play has two main components: preparation play and distraction play (Blaine, 1999).  
26  
27  
28  
29  
30  
31

#### 32 **Preparation Play**

33 Preparation play consisting of two parts of intervention will be conducted before the CR  
34 procedure:  
35  
36  
37

#### 38 ***Part I: information given***

39 The children and parents should be well prepared by information supplied about the procedure  
40 and the choices of behaviour management. The hospital jargon were translated into ordinary  
41 language and in giving explanations in terms that suit the developmental level of the child  
42 (Brown et al., 1997). The preparation phase will be implemented individually, with their parents,  
43 in a service room. Information about the procedure will be provided, such as: (i) Why must the  
44 procedure be done? (ii) Where will the procedure take place? (iii) What will be happening? and  
45 (iv) How will it feel? Multiple coping strategies will also be introduced, so as to allow the parent  
46 and child to choose the one appropriate to them (Stephens, Barkey, & Hall, 1999); for example:  
47 (i) whether or not to watch the procedure, (ii) to pick something nice to think about and (iii) to  
48 sing a song. Choices of age-appropriate toys with specified playing activities will also be given  
49 to promote the coping strategies of the children.  
50  
51  
52  
53  
54  
55  
56  
57  
58  
59  
60

## ***Part II: rehearsal of the procedure***

After verbal explanation, a demonstration of the cast-removal procedure will be conducted, using a doll. Examples of such a demonstration are:

- Show a dummy circular-saw cast cutter with appropriate sound effect
- Play with a doll and explain how the cast is cut open by the circular saw
- Reassure the child that the saw will not cut his or her skin if he or she follows the instruction not to move
- Explain that, when the cast is cut, the child may feel vibrations or tingling, feel warmth, and see chalky dust flying
- Describe the use of spreaders and scissors to finish removing the cast
- Explain how, after the cast is open, the child's skin may appear scaly and dirty and the child's arm or leg may be a little stiff when he or she first tries to move it; also that the arm or leg may seem light because the cast was heavy.

Each child will be asked to role-play how he or she would respond to the procedure after the demonstration. During the session, parents and children will be encouraged to raise their concerns or ask any questions about the procedure. The preparation intervention will usually take 10–15mins to complete.

### **Distraction Play**

Support will be given to the children and parents throughout the cast-removal procedure by giving distraction play intervention. The aim is to focus children's attention away from the medical procedure. Methods of distraction include visual distraction, auditory distraction, deep breathing exercises, tactile stimulation, counting/singing or verbal interaction. The choice of the distraction method the children's choices (Doellman, 2003). Parental presence and involvement will be supported, and praise will be given to any successful self-control exhibited by the child. The conclusion of the procedure will be indicated by offering the child a reward (sweets or stickers).

### **Measures**

#### **A visual analogue scale (Appendix I)**

A visual analogue scale (VAS) will be used to assess the anxiety levels of children aged 3–7. The VAS is a 10 cm horizontal line anchored by the words "not worried" (low score) at one end and "very worried" (high score) at the other, with different facial expressions drawn along the line. Children aged between 5 and 7 will be asked to indicate their levels of anxiety by moving a

1  
2  
3 pointer over the line. Accompanying parent(s) will rate the anxiety levels of children aged 3–4,  
4 with higher scores indicating greater anxiety. The VAS is a widely used scale which is found to  
5 be a reliable and valid tool for measuring subjective feelings of children aged 5 to 7 (Bringuier *et*  
6 *al.*, 2009).  
7  
8  
9

### 10 **The short form of the Chinese version of the State Anxiety Scale for Children (CSAS-C)** 11 **(Appendix II)**

12 The CSAS-C was a 10-item self-report scale to measure the levels of anxiety among children  
13 aged 8-12 in busy clinical settings (Li & Lopez, 2007). The content validity of the scale has been  
14 empirically tested and the Cronbach's alpha value was 0.83. This is a 3-point Likert scale with  
15 total scores ranging from 10 to 30. Higher scores indicate greater anxiety levels (Li & Lopez,  
16 2007).  
17  
18  
19  
20  
21  
22

### 23 **Children's Emotional Manifestation Scale (CEMS) (Appendix III)**

24 The emotional behaviours of children during CR procedures will be documented using the  
25 CEMS. The CEMS was developed by Li and Lopez in 2005. It comprises five observable  
26 emotional behaviours, categorized as 'Facial expression', 'Vocalization', 'Activity', 'Interaction'  
27 and 'Level of Co-operation'. The CEMS score is obtained by reviewing the descriptions of  
28 behaviour in each category and selecting the number that most closely represents the observed  
29 behaviour at the time the subject experiences the most distress. Each category is scored from one  
30 to five. Observable behaviours in each category of the CEMS are explained in detail with an  
31 operational definition, so that the observer, a research nurse (RN) in this study, using this scale  
32 has relatively clear-cut criteria for assessment. The sum of the numbers obtained for each  
33 category is the total score, which will be between 5 and 25. Higher scores indicate the  
34 manifestation of more negative (distressed) emotional behaviours. The evaluation of the  
35 psychometric properties of the CEMS demonstrated adequate inter-rater reliability, high internal  
36 consistency, good content validity and excellent convergent validity (Li & Lopez, 2005).  
37  
38  
39  
40  
41  
42  
43  
44

### 45 **Satisfaction Scale**

46 Two questionnaires in English, developed by Tyson and colleagues (2014), will be adopted to  
47 measure parents' (Appendix IV) and cast technicians' (Appendix V) satisfaction levels. The RN  
48 will work with the research team to translate the English questionnaire into a Chinese version,  
49 with reference to a back-translation method recommended by Brislin (1970).  
50  
51  
52  
53

54 The original questionnaire for the parent is a 10-item scale to measure parents' satisfaction with  
55 the child life services. Each item will be rated by a 5-point scale ranging from 1 = strongly  
56  
57  
58  
59  
60

1  
2  
3 disagree to 5 = strongly agree. A higher score indicates a higher level of the satisfaction.  
4 Examples of the statements used are 'My child's emotional needs were met' and 'I am satisfied  
5 with the care provided to my child' (Appendix IV). The perception of the cast technician on the  
6 service will be examined by eight items, with each being rated on a scale from 1 = strongly  
7 disagree to 5 = strongly agree. Examples of the statements used are 'The child was co-operative'  
8 and 'The child engaged in distraction' (Appendix V).  
9  
10  
11  
12  
13

### 14 **Heart rate monitoring**

15 A standard automatic heart rate monitoring machine, available in the study hospital, will be used  
16 to measure children's heart rates to assess their physiological responses to CR procedures.  
17 Children's heart rates have been considered to be objective and definitive indicators for indirect  
18 assessment of anxiety level in children in previous studies (Augustin & Hains 1996; Panda *et al.*  
19 1996; Li & Lopez 2007).  
20  
21  
22  
23

### 24 **A demographic sheet**

25 A questionnaire developed by the research team will be used to measure the socio-demographic  
26 and clinical variables of the parent and their child. The items for children include age, sex,  
27 reason for cast application and number of hospital admissions. The accompany parent's age, sex,  
28 educational level and working status will also be obtained.  
29  
30  
31  
32

33 The cast technician's demographic information including age, sex and years of working  
34 experience will also be collected by the RN.  
35  
36  
37

### 38 **Data Collection Procedure**

39 Children having their casts removed will be identified outside the cast room of the study OPD by  
40 the RN. If the child meets the inclusion criteria for recruitment, permission for the child to  
41 participate will be obtained from the accompanying parent. The RN will then conduct the  
42 interview with consenting parent-child pairs in a private room. The children of the consenting  
43 parents in both groups are asked to indicate how anxious they are by filling in either the VAS  
44 anxiety scale (for children between 5-7 years old) or the short form of the CSAS-C (for children  
45 aged between 8-12) ( Li & Lopez, 2007). The RN will acquire demographic and clinical data  
46 from the parents. She will also ask the parents of children aged under 5 to use the VAS scale to  
47 indicate their child's perceived anxiety level. Children's heart rates will also be monitored for 1  
48 minute, using a standard automatic heart rate monitoring machine at the end of the interview.  
49  
50  
51  
52

53 According to the subject allocation scheme, children in the Control group will receive routine  
54 care in the CR room A, whereas those in the Intervention group will additionally receive  
55  
56  
57  
58  
59  
60



therapeutic play intervention conducted by the HPS in the CR room B. The parents and children will be asked not to discuss the purpose of the study with cast technician in the cast room during the informed consent process.

In the CR room, the RN will take the 1-minute recording of the child's heart rate when the cast technician starts sawing the cast of the child. The RN will also rate the child's signs of distress from the time the saw touches the cast until the limb is free from the cast, by means of the CEMS (Li & Lopez 2005). The length of the whole CR procedure for each child will also be recorded by the RN. The timing, duration, and nature of play for each child will be documented in a log book. After the completion of the CR procedure, The RN will take the child's heart rate for 1 min and then ask the parents and the cast technician to fill in their respective satisfaction scales to reflect their perceptions of the delivery of the CR procedure.

The RN will give a \$30 dollar coupon to the parent upon completion of data collection.

A pilot study on 5 pairs of eligible parent-child dyad will be performed to assess the feasibility of the data collection plan and to pre-test the questionnaires. The respondents' comments on and impressions of the pilot study will help the research team to refine or revise the study plan (Polit *et al.*, 2013). Please refer to the outline of data collection in Table 1.

**Table 1. The plan of data collection by the research nurse**

|                                                                                                                                                                | Pre-test data upon consent given (T1) | Observational data during procedure (T2) | Post-test data after procedure (T3) |
|----------------------------------------------------------------------------------------------------------------------------------------------------------------|---------------------------------------|------------------------------------------|-------------------------------------|
| Demographic and clinical variables                                                                                                                             | X                                     |                                          |                                     |
| VAS anxiety scale for children 3–7 years old;<br>The short form of the Chinese version of the State Anxiety Scale for Children (CSAS-C) for children aged 8–12 | X                                     |                                          | X                                   |
| Children's Emotional Manifestation Scale                                                                                                                       |                                       | X                                        |                                     |
| 1 minute heart rate recorded by an automatic heart rate monitoring machine.                                                                                    | X                                     | X                                        | X                                   |
| Parent satisfaction scale                                                                                                                                      |                                       |                                          | X                                   |

|                          |  |   |   |
|--------------------------|--|---|---|
| Staff satisfaction scale |  |   | X |
| Length of procedure      |  | X |   |

### Data Analysis

All data will be analysed using IBM SPSS for Windows, Version 22. Descriptive statistics such as mean, standard deviation, median, inter-quartile range, frequency and percentage, as appropriate, will be used to present the participants' socio-demographics and outcome measurements. Pearson's chi-squared test and student's *t*-test will be used as appropriate for comparing the baseline differences between the two groups. Generalized estimating equations (GEE) model will be used to compare the outcome measures across time between the two groups. GEE model can account for intra-correlated repeated measures data and accommodated missing data, provided the data are missing at random. All statistical analyses are two-sided and level of significance will be set at 0.05.

### Ethical Issues

Ethical approval will be sought from the Ethical Committees of the University and the study hospital prior to conducting the study. The purpose and details of the study will be clearly provided to the accompanying parents before the RN obtains their written consent. Maintenance of confidentiality and anonymity of data gained will also be assured. Participants will be informed that the quality of care will not be affected by their participation status. Please refer to the details of the information sheet and consent form in Appendix VII.

### Timeline

#### Timetable of the 20-month project

| Month                                    | 1 | 2 | 3 | 4–16 |   |   |   | 17 | 18 | 19 | 20 |
|------------------------------------------|---|---|---|------|---|---|---|----|----|----|----|
| RN training & literature review          | ★ | ★ |   |      |   |   |   |    |    |    |    |
| Questionnaires development & pilot study |   | ★ | ★ |      |   |   |   |    |    |    |    |
| Data collection                          |   |   |   | ★    | ★ | ★ | ★ | ★  | ★  |    |    |
| Data entry & data analyses               |   |   |   |      |   |   |   | ★  | ★  | ★  |    |
| Report writing                           |   |   |   |      |   |   |   |    |    | ★  | ★  |

1  
2  
3 Note: Based on recruiting 20 cases per month  
4  
5

### 6 **Significance**

7  
8 Removal of casts is a frightening procedure for children (Johnson et al., 1975), and studies on  
9 psychosocial care for children receiving the procedure are limited. This is the first study of this  
10 kind among Hong Kong Chinese children in an orthopaedic out-patient clinic. The findings will  
11 inform policy makers on the development and inclusion of therapeutic play interventions in  
12 paediatric out-patient healthcare settings.  
13  
14  
15  
16  
17  
18  
19  
20  
21  
22  
23  
24  
25  
26  
27  
28  
29  
30  
31  
32  
33  
34  
35  
36  
37  
38  
39  
40  
41  
42  
43  
44  
45  
46  
47  
48  
49  
50  
51  
52  
53  
54  
55  
56  
57  
58  
59  
60

## References

- Augustin, P. & Hains, A. A. (1996). Effect of music on ambulatory surgery patients' pre-operative anxiety. *AORN Journal* 63, (750),753–58.
- Blaine, S. (1999). The where, why, and how: Coping kits and distraction techniques. *Child Life Focus*, 1, 1–6.
- Brewer, S., Gleditsch, S. L., Syblik, D., Tietjens, M, E., & Vacik, H. W. (2006). Pediatric anxiety: child life intervention in day surgery. *Journal of Pediatric Nursing*, 21(1), 13–22.
- Bringuier, S., Dadure, C., Raux, O., Dubois, A., Picot, M. C., & Capdevila, X. (2009). The perioperative validity of the visual analogue anxiety scale in children: a discriminant and useful instrument in routine clinical practice to optimize post-operative pain management. *Anesthesia & Analgesia*, 109(3), 737–744.
- Brislin, R. W. (1986). The wording and translation of research instrument. In W. J. Lonner & J. W. Berry (Eds.). *Field methods in cross-cultural research*. (pp. 137-164). Beverly Hills, CA.: Sage.
- Brown C., Wilson, J. (1997). *Guidelines for the Development of Child Life Programs* (2<sup>nd</sup> ed). Rockville, MD, USA: Child Life Council, Inc.
- Christian, K. M., Russ, S., & Short, E. J. (2011). Pretend play processes and anxiety: Considerations for the play therapist. *International Journal of Play Therapy*, 20(4), 179–192.
- Doellman, D. (2003). Pharmacological versus nonpharmacological techniques in reducing venipuncture psychological trauma in paediatric patients. *Journal of Infusion Nursing*, 26(2), 103–109.
- Erikson, E. (1963). *Childhood and society* (2nd ed.). New York: Norton & Company.
- Felder-Puig R., Maksys A., Noestlinger C., Gadner, H., Stark, H., Pflugler, A., & Topf. R. (2003). Using a children's book to prepare children and parents for elective ENT surgery: Results of a randomized clinical trial. *International Journal of Pediatric Otorhinolaryngology*, 67, 35–41.
- Johnson, P. A. & Stockdate, D. F (1975). Effects of puppet therapy on palmar sweating of hospitalized children. *Johns Hopkins Medical Journal*, 137, 1–5.

- 1  
2  
3 Li, H. C. W., & Lopez, V. (2005). Children's Emotional Manifestation Scale: development  
4 testing. *Journal of Clinical Nursing*, *14*(2), 223–229.  
5  
6 Li, H. C. W., & Lopez, V. (2007). Development and validation of a short form of the Chinese  
7 version of the State Anxiety Scale for Children. *International Journal of Nursing Studies*,  
8 *44*(4), 566–573.  
9  
10 Li, H. C., Lopez, V., & Lee, T. L. (2007). Effects of pre-operative therapeutic play on outcomes  
11 of school-age children undergoing day surgery. *Research in Nursing & Health*, *30*(3), 320-  
12 332.  
13  
14 Panda, N., Bajaj, A., Pershad, D. Yaddanapudi, L. N. & Chari, P. (1996). Pre-operative anxiety:  
15 effect of early or late position on the operating list. *Anaesthesia*, *51*(4), 344–346.  
16  
17 Piaget, J. (1963). *The origins of intelligence in children*. New York: Norton.  
18  
19 Polit, D. F. & Beck, C. T. (2013). *Essentials of nursing research: Appraising evidence for*  
20 *nursing practice*. (8th ed.). Philadelphia: Lippincott Williams & Wilkins.  
21  
22 Stephens, B., Barkey, M., & Hall, H. (1999). Techniques to comfort children during stressful  
23 procedures. *Advances in Mind-Body Medicine*, *15*, 49–60.  
24  
25 Stevenson, M. D., Bivins, C. M., O'Brien, K., & Gonzalez del Rey, J. A. (2005). Child life  
26 intervention during angiocatheter insertion in the paediatric emergency department.  
27 *Pediatric Emergency Care*, *21*(11), 712–718.  
28  
29 Nyugen, T. J., & Thaller, S. (2008). Psychological rehabilitation of paediatric burn  
30 patients. *Journal of Craniofacial Surgery*, *19*(4), 882–87.  
31  
32 Tyson, M. E., Bohl, D. D., & Blickman, J. G. (2014). *A randomized controlled trial: Child life*  
33 *services in paediatric imaging*. Springer-Verlag.  
34  
35 Vessey, J. A., & Mahon, M. M. (1990). Therapeutic play and the hospitalised child. *Journal of*  
36 *Pediatric Nursing*, *5*(5), 328–333.  
37  
38  
39  
40  
41  
42  
43  
44  
45  
46  
47  
48  
49  
50  
51  
52  
53  
54  
55  
56  
57  
58  
59  
60

Appendix I

A 10-point level Visual Analogue Scale (VAS)

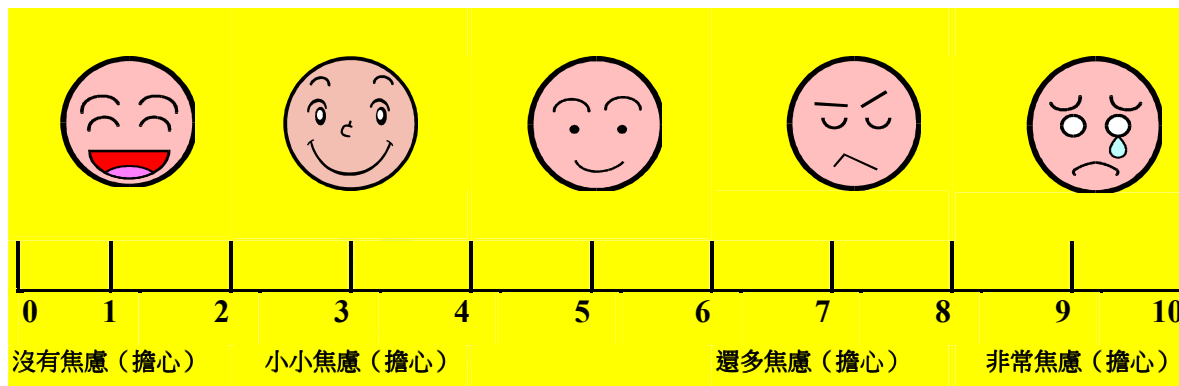

## Appendix II

### Short-Form of the Chinese version of the State Anxiety Scale

以下是一些男孩子和女孩子用來形容自己的句子。請小心閱讀每一句，然後在每句子的右方圈出最能表達你現時感覺的字句。答案是沒有分對或錯的。不要花太多時間在任何句子上，只要將最能表達你現時感覺的字句圈出來就可以了。

- |              |      |    |     |
|--------------|------|----|-----|
| 1. 我感到.....  | 十分愉快 | 愉快 | 不愉快 |
| 2. 我感到.....  | 十分不安 | 不安 | 無不安 |
| 3. 我感到.....  | 十分緊張 | 緊張 | 不緊張 |
| 4. 我感到.....  | 十分平靜 | 平靜 | 不平靜 |
| 5. 我感到.....  | 十分輕鬆 | 輕鬆 | 不輕鬆 |
| 6. 我感到.....  | 十分擔心 | 擔心 | 不擔心 |
| 7. 我感到.....  | 十分害怕 | 害怕 | 不害怕 |
| 8. 我感到.....  | 十分快樂 | 快樂 | 不快樂 |
| 9. 我感到.....  | 十分煩惱 | 煩惱 | 不煩惱 |
| 10. 我感到..... | 十分開心 | 開心 | 不開心 |

----- 此問卷到此完 -----

### Appendix 3

#### The Children Emotional Manifestation Scale

|                              | 1                                                                                 | 2                                                                                 | 3                                                                                 | 4                                                                                   | 5                                                                                   | Scored |
|------------------------------|-----------------------------------------------------------------------------------|-----------------------------------------------------------------------------------|-----------------------------------------------------------------------------------|-------------------------------------------------------------------------------------|-------------------------------------------------------------------------------------|--------|
| <b>Facial Expression</b>     |  |  |  |  |  |        |
| <b>Vocalization</b>          | No Crying                                                                         | Watery eyes                                                                       | Whimpering                                                                        | Crying                                                                              | Hard Crying or Non-stop Screaming                                                   |        |
| <b>Activity</b>              | Calm                                                                              | Annoying                                                                          | Irritable                                                                         | Restlessness                                                                        | Agitation                                                                           |        |
| <b>Interaction</b>           | Verbal interaction                                                                | Non-verbal response only                                                          | Avoid interaction                                                                 | Mild verbal protest                                                                 | Strong verbal protest                                                               |        |
| <b>Level of Co-operation</b> | Active participation                                                              | Passive participation                                                             | Withdrawal                                                                        | Extreme resistance                                                                  | Disruptive behaviour                                                                |        |

Only



## Appendix IV

## Parent Satisfaction Scale (Chinese version)

## 家長滿意程度調查

香港中文大學現在正進行一項關於拆除石膏程序的研究，希望了解病人家屬和職員對這項服務的滿意程度。以下是關於剛才拆除石膏過程的相關問題，請為每條問題圈出符合你的同意程度的號碼。答案純屬個人意見，沒有標準答案。

(1 = 非常不同意；5 = 非常同意)

|    |                      | 非常不同意 | 不同意 | 中立 | 同意 | 非常同意 |
|----|----------------------|-------|-----|----|----|------|
| 1  | 整個程序用了我的孩子能明白的語言去講解。 | 1     | 2   | 3  | 4  | 5    |
| 2  | 我孩子的情緒有被照顧到。         | 1     | 2   | 3  | 4  | 5    |
| 3  | 職員有關顧到我的孩子是否感到舒適。    | 1     | 2   | 3  | 4  | 5    |
| 4  | 我知道要怎樣去幫助我的孩子。       | 1     | 2   | 3  | 4  | 5    |
| 5  | 職員有關顧到我的疑問和憂慮。       | 1     | 2   | 3  | 4  | 5    |
| 6  | 職員尊重我對我孩子的理解。        | 1     | 2   | 3  | 4  | 5    |
| 7  | 我對我孩子所受到的照顧感到滿意。     | 1     | 2   | 3  | 4  | 5    |
| 8  | 我會推薦這個服務給其他人。        | 1     | 2   | 3  | 4  | 5    |
| 9  | 職員都是友善和樂於幫忙的。        | 1     | 2   | 3  | 4  | 5    |
| 10 | 職員們好好地共同合作去照顧我       | 1     | 2   | 3  | 4  | 5    |

|  |      |  |  |  |  |  |
|--|------|--|--|--|--|--|
|  | 的孩子。 |  |  |  |  |  |
|--|------|--|--|--|--|--|

### Parent Satisfaction Scale

These are the questions in regards to the process of pop removal, please rate each question on scale 1-5

|    |                                                                        | <b>STRONGLY<br/>DISAGREE</b> | <b>DIS-<br/>AGREE</b> | <b>NEITHER<br/>AGREE<br/>NOR<br/>DISAGREE</b> | <b>AGREE</b> | <b>STRONGLY<br/>AGREE</b> |
|----|------------------------------------------------------------------------|------------------------------|-----------------------|-----------------------------------------------|--------------|---------------------------|
| 1  | Appropriate wordings was used to let my kid to understand the process. | 1                            | 2                     | 3                                             | 4            | 5                         |
| 2  | My kid's emotion was looked well after by the team.                    | 1                            | 2                     | 3                                             | 4            | 5                         |
| 3  | Staff concerned about the comfortability of my kid.                    | 1                            | 2                     | 3                                             | 4            | 5                         |
| 4  | I knew how to assist with my kid.                                      | 1                            | 2                     | 3                                             | 4            | 5                         |
| 5  | Staff concerned about my questions and worries.                        | 1                            | 2                     | 3                                             | 4            | 5                         |
| 6  | Staff respect my knowledge to my kid.                                  | 1                            | 2                     | 3                                             | 4            | 5                         |
| 7  | I satisfied with the care received from the team.                      | 1                            | 2                     | 3                                             | 4            | 5                         |
| 8  | I would recommend this hospital to others.                             | 1                            | 2                     | 3                                             | 4            | 5                         |
| 9  | Staff were friendly and willing to help.                               | 1                            | 2                     | 3                                             | 4            | 5                         |
| 10 | Staff cooperated well to care my kid.                                  | 1                            | 2                     | 3                                             | 4            | 5                         |

**Appendix IV**  
**Staff Satisfaction Scale (Chinese version)**  
**職員滿意程度調查**

香港中文大學現在正進行一項關於拆除石膏程序的研究，希望了解病人家屬和職員對這項服務的滿意程度。以下是關於剛才拆除石膏過程的相關問題，請為每條問題圈出符合你的同意程度的號碼。答案純屬個人意見，沒有標準答案。

(1 = 非常不同意；5 = 非常同意)

|   |                       | 非常不同意 | 不同意 | 中立 | 同意 | 非常同意 |
|---|-----------------------|-------|-----|----|----|------|
| 1 | 孩子明白到甚麼事情將會發生。        | 1     | 2   | 3  | 4  | 5    |
| 2 | 孩子表現得合作。              | 1     | 2   | 3  | 4  | 5    |
| 3 | 孩子的情緒有被照顧到。           | 1     | 2   | 3  | 4  | 5    |
| 4 | 孩子的注意力已被分散。           | 1     | 2   | 3  | 4  | 5    |
| 5 | 家長明白怎樣去幫助他們的孩子。       | 1     | 2   | 3  | 4  | 5    |
| 6 | 進行拆除石膏程序的环境符合孩子的需要。   | 1     | 2   | 3  | 4  | 5    |
| 7 | 我對我們團隊所供給這個孩子的照顧感到滿意。 | 1     | 2   | 3  | 4  | 5    |
| 8 | 家人對於孩子所受到的照顧感到滿意。     | 1     | 2   | 3  | 4  | 5    |

### Staff Satisfaction Scale

These are the questions in regards to the process of pop removal, please rate each question on scale 1-5

|   |                                                               | <b>STRONGLY<br/>DISAGREE</b> | <b>DISAGREE</b> | <b>NEITHER<br/>AGREE<br/>NOR<br/>DISAGREE</b> | <b>AGREE</b> | <b>STRONGLY<br/>AGREE</b> |
|---|---------------------------------------------------------------|------------------------------|-----------------|-----------------------------------------------|--------------|---------------------------|
| 1 | The kid understood what would happen next.                    | 1                            | 2               | 3                                             | 4            | 5                         |
| 2 | The kin was cooperative.                                      | 1                            | 2               | 3                                             | 4            | 5                         |
| 3 | The kid's emotion was looked well after by the team.          | 1                            | 2               | 3                                             | 4            | 5                         |
| 4 | The kid was distracted.                                       | 1                            | 2               | 3                                             | 4            | 5                         |
| 5 | Parents knew how to help with their kids                      | 1                            | 2               | 3                                             | 4            | 5                         |
| 6 | The venue for POP removal was appropriate to kids' needs      | 1                            | 2               | 3                                             | 4            | 5                         |
| 7 | I am satisfied with the cared provided to the kid.            | 1                            | 2               | 3                                             | 4            | 5                         |
| 8 | Kid's family was satisfied with the care received by the kid. | 1                            | 2               | 3                                             | 4            | 5                         |

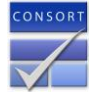

## CONSORT 2010 checklist of information to include when reporting a randomised trial\*

| Section/Topic                    | Item No | Checklist item                                                                                                                                                                              | Reported on page No |
|----------------------------------|---------|---------------------------------------------------------------------------------------------------------------------------------------------------------------------------------------------|---------------------|
| <b>Title and abstract</b>        |         |                                                                                                                                                                                             |                     |
|                                  | 1a      | Identification as a randomised trial in the title                                                                                                                                           | 1                   |
|                                  | 1b      | Structured summary of trial design, methods, results, and conclusions (for specific guidance see CONSORT for abstracts)                                                                     | 4                   |
| <b>Introduction</b>              |         |                                                                                                                                                                                             |                     |
| Background and objectives        | 2a      | Scientific background and explanation of rationale                                                                                                                                          | 6                   |
|                                  | 2b      | Specific objectives or hypotheses                                                                                                                                                           | 7                   |
| <b>Methods</b>                   |         |                                                                                                                                                                                             |                     |
| Trial design                     | 3a      | Description of trial design (such as parallel, factorial) including allocation ratio                                                                                                        | 8                   |
|                                  | 3b      | Important changes to methods after trial commencement (such as eligibility criteria), with reasons                                                                                          | N/A                 |
| Participants                     | 4a      | Eligibility criteria for participants                                                                                                                                                       | 8                   |
|                                  | 4b      | Settings and locations where the data were collected                                                                                                                                        | 8                   |
| Interventions                    | 5       | The interventions for each group with sufficient details to allow replication, including how and when they were actually administered                                                       | 10                  |
| Outcomes                         | 6a      | Completely defined pre-specified primary and secondary outcome measures, including how and when they were assessed                                                                          | 11-13               |
|                                  | 6b      | Any changes to trial outcomes after the trial commenced, with reasons                                                                                                                       | N/A                 |
| Sample size                      | 7a      | How sample size was determined                                                                                                                                                              | 9                   |
|                                  | 7b      | When applicable, explanation of any interim analyses and stopping guidelines                                                                                                                | N/A                 |
| <b>Randomisation:</b>            |         |                                                                                                                                                                                             |                     |
| Sequence generation              | 8a      | Method used to generate the random allocation sequence                                                                                                                                      | 9                   |
|                                  | 8b      | Type of randomisation; details of any restriction (such as blocking and block size)                                                                                                         | 9                   |
| Allocation concealment mechanism | 9       | Mechanism used to implement the random allocation sequence (such as sequentially numbered containers), describing any steps taken to conceal the sequence until interventions were assigned | 9                   |
| Implementation                   | 10      | Who generated the random allocation sequence, who enrolled participants, and who assigned participants to interventions                                                                     | 9                   |
| Blinding                         | 11a     | If done, who was blinded after assignment to interventions (for example, participants, care providers, those                                                                                | 21                  |

|                                                      |     |                                                                                                                                                   |         |
|------------------------------------------------------|-----|---------------------------------------------------------------------------------------------------------------------------------------------------|---------|
|                                                      |     | assessing outcomes) and how                                                                                                                       |         |
|                                                      | 11b | If relevant, description of the similarity of interventions                                                                                       | 7       |
| Statistical methods                                  | 12a | Statistical methods used to compare groups for primary and secondary outcomes                                                                     | 15      |
|                                                      | 12b | Methods for additional analyses, such as subgroup analyses and adjusted analyses                                                                  | NA      |
| <b>Results</b>                                       |     |                                                                                                                                                   |         |
| Participant flow (a diagram is strongly recommended) | 13a | For each group, the numbers of participants who were randomly assigned, received intended treatment, and were analysed for the primary outcome    | 16      |
|                                                      | 13b | For each group, losses and exclusions after randomisation, together with reasons                                                                  | 16      |
| Recruitment                                          | 14a | Dates defining the periods of recruitment and follow-up                                                                                           | 16      |
|                                                      | 14b | Why the trial ended or was stopped                                                                                                                | NA      |
| Baseline data                                        | 15  | A table showing baseline demographic and clinical characteristics for each group                                                                  | Table 1 |
| Numbers analysed                                     | 16  | For each group, number of participants (denominator) included in each analysis and whether the analysis was by original assigned groups           | 16      |
| Outcomes and estimation                              | 17a | For each primary and secondary outcome, results for each group, and the estimated effect size and its precision (such as 95% confidence interval) | 16      |
|                                                      | 17b | For binary outcomes, presentation of both absolute and relative effect sizes is recommended                                                       | NA      |
| Ancillary analyses                                   | 18  | Results of any other analyses performed, including subgroup analyses and adjusted analyses, distinguishing pre-specified from exploratory         | NA      |
| Harms                                                | 19  | All important harms or unintended effects in each group (for specific guidance see CONSORT for harms)                                             | NA      |
| <b>Discussion</b>                                    |     |                                                                                                                                                   |         |
| Limitations                                          | 20  | Trial limitations, addressing sources of potential bias, imprecision, and, if relevant, multiplicity of analyses                                  | 20      |
| Generalisability                                     | 21  | Generalisability (external validity, applicability) of the trial findings                                                                         | 20      |
| Interpretation                                       | 22  | Interpretation consistent with results, balancing benefits and harms, and considering other relevant evidence                                     | 19      |
| <b>Other information</b>                             |     |                                                                                                                                                   |         |
| Registration                                         | 23  | Registration number and name of trial registry                                                                                                    | 5       |
| Protocol                                             | 24  | Where the full trial protocol can be accessed, if available                                                                                       | 22      |
| Funding                                              | 25  | Sources of funding and other support (such as supply of drugs), role of funders                                                                   |         |

\*We strongly recommend reading this statement in conjunction with the CONSORT 2010 Explanation and Elaboration for important clarifications on all the items. If relevant, we also recommend reading CONSORT extensions for cluster randomised trials, non-inferiority and equivalence trials, non-pharmacological treatments, herbal interventions, and pragmatic trials. Additional extensions are forthcoming: for those and for up to date references relevant to this checklist, see [www.consort-statement.org](http://www.consort-statement.org).

# BMJ Open

## Effects of therapeutic play on children undergoing cast-removal procedures: a randomised controlled trial

|                                 |                                                                                                                                                                                                                                                                                                                                                                                                                                                                                                                                                                                                                                                     |
|---------------------------------|-----------------------------------------------------------------------------------------------------------------------------------------------------------------------------------------------------------------------------------------------------------------------------------------------------------------------------------------------------------------------------------------------------------------------------------------------------------------------------------------------------------------------------------------------------------------------------------------------------------------------------------------------------|
| Journal:                        | <i>BMJ Open</i>                                                                                                                                                                                                                                                                                                                                                                                                                                                                                                                                                                                                                                     |
| Manuscript ID                   | bmjopen-2017-021071.R1                                                                                                                                                                                                                                                                                                                                                                                                                                                                                                                                                                                                                              |
| Article Type:                   | Research                                                                                                                                                                                                                                                                                                                                                                                                                                                                                                                                                                                                                                            |
| Date Submitted by the Author:   | 22-Mar-2018                                                                                                                                                                                                                                                                                                                                                                                                                                                                                                                                                                                                                                         |
| Complete List of Authors:       | Wong, Cho Lee; The Chinese University of Hong Kong, Faculty of Medicine, The Nethersole School of Nursing<br>Ip, Wan Yim; The Chinese University of Hong Kong, Faculty of Medicine, The Nethersole School of Nursing<br>Kwok, Blondi Ming Chau; Playright Children's Play Association<br>Choi, Kai Chow; The Chinese University of Hong Kong, Faculty of Medicine, The Nethersole School of Nursing<br>Ng, Bobby King Wah; The Chinese University of Hong Kong, Faculty of Medicine, Department of Orthopaedics & Traumatology<br>Chan, Carmen Wing Han; The Chinese University of Hong Kong, Faculty of Medicine, The Nethersole School of Nursing |
| <b>Primary Subject Heading</b>: | Paediatrics                                                                                                                                                                                                                                                                                                                                                                                                                                                                                                                                                                                                                                         |
| Secondary Subject Heading:      | Health services research                                                                                                                                                                                                                                                                                                                                                                                                                                                                                                                                                                                                                            |
| Keywords:                       | HEALTH SERVICES ADMINISTRATION & MANAGEMENT, ORTHOPAEDIC & TRAUMA SURGERY, Paediatric orthopaedics < ORTHOPAEDIC & TRAUMA SURGERY                                                                                                                                                                                                                                                                                                                                                                                                                                                                                                                   |
|                                 |                                                                                                                                                                                                                                                                                                                                                                                                                                                                                                                                                                                                                                                     |

SCHOLARONE™  
Manuscripts

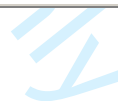

1  
2  
3 **Title: Effects of therapeutic play on children undergoing cast-removal**  
4  
5 **procedures: a randomised controlled trial**  
6  
7

8 **Authors:**

9 Wong CL, Ip WY, Kwok BMC, Choi KC, Ng BKW, Chan CWH.  
10  
11

12  
13 **Authors' information:**

14 Correspondence to CL Wong:

15 Cho Lee Wong

16 PhD, RN

17 Assistant Professor

18  
19 The Nethersole School of Nursing, Faculty of Medicine, The Chinese University of  
20 Hong Kong, Hong Kong, China

21 Room 824, Esther Lee Building, The Chinese University of Hong Kong, Hong Kong.

22 Telephone number: (852) 3943 8166

23 Fax number: (852) 2603 5269

24 Email: [jojowong@cuhk.edu.hk](mailto:jojowong@cuhk.edu.hk)  
25  
26

27  
28  
29  
30  
31  
32 Wan Yim Ip

33 PhD, RN

34 Associate Professor (Retired)

35  
36 The Nethersole School of Nursing, Faculty of Medicine, The Chinese University of  
37 Hong Kong, Hong Kong, China

38 Email: [wanyimip@cuhk.edu.hk](mailto:wanyimip@cuhk.edu.hk)  
39  
40

41  
42  
43 Kwok Blondi Ming Chau

44 BN, RN

45 Manager (Community & Hospital)

46 Playright Children's Play Association, Hong Kong, China

47 Email: [blondi@playright.org.hk](mailto:blondi@playright.org.hk)  
48  
49

50  
51  
52  
53 Kai Chow Choi

54 PhD  
55  
56  
57  
58  
59  
60



1  
2  
3 Senior Research Fellow

4 The Nethersole School of Nursing, Faculty of Medicine, The Chinese University of

5 Hong Kong, Hong Kong, China

6 Email: [kchoi@cuhk.edu.hk](mailto:kchoi@cuhk.edu.hk)

7  
8  
9  
10 Bobby King Wah Ng

11 M.D.

12 Clinical Professional Consultant of Orthopaedics & Traumatology

13 Department of Orthopaedics & Traumatology, Faculty of Medicine, The Chinese

14 University of Hong Kong, Hong Kong, China

15 Email: [bobng@ort.cuhk.edu.hk](mailto:bobng@ort.cuhk.edu.hk)

16  
17  
18  
19  
20  
21  
22 Carmen Wing Han Chan

23 PhD, RN

24 Vice-Director of Education / Professor

25 The Nethersole School of Nursing, Faculty of Medicine, The Chinese University of

26 Hong Kong, Hong Kong, China

27 Email: [whchan@cuhk.edu.hk](mailto:whchan@cuhk.edu.hk)

28  
29  
30  
31  
32  
33 **Keywords**

34 cast-removal, randomized controlled trial, therapeutic play

35  
36  
37  
38 **Word count**

39 4,700

## Abstract

**Objectives:** To examine (i) the effectiveness of therapeutic play in reducing anxiety and negative emotional manifestations among children undergoing cast-removal procedures; (ii) the satisfaction of parents and cast technicians with cast-removal procedures.

**Design:** A randomised controlled trial.

**Setting:** An orthopaedic outpatient department of a regional teaching hospital in Hong Kong.

**Participants:** Children (n=208) aged 3-12 undergoing cast removal procedure were invited to participate.

**Interventions:** Eligible children were randomly allocated to either the intervention (n=103) or control group (n=105) and stratified by the two age groups (3–7 and 8–12 years). The intervention group received therapeutic play intervention, whereas the control group received standard care only. Participants were assessed on three occasions: before, during, and after completion of the cast removal procedure.

**Outcome measures:** Children's anxiety level, emotional manifestation, and heart rate. The satisfaction ratings of parents and cast technicians with respect to therapeutic play intervention were also examined.

**Results:** Findings suggested that therapeutic play assists children aged 3-7 to reduce anxiety levels with mean differences between the intervention and control group was -20.1 (95% CI: -35.3 to -4.9; p=0.01). Overall, children (aged 3-7 and 8-12) in the intervention groups exhibited fewer negative emotional manifestations than the control group with a mean score difference -2.2 (95% CI: -3.1 to -1.4; p<0.001). Parents and technicians in the intervention group also reported a higher level of satisfaction with the procedures than the control group with a mean score difference

1  
2  
3 of 4.0 (95% CI: -5.6 to 2.3;  $p < 0.001$ ) and 2.6 (95% CI: 3.7 to 1.6;  $p < 0.001$ ),  
4  
5 respectively.

6  
7 **Conclusion:** Therapeutic play effectively reduces anxiety and negative emotional  
8  
9 manifestations among children undergoing cast-removal procedures. The findings  
10  
11 highlight the importance of integrating therapeutic play into standard care, in  
12  
13 particular for children in younger age.  
14

15  
16 **Trial Registration:** The Chinese Clinical Trials Registry: ChiCTR-IOR-15006822.  
17  
18

19  
20 **Strengths and limitations of this study:**  
21

- 22 • This study was one of the first randomised controlled trial to examine the effects of  
23  
24 therapeutic play on children undergo cast-removal procedures, building the evidence  
25  
26 base of therapeutic play.  
27
- 28 • A major limitation was the lack of blinding of outcome assessor. Another limitation  
29  
30 was recruiting children from a single clinical setting so that the generalisability of the  
31  
32 findings may be restricted.  
33
- 34 • The strength of this study included employing both subjective and objective outcome  
35  
36 measures to evaluate the impact of therapeutic play on the psychological state of a  
37  
38 child.  
39  
40  
41  
42  
43  
44  
45  
46  
47  
48  
49  
50  
51  
52  
53  
54  
55  
56  
57  
58  
59  
60

## Introduction

It is common for children to display stressed behaviour in clinical settings even during painless medical procedures such as cast removal.<sup>1 2</sup> The original injuries sustained by the children, added to the unfamiliar environment and the equipment used during the procedures, are likely to provoke anxiety and fear in children of any age. The psychological burden on children not only makes the procedures difficult to perform effectively and efficiently, but may also impose medical risks.<sup>1 3</sup> For instance, an extreme case of death in a child having history of cardiomyopathy during the cast room procedure has been reported.<sup>1</sup> Moreover, anxiety in the children also reduces parents' satisfaction with the care provided.<sup>4</sup> Various strategies such as the use of ear protection or musical lullabies have been used but have not proved very effective.<sup>5 6</sup> Other interventions to reduce anxiety levels in children coping with cast-removal (CR) procedures should be explored.

Therapeutic play is a set of structured activities designed according to the subject's age, cognitive development and health-related issues, to promote emotional and physical well-being in hospitalised children.<sup>7</sup> The therapeutic play activities may include scrapbooking, storytelling, doll demonstration, and art activities. Li and colleagues suggested that hospitalised children who engaged in therapeutic play exhibited fewer negative emotions and experienced lower levels of anxiety than those who did not.<sup>8</sup> A recent systematic review of 14 articles found that therapeutic play was commonly employed for children undergoing invasive procedures, such as elective surgery, vaccination, blood collection or dental treatment in in-patient settings, with positive changes in the behaviour of those who participated in play sessions and a reduction in their anxieties.<sup>9</sup> However, some of these studies were limited by the lack

1  
2  
3 of random assignment of subjects into intervention or control groups. Besides, the  
4 efficacy of therapeutic play interventions is yet to be determined, as the studies  
5 reported were mainly based on clinical observation and most of the play manuals,  
6 which should have set out specific procedures to improve fidelity, were not fully  
7 described.<sup>10-12</sup> Future study that adopt a robust randomized controlled design and  
8 delineate the scope of play procedures is clearly necessary.  
9  
10  
11  
12  
13  
14

15  
16 Our literature search revealed no reports of prospective and randomised controlled  
17 studies on therapeutic play among children undergoing CR procedures, let alone  
18 among Hong Kong Chinese. Most importantly, the comprehensive value of  
19 therapeutic play in paediatric orthopaedic cast rooms - in their impact on the children,  
20 parents and medical institution as a whole - remains largely unexplored in the  
21 literature. This study aimed to examine the effectiveness of therapeutic play in  
22 reducing anxiety and negative emotional manifestations among children undergoing  
23 cast-removal procedures. The satisfaction ratings of parents and cast technicians in  
24 respect of the cast-removal procedures were also to be examined.  
25  
26  
27  
28  
29  
30  
31  
32  
33  
34  
35  
36

### 37 **Theoretical Framework**

38  
39 Lazarus and Folkman's theory of stress and coping theory was used to guide this  
40 trial.<sup>13</sup> They suggest that stress is a relationship between a person and the environment  
41 that the person finds taxing or exceeding resources. Coping is a constantly changing  
42 cognitive and behavioural effort to manage stressful situations. The two types of  
43 strategy used to cope with stress are problem-focused and emotional-focused coping.  
44 When individuals perceive that they cannot change the threatening situation, they will  
45 resort to emotion-focused coping.<sup>13</sup> It is well known that cast-removal procedures is  
46 stressful for children.<sup>1,2</sup> Children likely feel stress and anxiety if they perceived a lack  
47  
48  
49  
50  
51  
52  
53  
54  
55  
56  
57  
58  
59  
60

1  
2  
3 of control over the medical procedure.<sup>8</sup> Therapeutic play works by helping children to  
4  
5 prepare for the procedure and thereby assist them to regain a sense of self-control to  
6  
7 cope with the stressful procedure.<sup>13, 14</sup> As a result, it is reasoned that children  
8  
9 undergoing therapeutic play intervention will be more likely to cope with cast  
10  
11 removal procedures and feel less stress and anxiety.  
12  
13  
14

## 15 16 **Methods**

### 17 18 **Design**

19  
20 A two-arm parallel randomised controlled trial was employed.  
21  
22  
23

### 24 25 **Setting**

26  
27 The study was conducted in the orthopaedic outpatient department (OPD) of a  
28  
29 regional teaching hospital in Hong Kong, where the OPD cast room performs  
30  
31 approximately 20 CR procedures monthly. The standard regimen in this OPD did not  
32  
33 include therapeutic play intervention.  
34  
35  
36

### 37 38 **Participants**

#### 39 40 *Children*

41  
42 Children and their accompanying parents who were waiting for the cast room  
43  
44 procedure were invited to participate in the study if: (i) the child was 3-12 years of  
45  
46 age; and (ii) the parents were able to speak Cantonese and read Chinese. Children  
47  
48 were excluded if they: (i) had had a cast removed within the previous 3 months; or (ii)  
49  
50 had neurological or developmental problems as shown on the medical record.  
51

52  
53 The rationale for selecting 3-12 year olds was that the number of children having  
54  
55 cast room procedure within this age range in Hong Kong was higher than for other  
56  
57  
58

1  
2  
3 age groups. According to Piaget's (1963) theory of cognitive development, children  
4 from 3-7 belong to the same pre-operational stage, while those between 8-12 belong  
5 to the concrete operational stage.<sup>15</sup> Children in different age group are at the different  
6 stage of psychosocial development and likely respond to cast-removal procedures and  
7 therapeutic play differently.<sup>16</sup> Therefore, children were stratified according to their  
8 age group (3-7 and 8-12).

9  
10  
11  
12  
13  
14  
15  
16 The sample size of the study was determined to detect an effect size of Cohen's  $d$   
17  $=0.6$  on the outcomes of anxiety level and emotional manifestation between the  
18 intervention and control groups with reference to previous therapeutic play studies<sup>17-18</sup>  
19 for guiding the selection of a minimum detectable effect. By using the power analysis  
20 software GPower 3.1, 45 subjects in each group were sufficient to detect an effect of  
21 at least 0.6 with 80% power at 5% level of significance. Taking into account of up to  
22 a 15% attrition rate and stratified the study by age, 53 children each would be  
23 recruited for the intervention and control groups per stratum by age (3-7 & 8-12  
24 years).

### 35 36 37 *Accompany parents and cast technicians*

38  
39  
40 All accompany parents and cast technicians involved in the cast-removal  
41 procedures were invited to assess their satisfaction for the procedures.  
42  
43  
44  
45

### 46 47 **Randomisation**

48  
49 Eligible children undergoing the CR procedure were randomly allocated to the  
50 intervention or control groups in a 1:1 ratio. Randomisation were stratified by the two  
51 age groups, 3-7 and 8-12 years. Serially numbered opaque sealed envelopes  
52 containing the grouping identifier (intervention or control) for each age group were  
53  
54  
55  
56  
57

1  
2  
3 prepared in advance by an independent statistician using computer-generated random  
4  
5 codes. The group allocation of the children recruited was assigned according to their  
6  
7 ages and sequence of enrolment in the study, and the grouping identifier contained in  
8  
9 the corresponding numbered envelopes.  
10

### 11 12 13 **Control Group: Standard Care**

14  
15 Participants in the control group received standard care without therapeutic play  
16  
17 intervention. Standard care included the nurse explaining why and what would be  
18  
19 done and saying comforting and supportive words during the procedures.  
20  
21  
22  
23

### 24 **Intervention Group: Therapeutic Play**

25  
26 In addition to the standard care, children in the intervention group also received  
27  
28 therapeutic play intervention. The interventions were conducted by an experienced  
29  
30 and well-trained senior hospital play specialist (HPS). The HPS has more than five  
31  
32 years of experience in delivering therapeutic play - including preparation play and  
33  
34 distraction play - to children undergoing medical treatments in various units of  
35  
36 hospitals. To ensure therapeutic play interventions were provided according to the  
37  
38 children's needs and psycho-cognitive development,<sup>15-16</sup> the research team met with  
39  
40 the HPS to set up the research protocol (supplementary file). The content of the  
41  
42 therapeutic play had two main components: preparation and distraction forms of  
43  
44 play.<sup>19</sup> The duration of intervention was about 30 minutes.  
45  
46  
47  
48  
49

#### 50 ***Preparation play***

51  
52 Preparation play was conducted before the CR procedure. A demonstration of the  
53  
54 CR procedure was conducted using a doll. The demonstration included:  
55  
56  
57  
58  
59  
60



- Showing a dummy circular-saw cast cutter with appropriate sound effects
- Playing with a doll and explaining how the cast was cut open by the circular saw
- Reassuring children that the saw would not cut their skin if they followed the instruction not to move
- Explaining that, when the cast was cut, the child might feel vibration or tingling, notice a certain warmth and see chalky dust flying
- Describing the use of spreaders and scissors to finish removing the cast
- Explaining how, after the cast was open, the skin might appear scaly and dirty and the limb feel a little stiff when first moved; also that the arm or leg might seem light because the cast had been heavy.

During the demonstration, the children were asked to touch and play with the doll and material, and role-play how they would respond to the procedure after the demonstration. The preparation play usually took 10–15 minutes to complete.

### ***Distraction play***

Throughout the CR procedure, support was given to children by introducing distraction play. The aim of the distraction play was to divert children's attention away from the medical procedure. Methods of distraction included visual or auditory distraction, deep breathing exercises, tactile stimulation, counting/singing or other verbal interaction. The choice of method depended on the children's choices.<sup>20</sup> The parents' presence and involvement were supported, and the children were praised for any act of successful self-control. The conclusion of the procedure was indicated by offering the children a reward (e.g. stickers). The children did not know that they would receive reward in advance.

## Primary outcome measures

### Anxiety

#### *Visual analogue scale*

A visual analogue scale (VAS) was used to assess the anxiety levels of children between 3 and 7. The VAS consists of a 10-cm horizontal line anchored by the words 'not worried' (low score) at one end and 'very worried' (high score) at the other, with drawings of different facial expressions spaced along the line. Children aged between 3-7 were asked to indicate their levels of anxiety by moving a pointer over the line. As children of 3 or 4 may have limited verbal expression abilities, their parents were also invited to rate the anxiety levels of their children. The VAS is a widely used scale which has been found to be a reliable and valid tool for measuring children's subjective feelings.<sup>21</sup>

#### *The short-form Chinese version of the State Anxiety Scale for Children (CSAS-C)*

The CSAS-C is a 10-item self-report scale measuring the anxiety levels of children aged 8-12 in busy clinical setting.<sup>17</sup> It is a three-point Likert scale with total scores ranging from 10 to 30, with higher scores indicating greater anxiety levels.<sup>17</sup> The psychometric properties of the short form have been tested and found to correlate highly with the scores on the full form ( $r = 0.92$ ), with good internal consistency ( $r = 0.83$ ) and convergent validity that differentiate the state anxiety of children in various situations. Factorial structure of the short form was also checked using exploratory and confirmatory analyses.<sup>22</sup> The Cronbach's alpha of the scale in this study was 0.80 to 0.88.<sup>23-24</sup>

#### *Children's Emotional Manifestation Scale (CEMS)*

1  
2  
3 The emotional behaviour of children during CR procedures was documented by  
4 using the CEMS, developed by Li and Lopez in 2005. It comprises five observable  
5 emotional forms of behaviour, categorised as ‘facial expression’, ‘vocalisation’,  
6  
7 ‘activity’, ‘interaction’ and ‘level of co-operation’. The CEMS score is obtained by  
8  
9 reviewing the descriptions of behaviour in each category and selecting the number  
10  
11 that most closely represents the behaviour observed at the time the subject  
12  
13 experiences the most distress. Each category is scored from one to five. Observable  
14  
15 forms of behaviour in each category of the CEMS are explained in detail with an  
16  
17 operational definition, so that the observer, a research nurse in this study, using the  
18  
19 scale has relatively clear-cut criteria for assessment. The sum of the numbers obtained  
20  
21 for each category is the total score, which will be between 5-25, higher scores  
22  
23 indicating the manifestation of more negative (distressed) emotional behaviour. The  
24  
25 evaluation of the psychometric properties of the CEMS demonstrated adequate  
26  
27 reliability and validity.<sup>25</sup> The Cronbach’s alpha of the scale in this study was 0.86.<sup>23-24</sup>  
28  
29  
30  
31  
32  
33  
34

## 35 **Secondary outcome measures**

### 36 **Satisfaction scale for parent and cast technician**

37  
38 Two questionnaires in English, developed by Tyson and colleagues (2014),<sup>12</sup> were  
39  
40 adopted to measure parents' and cast technicians' satisfaction levels. The original  
41  
42 questionnaire for parents is a 10-item scale to measure their satisfaction with the child  
43  
44 life services. Each item is rated on a five-point scale ranging from 1 = strongly  
45  
46 disagree - 5 = strongly agree, higher scores indicating higher levels of satisfaction.  
47  
48 Example of the statement used is ‘My child’s emotional needs were met’. The  
49  
50 perception of the cast technician was examined by eight items, with each being rated  
51  
52 on a scale from 1 = strongly disagree - 5 = strongly agree. Example of the statement  
53  
54  
55  
56  
57  
58  
59  
60

1  
2  
3 used is 'the child engaged in distraction'. The researcher translated the questionnaire  
4 into Chinese, using the back-translation method recommended by Brislin (1986).<sup>26</sup>  
5  
6 The translated version was reviewed by a panel of expert professionals for semantic  
7 and content equivalence. The scale level of semantic equivalence for the parents'  
8 satisfaction and cast technician satisfaction was 95% and 92%, respectively,  
9  
10 indicating that the translated version was a correct reflection of the original version.<sup>27</sup>  
11  
12 The content validity index of the parent's satisfaction level scale was 0.90 and cast  
13 technician's satisfaction level scale was 0.94, indicating the content of the translated  
14 scale were equivalent to the original version. The Cronbach's alpha of both scales in  
15 this study was 0.90.  
16  
17  
18  
19  
20  
21  
22  
23  
24  
25

### 26 **Heart rate monitoring**

27  
28 A standard automatic heart rate monitoring machine, available in the study  
29 hospital, was used to measure children's heart rates to assess their physiological  
30 responses to CR procedures. Children's heart rates have been considered objective  
31 and definitive indicators for an indirect assessment of children's anxiety levels in  
32 previous studies.<sup>28</sup>  
33  
34  
35  
36  
37  
38

39 Anxiety produced due to CR procedures likely manifested as an increase in heart rate  
40 in children.  
41  
42  
43  
44  
45

### 46 **A demographic sheet**

47  
48 The socio-demographic and clinical variables of parents and children were  
49 collected. The items for children include age, sex, reason for cast application and  
50 number of hospital admissions. The accompany parent's age, sex, educational level  
51 and working status was also obtained. The cast technician's demographic information,  
52  
53  
54  
55  
56  
57  
58  
59  
60

1  
2  
3 including age, sex and years of work experience, was also collected by the research  
4  
5 nurse.

### 9 **Data collection**

10  
11 Children having their cast-removal would be arranged to wait outside the cast  
12 room of the study OPD in a separate timeslot. They would be identified by a research  
13 nurse in the waiting area. Permission for a child meeting the recruitment criteria to  
14 participate was obtained from the accompanying parent. The research nurse  
15 conducted the interview with consenting parent-child pairs in a private room. The  
16 children in both groups were asked to indicate how anxious they were by completing  
17 either the VAS anxiety scale (for children between 3–7 years old) or the short form of  
18 the CSAS-C (for children aged between 8–12).<sup>17</sup> The research nurse obtained  
19 demographic and clinical data from the parents. She also asked the parents of children  
20 aged under 5 to use the VAS scale to indicate their child's perceived anxiety level.  
21 Children's heart rates were also monitored for one minute at the end of the interview,  
22 using a standard automatic monitor.

23  
24 According to the subject allocation scheme, children in the control group received  
25 standard care in CR room A, while the intervention group additionally received a  
26 therapeutic play intervention conducted by the HPS in CR room B. The parents and  
27 children were asked during the informed consent process not to discuss the purpose of  
28 the study with cast technicians in the cast room.

29  
30 In the CR room, the research nurse took two one-minute recordings of the child's  
31 heart rate: (1) when the cast technician started sawing the cast; and (2) immediately  
32 after the cast had been removed. The research nurse then rated the child's signs of  
33 distress from the time the saw touched the cast until the limb was free of it, by means

1  
2  
3 of the CEMS.<sup>25</sup> She also recorded the length of the whole CR procedure for each  
4 child. After the CR procedure, the research nurse asked the parents and the cast  
5 technician to fill in their respective satisfaction scales to reflect their perceptions of  
6 how the CR procedure had been delivered. The children were asked to recall their  
7 level of anxiety throughout the procedure by filling in either the VAS anxiety scale  
8 (for those between 3-7) or the short form of the CSAS-C (for those between 8-12).<sup>17</sup>  
9  
10  
11  
12  
13  
14  
15  
16 Parents were asked to rate the VAS scale for children under 5.  
17  
18  
19

### 20 **Data analysis**

21  
22 All data were analysed by means of IBM SPSS for Windows, Version 22.  
23  
24 Appropriate descriptive statistics were used to present the participants' socio-  
25 demographics and outcome measurements. A generalised estimating equations (GEE)  
26 model was used to compare each of the repeated outcome measures across time  
27 between the two groups. The model can account for intra-correlated repeated  
28 measures data and produce effect estimates even in the presence of missing data,  
29 provided they are missing at completely random. All statistical analyses were two-  
30 sided, with the level of significance set at 0.05.  
31  
32  
33  
34  
35  
36  
37  
38  
39  
40  
41

### 42 **Patient and Public involvement**

43  
44 Development of research question and outcome measures were based on the facts  
45 that many children reported anxiety during the cast removal procedures. Patients were  
46 not involved in the design, subject recruitment, and the conduction of the study. The  
47 findings will be disseminated to the study participants by publishing the study as an  
48 original article. A satisfaction survey was conducted involving the parents of the  
49  
50  
51  
52  
53  
54  
55  
56  
57  
58  
59  
60

1  
2  
3 participants to assess whether the participants experienced any burden during the  
4  
5 intervention.

## 6 7 8 9 **Results**

### 10 11 **Demographic and clinical characteristics of the children and their families**

12  
13 From August 2015 - January 2017, a total of 209 patients and their accompanying  
14  
15 parents were screened and approached. However, one of them declined to participate  
16  
17 in the study because they were in a hurry and had to leave the clinic at once after the  
18  
19 procedure. Therefore, a total of 208 participants and their accompany parents were  
20  
21 recruited. Of these, 105 were allocated to the control group and 103 to the  
22  
23 intervention group (Figure 1). Their mean ages were 7.7 (SD 3.0) and 7.5 (SD 2.9),  
24  
25 respectively. The demographic and clinical characteristics of the two groups were  
26  
27 comparable and are shown in Table 1.  
28  
29  
30  
31  
32

### 33 **Anxiety levels**

#### 34 *Children aged between 3 and 7*

35  
36 The mean anxiety scores of children aged 3-7 in the intervention group as  
37  
38 measured by VAS anxiety scale decreased from 35.4 to 27.6 after the CR procedures.  
39  
40 By contrast, the mean anxiety levels of children who did not take part in therapeutic  
41  
42 play increased from 34.0 to 46.3. The difference in mean changes between the two  
43  
44 groups as estimated by the group by time interaction term by using GEE was -20.1  
45  
46 (95% CI: -35.3 to -4.9; p=0.010) (Table 2).  
47  
48  
49

50  
51 Accompanying parent(s) with children under 5 were invited to rate the anxiety  
52  
53 levels of their children using VAS. The results showed that there were moderate to  
54  
55 high correlations between the children and their parent's rating before ( $r = 0.36$ , 95%  
56  
57  
58  
59  
60

1  
2  
3 CI: 0.0 to 0.65;  $p < 0.05$ ) and after the CR procedure ( $r = 0.50$ , 95% CI: 0.13 to 0.74;  
4  
5  $p < 0.01$ ).

### 9 ***Children aged between 8 and 12***

11 The mean anxiety scores of children in the intervention group as measured by  
12 CSAS-C fell from 18.0 to 15.3, and in the control group from 17.4 to 15.9. The  
13 difference in mean changes between the two groups as estimated by using GEE was -  
14  
15 1.1 (95% CI: -2.8 to 0.5;  $p = 0.171$ ). (Table 3).

### 22 **Emotional manifestation during cast-removal procedures**

24 The mean emotional manifestation scores of children aged 3 - 7 and 8 - 12 in the  
25 intervention group were significantly lower than the control group (Table 2 and Table  
26  
27 3). Overall, the mean emotional manifestation scores of the intervention group were  
28  
29 7.6 (SD 2.4) and of the control group 9.8 (SD 3.9) with a mean difference of -2.2  
30  
31 (95% CI: -3.1 to -1.4;  $p < 0.001$ ), indicating that children in the intervention group, on  
32  
33 average, exhibited fewer negative emotional manifestations during the CR procedures  
34  
35 comparing with those children in the control group (Table 4).

### 42 **Changes in heart rate**

44 No significant difference in heart rate was noted between the intervention and  
45 control group among children aged 3 and 7 years old (Table 2). In contrast, significant  
46  
47 difference was found before and during CR procedure between the intervention and  
48  
49 control group among children aged 8 and 12 years old (Table 3). Among all children,  
50  
51 a trend of increasing heart rate was noted before and during the CR procedures for  
52  
53 both groups. The mean heart rate of the intervention and control groups increased by  
54  
55



1  
2  
3 2.6 and 8.4 beats/minute, respectively with a difference in mean changes between the  
4  
5 two groups as estimated by using GEE was -5.9 (95% CI: -10.3 to -1.5;  $p=0.008$ ),  
6  
7 indicating that the children in the intervention group might experience lower levels of  
8  
9 anxiety than those in the control group (Table 4).  
10

### 11 12 13 **Satisfaction levels of parents and cast technicians**

14  
15 Among all children, the satisfaction scores of parents in the intervention group  
16  
17 (46.6, SD 5.1) were higher than the control group (42.6, SD 6.9) with a mean  
18  
19 difference of 4.0 (95% CI: 5.6 to 2.3;  $p<0.001$ ). Similarly, the satisfaction scores of  
20  
21 CR technician in the intervention group (34.3, SD 3.6) were higher than those in the  
22  
23 control group (31.7, SD 4.3) with a mean difference of 2.6 (95% CI: 3.7 to 1.6;  
24  
25  $p<0.001$ ). (Table 4).  
26  
27  
28  
29  
30

### 31 **Duration of procedure**

32  
33 Among all children, the mean time (in minutes) taken to perform the CR  
34  
35 procedure was shorter in the intervention 4.1 (SD 2.3) than in the control groups 4.6  
36  
37 (SD 2.2) with a mean difference of -0.56 (95% CI: -1.17 to 0.05;  $p=0.072$ ). (Table 2).  
38  
39  
40  
41

## 42 **Discussion**

43  
44 This study expanded previous studies and examined the effects of a therapeutic  
45  
46 play intervention on CR procedures in patients, parents and institutions. A randomised  
47  
48 controlled design was employed such that the cause and effect relationships among  
49  
50 variables could be established.<sup>27</sup> Findings suggest that therapeutic play effectively  
51  
52 assists children aged 3-7 to cope with stressful CR procedures and reduces their  
53  
54  
55  
56  
57  
58  
59  
60

1  
2  
3 anxiety levels. Overall, children who received the intervention exhibited significantly  
4  
5 fewer negative emotional manifestations than those who did not.  
6

7 Most children in this study presented some degree of anxiety before the  
8  
9 procedures, the use of a saw and the fluctuating level of high-frequency noise  
10  
11 probably accounting for most of the anxiety.<sup>1 29</sup> Previous studies employed ear  
12  
13 protection <sup>5</sup> or lullaby-type music <sup>6</sup> to reduce anxiety in children during CR, while  
14  
15 heart rate and mean arterial blood pressure were used as physiological outcome  
16  
17 indicators of anxiety, respectively. However, no significant difference was noted in  
18  
19 these parameters in either study.  
20  
21

22 The positive results of the present study are further supported by the fact that the  
23  
24 mean increase in heart rates before and during the procedure was lower in the  
25  
26 intervention than in the control group. A possible explanation may be that the  
27  
28 therapeutic play assisted children to cope with an unfamiliar procedure. During the  
29  
30 play session, the HPS explained and simulated the CR procedures, which allowed the  
31  
32 children to understand them. As the children were familiarised with the procedure,  
33  
34 they would expect it to generate noise but not pain. These preparations assisted the  
35  
36 children in such a way that they had an enhanced sense of control over the procedure,  
37  
38 minimising the adverse effects of the experience.<sup>6</sup> As suitable and age-appropriate  
39  
40 distraction were provided to the intervention group, the children's attention was  
41  
42 diverted from the anxiety-provoking procedure to playful interaction. They therefore  
43  
44 exhibited less negative emotional behaviour. However, children without any  
45  
46 distraction might have focused on the whole procedure and thus exhibited more  
47  
48 negative emotions and increased anxiety levels, even after it was all over.  
49  
50  
51

52 Nevertheless, although children of 8-12 in the intervention group had larger  
53  
54 reductions in their anxiety scores than those in the control group after the procedure,  
55  
56  
57  
58  
59  
60

1  
2  
3 the difference between the groups was non-significant. The results were in conflict  
4  
5 with those of a previous study suggesting that older hospitalised children benefit more  
6  
7 from the play intervention.<sup>21 30</sup> One possible explanation for the non-significant  
8  
9 findings is that older children have a better understanding of CR procedures than  
10  
11 younger children. According to Piaget (1963),<sup>15</sup> children of 8–12 can mentally  
12  
13 manipulate information to solve problems. As they may have obtained information  
14  
15 about the CR procedure from other sources, such as books, the internet or friends,  
16  
17 they might feel less anxious about the forthcoming procedure. Moreover, compared  
18  
19 with younger children, older children probably have better coping strategies and better  
20  
21 control of their emotions, even in stressful situations. Nevertheless, further study is  
22  
23 needed to determine other effective methods for children at this developmental stage.  
24  
25

26  
27 Consistent with a previous study,<sup>31</sup> the result indicated that parents of children in  
28  
29 the intervention group were more satisfied with the care and play intervention than  
30  
31 those of children receiving standard care only. The satisfaction of parents in the  
32  
33 intervention group is likely to have increased because they also experienced the  
34  
35 positive influence of play on their children, particularly the reduction in anxiety and  
36  
37 improved cooperation with the procedure.<sup>32</sup> In fact, parental perception played an  
38  
39 important role on child's coping with various conditions such as cancer or other  
40  
41 medical procedures.<sup>33</sup> The positive correlations in the VAS ratings of children under 5  
42  
43 further suggested that parents also perceived their children to be less anxious after the  
44  
45 intervention. However, further study could also include self-report questionnaire not  
46  
47 only on satisfaction but also examine the mediating role of parents play in the  
48  
49 distraction intervention.  
50  
51

52  
53 Some cast technicians might have concerns that the CR procedures would be  
54  
55 impeded and prolonged because the play intervention was implemented at the same  
56  
57

1  
2  
3 time. However, the findings suggest that the duration of the entire procedure was  
4 shorter in the intervention than in the control group, although the differences were  
5 non-significant. Nevertheless, the duration in the intervention group did decrease,  
6 probably because the children were psychologically prepared and were thus more  
7 cooperative. In fact, children who are less anxious are easier to manage in clinical  
8 situations,<sup>34</sup> which may account for the increased satisfaction of CR technicians in  
9 procedures assisted by HPS.  
10  
11  
12  
13  
14  
15  
16  
17  
18  
19

### 20 **Limitations**

21  
22 The results of the current study should be interpreted in the light of several  
23 limitations. First, children were recruited from a single clinical setting. The  
24 generalisability of the findings may therefore be restricted. Second, neither patients  
25 nor outcome assessors were blinded to the study. However, because of the very nature  
26 of the intervention, blinding of patients and outcome assessors would have been  
27 difficult. Although children are unlikely to change their behaviour even when they  
28 know they are participating in a certain intervention,<sup>9</sup> however, lack of blinding may  
29 contribute to an importance source of bias because the assessors know the group  
30 allocation of children which likely affect their ratings of children's emotional  
31 manifestation during the CR procedures. Nevertheless, different strategies were  
32 employed to minimise the potential bias. For example, children were assigned to  
33 different cast rooms and isolated from other patients at the time of the intervention,  
34 regardless of whether or not they were randomised to the play intervention group.  
35 Also, subjective and objective outcome measures were used to evaluate the impact of  
36 therapeutic play on the psychological state of a child. Finally, there might be other  
37 factors that affect children's anxiety level and play predisposition such as children'  
38  
39  
40  
41  
42  
43  
44  
45  
46  
47  
48  
49  
50  
51  
52  
53  
54  
55  
56  
57  
58  
59  
60

1  
2  
3 coping styles or temperament, or parent's anxiety level and symptomatology towards  
4  
5 cast-removal procedure. Future study should take these factors into account and  
6  
7 consider to include the assessment of children's coping style or parents' anxiety level  
8  
9 as well.  
10

### 11 12 13 **Conclusions**

14  
15 This study confirms the findings of previous work that children experience some  
16  
17 degree of anxiety and exhibit negative emotional manifestations during medical  
18  
19 procedures. The consequences of stress appear to be substantial, and thus the  
20  
21 importance of assisting children to cope effectively with it and reduce its impact is  
22  
23 highlighted. A gap in the literature is addressed by providing empirical evidence on  
24  
25 the benefits of therapeutic play for children, family and medical institution during CR  
26  
27 procedures. The findings show that a play intervention effectively reduces anxiety  
28  
29 levels and negative emotional manifestations among children undergoing CR  
30  
31 procedures. Such positive outcomes also translate into an improvement in the  
32  
33 satisfaction levels of parents and CR technicians with the procedures. Play is  
34  
35 universal and similar intervention can be adopted in other settings or medical  
36  
37 procedures. It may also adopt to reduce anxiety and improve motor abilities of  
38  
39 children that underwent invasive procedures.<sup>35</sup> The findings highlight the importance  
40  
41 of providing and integrating therapeutic play into standard care. Such an intervention  
42  
43 ensures that holistic and quality care is provided to ease the psychological burden of  
44  
45 the patients. Furthermore, it contributes to improve patient care, satisfaction and  
46  
47 overall experience of children and their families.  
48  
49  
50  
51  
52  
53  
54

### 55 **Acknowledgements**

1  
2  
3 We would like to express our sincere gratitude for the generous support of  
4 Kuenflower Management Inc. (in honour of Kwong Sik Kwan and Kwong Hui May  
5 Kuen) given to the UBS Optimus Foundation in sponsorship for this project.  
6  
7  
8  
9  
10  
11  
12

### 13 **References**

- 14  
15 1. Katz K, Fogelman R, Attias J, *et al.* Anxiety reaction in children during removal of  
16 their plaster cast with a saw. *J Bone Joint Surg* 2001;**83**:388-90.  
17  
18
- 19 2. Mahan ST, Harris MS, Lierhaus AM, *et al.* Noise reduction to reduce patient  
20 anxiety during cast removal: can we decrease patient anxiety with cast removal  
21 by wearing noise reduction headphones during cast saw use? *Orthop Nurs*  
22 2017;**36**:271-78.  
23  
24
- 25 3. Sanders MB, Starr AJ, Frawley WH, *et al.* Posttraumatic stress symptoms in  
26 children recovering from minor orthopaedic injury and treatment. *J Orthop*  
27 *Trauma* 2005;**19**:623-8.  
28  
29
- 30 4. He HG, Zhu LX, Chan WC, *et al.* A mixed-method study of effects of a therapeutic  
31 play intervention for children on parental anxiety and parents' perceptions of the  
32 intervention. *J Adv Nurs* 2015;**71**:1539-51.  
33  
34
- 35 5. Carmichael KD, Westmoreland J. Effectiveness of ear protection in reducing  
36 anxiety during cast removal in children. *Am J Orthop* 2005;**34**:43-6.  
37  
38
- 39 6. Liu RW, Mehta P, Fortuna S, *et al.* A randomized prospective study of music  
40 therapy for reducing anxiety during cast room procedures. *J Pediatr Orthop*  
41 2007;**27**:831-33.  
42  
43
- 44 7. Vessey JA, Mahon MM. Therapeutic play and the hospitalized child. *J Pediatr*  
45 *Nurs* 1990;**5**:328-33.  
46  
47  
48  
49  
50  
51  
52  
53  
54  
55  
56  
57  
58  
59  
60

- 1  
2  
3 8. Li WH, Chung JO, Ho KY, *et al.* Play interventions to reduce anxiety and negative  
4  
5 emotions in hospitalized children. *BMC Pediatr* 2016;**11**:16-36.  
6
- 7 9. Silva RD, Austregésilo SC, Ithamar L, *et al.* Therapeutic play to prepare children  
8  
9 for invasive procedures: a systematic review. *J Pediatr (Rio J)* 2017;**93**:6-16.  
10
- 11 10. Brewer S, Gleditsch SL, Syblik D, *et al.* Pediatric anxiety: child life intervention  
12  
13 in day surgery. *J Pediatr Nurs* 2006;**21**:13–22.  
14
- 15 11. Stevenson MD, Bivins CM, O'Brien K, *et al.* Child life intervention during  
16  
17 angiocatheter insertion in the pediatric emergency department. *Pediatr Emerg*  
18  
19 *Care* 2005;**21**:712–18.  
20
- 21 12. Tyson ME, Bohl DD, Blickman JG. *A randomized controlled trial: Child life*  
22  
23 *services in paediatric imaging*. Springer-Verlag, 2014.  
24
- 25 13. Lazarus RS, Folkman S. *Stress, Appraisal and Coping*. New York: Springer, 1984.  
26
- 27 14. Li HC, Chung OK, Ho KY, *et al.* Coping strategies used by children hospitalized  
28  
29 with cancer: an exploratory study. *Psychooncology* 2011;**20**:969-76.  
30
- 31 15. Piaget J. *The origins of intelligence in children*. New York: Norton, 1963.  
32
- 33 16. Erikson E. *Childhood and society*. 2nd edn. New York: Norton & Company, 1963.  
34
- 35 17. Li HCW, Lopez V. Development and validation of a short form of the Chinese  
36  
37 version of the State Anxiety Scale for Children. *Int J Nurs Stud* 2007;**44**:566–73.  
38
- 39 18. He HG, Zhu L, Chan SW, *et al.* Therapeutic play intervention on children's  
40  
41 perioperative anxiety, negative emotional manifestation and postoperative pain: a  
42  
43 randomized controlled trial. *J Adv Nurs* 2015;**71**:1032-43.  
44
- 45 19. Hasenfuss E, Franceschi A. Collaboration of nursing and child life: a palette of  
46  
47 professional practice. *J Pediatr Nurs* 2003;**18**:359-65.  
48  
49  
50  
51  
52  
53  
54  
55  
56  
57  
58  
59  
60

- 1  
2  
3 20. Doellman D. Pharmacological versus nonpharmacological techniques in reducing  
4 venipuncture psychological trauma in paediatric patients. *J Infus Nurs* 2003;  
5 26:103–9.  
6  
7  
8  
9 21. Bringuier S, Dadure C, Raux O, *et al.* The perioperative validity of the visual  
10 analogue anxiety scale in children: a discriminant and useful instrument in  
11 routine clinical practice to optimize post-operative pain management. *Anesth*  
12 *Analg* 2009;**109**:737–44.  
13  
14  
15 22. Li HC, Wong ML, Lopez V. Factorial structure of the Chinese version of the State  
16 Anxiety Scale for Children (short form). *J Clin Nurs* 2008;**17**:1762-70.  
17  
18  
19  
20  
21  
22  
23  
24 23. Wong CL, Ip WY, Chan CWH, *et al.* *The stress-reducing effects of therapeutic*  
25 *play on children undergoing cast removal procedure.* Poster session presented at  
26 the Hospital Authority Convention, Hong Kong, 2017.  
27  
28  
29  
30  
31 24. Wong CL. *The best partner in a stressful medical procedure: Play.* Paper  
32 presented at the Imagining the Future: Community Innovation and Social  
33 Resilience in Asia, The Chinese University of Hong Kong, Hong Kong, 2017.  
34  
35  
36  
37 25. Li HCW, Lopez V. Children's Emotional Manifestation Scale: development  
38 testing. *J Clin Nurs* 2005;**14**:223–29.  
39  
40  
41  
42 26. Brislin RW. The wording and translation of research instrument. In WJ Lonner,  
43 JW Berry eds. *Field methods in cross-cultural research.* pp. 137-164. Beverly  
44 Hills, CA.: Stage, 1986.  
45  
46  
47  
48 27. Polit DF, Beck CT. *Essentials of nursing research: Appraising evidence for*  
49 *nursing practice.* 8th edn. Philadelphia: Lippincott Williams & Wilkins, 2013.  
50  
51  
52 28. Panda N, Bajaj A, Pershad D, *et al.* Pre-operative anxiety: effect of early or late  
53 position on the operating list. *Anaesthesia* 1996;**51**:344–46.  
54  
55  
56  
57  
58  
59  
60



- 1  
2  
3 29. Chan CWH, Choi KC, Chien WT, *et al.* Health-related quality-of-life and  
4  
5 psychological distress of young adult survivors of childhood cancer in Hong  
6  
7 Kong. *Psychooncology* 2014;**23**:229-36.  
8  
9  
10 30. Ziegler DB, Prior MM. Preparation for surgery and adjustment to hospitalization.  
11  
12 *Nurs Clin North Am* 1994;**29**:655-69.  
13  
14 31. Schlechter JA, Avik AL, DeMello S. Is there a role for a child life specialist  
15  
16 during orthopedic cast room procedures? A prospective-randomized assessment.  
17  
18 *J Pediatr Orthop B* 2017;**26**:575-79.  
19  
20 32. Li HC, Lopez V, Lee TL. Effects of pre-operative therapeutic play on outcomes of  
21  
22 school-age children undergoing day surgery. *Res Nurs Health* 2007;**30**:320-32.  
23  
24 33. Tremolada M, Bonichini S, Basso G, *et al.* Coping with pain in children with  
25  
26 leukemia. *Int J Cancer Res Pre* 2015;**8**:451-66.  
27  
28 34. Schreiber KM, Cunningham SJ, Kunkov S, *et al.* The association of preprocedural  
29  
30 anxiety and the success of procedural sedation in children. *Am J Emerg Med*  
31  
32 2006;**8**:117-28.  
33  
34  
35 35. Taverna L, Tremolada M, Bonichini S, *et al.* Motor skill delays in pre-school  
36  
37 children with leukemia one year after treatment: Hematopoietic stem cell  
38  
39 transplantation therapy as an important risk factor. *PLoS ONE* 2017;**12**:  
40  
41 e0186787.  
42  
43  
44  
45  
46  
47  
48  
49  
50  
51  
52  
53  
54  
55  
56  
57  
58  
59  
60

## Figure Legends

Figure 1: The CONSORT diagram of this study

## Footnotes

**Contributors:** Wan Yim and King Wah conceived and designed the study. Cho Lee and Wing Han obtained ethical approval. Ming Chau supervised data collection. Cho Lee supervised the data analysis and wrote the paper. Kai Chow provided statistical support and analysed the data. Ming Chau and Wing Han helped revising the manuscript. All authors have given final approval of the version to be published.

**Funding:** This study was supported by the Playright Children's Play Association.

**Disclaimer:** The funding agencies are not responsible for the opinions presented in the manuscript. The funding bodies had no influence on the conduct of the study or the interpretation of the results.

**Competing interests:** No conflict of interest has been declare by all the authors.

**Patient consent:** Obtained.

**Ethics approval:** This study was approved by the Joint Chinese University of Hong Kong – New Territories East Cluster Clinical Research Ethics Committee (2015.005-T).

**Provenance and peer review:** Not commissioned; externally peer reviewed.

**Data sharing statement:** Not additional data are available.

Table 1: Socio-demographics and clinical characteristics of the participants (n=208) and cast-removal technicians (n=12)

| <i>Characteristics</i>                                        | Control (n=105) | Intervention (n=103) |
|---------------------------------------------------------------|-----------------|----------------------|
| <b><u>Children and their family</u></b>                       |                 |                      |
| <i>Age of the child (years) †</i>                             | 7.7 (3.0)       | 7.5 (2.9)            |
| <i>Age group</i>                                              |                 |                      |
| 3 – 7 years                                                   | 55 (52.4%)      | 52 (50.5%)           |
| 8 – 12 years                                                  | 50 (47.6%)      | 51 (49.5%)           |
| <i>Sex of the child</i>                                       |                 |                      |
| Female                                                        | 37 (35.2%)      | 36 (35.0%)           |
| Male                                                          | 68 (64.8%)      | 67 (65.0%)           |
| <i>Accompanied by</i>                                         |                 |                      |
| Mother only                                                   | 52 (49.5%)      | 54 (52.4%)           |
| Father only                                                   | 29 (27.6%)      | 26 (25.2%)           |
| Both parents                                                  | 14 (13.3%)      | 10 (9.7%)            |
| Mother/father together with other relatives                   | 6 (5.7%)        | 6 (5.8%)             |
| Other relatives                                               | 4 (3.8%)        | 7 (6.8%)             |
| <i>Highest education attainment of the accompanied family</i> |                 |                      |
| Primary or below                                              | 8 (7.6%)        | 7 (6.8%)             |
| Secondary                                                     | 63 (60.0%)      | 64 (62.1%)           |
| College or above                                              | 34 (32.4%)      | 32 (31.1%)           |
| <i>Number of hospital admission</i>                           |                 |                      |
| 0                                                             | 38 (36.2%)      | 31 (30.1%)           |
| 1                                                             | 30 (28.6%)      | 36 (35.0%)           |
| 2                                                             | 25 (23.8%)      | 14 (13.6%)           |
| ≥ 3                                                           | 12 (11.4%)      | 22 (21.4%)           |
| <i>Type of casts</i>                                          |                 |                      |
| Arm long                                                      | 88 (83.8%)      | 82 (79.6%)           |
| Arm short                                                     | 6 (5.7%)        | 7 (6.8%)             |
| Leg long                                                      | 9 (8.6%)        | 13 (12.6%)           |

|                             |            |            |
|-----------------------------|------------|------------|
| Leg short                   | 2 (1.9%)   | 1 (1.0%)   |
| <b>CR technician (n=12)</b> |            |            |
| <i>Sex</i>                  |            |            |
| Female                      | 32 (30.5%) | 30 (29.1%) |
| Male                        | 73 (69.5%) | 73 (70.9%) |
| <i>Age (years)</i>          |            |            |
| < 30                        | 16 (15.2%) | 9 (8.7%)   |
| 30 – 40                     | 34 (32.4%) | 39 (37.9%) |
| > 40                        | 55 (52.4%) | 55 (53.4%) |
| <i>Years of experience</i>  |            |            |
| < 2                         | 14 (13.3%) | 9 (8.7%)   |
| 2 – 5                       | 47 (44.8%) | 41 (39.8%) |
| > 5                         | 44 (41.9%) | 53 (51.5%) |

Data of variables marked with † are presented as mean (standard deviation), otherwise as frequency (%).

Table 2: Outcome measures across time between the intervention and control groups among those children aged between 3 and 7 years (N=107)

|                                                                 | Control<br>(n=55) | Intervention<br>(n=52) | p-value             | Effect size (95% CI) #           |
|-----------------------------------------------------------------|-------------------|------------------------|---------------------|----------------------------------|
| <b>VAS anxiety scale (range: 0 – 100)</b>                       |                   |                        |                     |                                  |
| T1 (before CR procedure)                                        | 34.0 (30.0)       | 35.4 (32.7)            |                     |                                  |
| T3 (after CR procedure)                                         | 46.3 (37.3)       | 27.6 (28.6)            | 0.010 <sup>a</sup>  | 0.50 (0.11 , 0.88) <sup>c</sup>  |
| <b>Children's emotional manifestation scale (range: 5 – 25)</b> |                   |                        |                     |                                  |
| T2 (during CR procedure) <sup>†</sup>                           | 10.6 (4.7)        | 8.1 (2.9)              | 0.002 <sup>b</sup>  | 0.62 (0.23 , 1.01)               |
| <b>Heart rate (per minute)</b>                                  |                   |                        |                     |                                  |
| T1 (before CR procedure)                                        | 88.7 (14.9)       | 88.6 (14.5)            |                     |                                  |
| T2 (during CR procedure)                                        | 95.8 (17.7)       | 89.8 (16.6)            | 0.081 <sup>a</sup>  | 0.33 (-0.05 , 0.71) <sup>c</sup> |
| T3 (after CR procedure)                                         | 97.2 (15.6)       | 90.0 (17.2)            | 0.051 <sup>a</sup>  | 0.37 (-0.01 , 0.75) <sup>c</sup> |
| <b>Parent satisfaction score (range: 10 – 50)</b>               |                   |                        |                     |                                  |
| T3 (after CR procedure)                                         | 42.5 (6.7)        | 47.3 (3.3)             | <0.001 <sup>b</sup> | 0.89 (0.49 , 1.28)               |
| <b>CR technician satisfaction score (range: 8 – 40)</b>         |                   |                        |                     |                                  |
| T3 (after CR procedure)                                         | 31.5 (5.0)        | 33.9 (3.7)             | 0.007 <sup>b</sup>  | 0.54 (0.15 , 0.92)               |
| <b>Duration of procedure (mins)</b>                             |                   |                        |                     |                                  |
|                                                                 | 4.8 (2.2)         | 4.2 (2.0)              | 0.126 <sup>b</sup>  | 0.30 (-0.08 , 0.68)              |

Data of variables marked with † are presented as median (inter-quartile range), otherwise as mean (standard deviation)

<sup>†</sup> Nature log-transformed before subjected to independent t-test

# Cohen's d effect size

<sup>a</sup> P-value testing for differential change of heart rate at the underlying time point with respect to T1 by using GEE model

<sup>b</sup> Independent t-test

<sup>c</sup>The Cohen's d effect size corresponds to the standardized mean difference of the mean changes at the underlying time point with respect to T1 between the intervention and control groups

Table 3: Outcome measures across time between the intervention and control groups among those children aged between 8 and 12 years (N=101)

|                                                                   | Control<br>(n=50) | Intervention<br>(n=51) | p-value             | Effect size (95% CI) #           |
|-------------------------------------------------------------------|-------------------|------------------------|---------------------|----------------------------------|
| <b>State Anxiety Scale for Children (CSAS-C) (range: 10 – 30)</b> |                   |                        |                     |                                  |
| T1 (before CR procedure)                                          | 17.4 (4.0)        | 18.0 (3.5)             |                     |                                  |
| T3 (after CR procedure)                                           | 15.9 (4.7)        | 15.3 (3.9)             | 0.171 <sup>a</sup>  | 0.27 (-0.12 , 0.66) <sup>c</sup> |
| <b>Children's emotional manifestation scale (range: 5 – 25)</b>   |                   |                        |                     |                                  |
| T2 (during CR procedure) †                                        | 9.0 (2.6)         | 7.0 (1.4)              | <0.001 <sup>b</sup> | 0.93 (0.51 , 1.33)               |
| <b>Heart rate (per minute)</b>                                    |                   |                        |                     |                                  |
| T1 (before CR procedure)                                          | 86.3 (13.4)       | 84.8 (12.6)            |                     |                                  |
| T2 (during CR procedure)                                          | 96.2 (14.4)       | 88.7 (14.5)            | 0.037 <sup>a</sup>  | 0.41 (0.01 , 0.80) <sup>c</sup>  |
| T3 (after CR procedure)                                           | 89.9 (13.1)       | 87.5 (13.8)            | 0.720 <sup>a</sup>  | 0.07 (-0.32 , 0.46) <sup>c</sup> |
| <b>Parent satisfaction score (range: 10 – 50)</b>                 |                   |                        |                     |                                  |
| T3 (after CR procedure)                                           | 42.8 (7.1)        | 46.0 (6.5)             | 0.020 <sup>b</sup>  | 0.47 (0.07 , 0.86)               |
| <b>CR technician satisfaction score (range: 8 – 40)</b>           |                   |                        |                     |                                  |
| T3 (after CR procedure)                                           | 31.8 (3.5)        | 34.8 (3.5)             | <0.001 <sup>b</sup> | 0.83 (0.42 , 1.24)               |
| <b>Duration of procedure (mins)</b>                               |                   |                        |                     |                                  |
|                                                                   | 4.4 (2.2)         | 3.9 (2.5)              | 0.314 <sup>b</sup>  | 0.20 (-0.19 , 0.59)              |

Data of variables marked with † are presented as median (inter-quartile range), otherwise as mean (standard deviation)

† Nature log-transformed before subjected to independent t-test

# Cohen's d effect size

<sup>a</sup> P-value testing for differential change at the underlying time point with respect to T1 by using GEE model

<sup>b</sup> Independent t-test

<sup>c</sup> The Cohen's d effect size corresponds to the standardized mean difference of the mean changes at the underlying time point with respect to T1 between the intervention and control groups

Table 4: Outcome measures across time between the intervention and control groups

|                                                                 | Control        | Intervention   | p-value             | Effect size (95% CI) #           |
|-----------------------------------------------------------------|----------------|----------------|---------------------|----------------------------------|
| <b>Among all children (N=208)</b>                               |                |                |                     |                                  |
| <b>Children's emotional manifestation scale (range: 5 – 25)</b> |                |                |                     |                                  |
|                                                                 | <b>(n=105)</b> | <b>(n=103)</b> |                     |                                  |
| T2 (during CR procedure) †                                      | 9.8 (3.9)      | 7.6 (2.4)      | <0.001 <sup>b</sup> | 0.69 (0.41 , 0.69)               |
| <b>Heart rate (per minute)</b>                                  |                |                |                     |                                  |
| T1 (before CR procedure)                                        | 87.6 (14.2)    | 86.7 (13.6)    |                     |                                  |
| T2 (during CR procedure)                                        | 96.0 (16.2)    | 89.3 (15.5)    | 0.008 <sup>a</sup>  | 0.36 (0.09 , 0.64) <sup>c</sup>  |
| T3 (after CR procedure)                                         | 93.7 (14.9)    | 88.8 (15.6)    | 0.070 <sup>a</sup>  | 0.25 (-0.02 , 0.52) <sup>c</sup> |
| <b>Parent satisfaction score (range: 10 – 50)</b>               |                |                |                     |                                  |
| T3 (after CR procedure)                                         | 42.6 (6.9)     | 46.6 (5.1)     | <0.001 <sup>b</sup> | 0.65 (0.38 , 0.93)               |
| <b>CR technician satisfaction score (range: 8 – 40)</b>         |                |                |                     |                                  |
| T3 (after CR procedure)                                         | 31.7 (4.3)     | 34.3 (3.6)     | <0.001 <sup>b</sup> | 0.66 (0.38 , 0.94)               |
| <b>Duration of procedure (mins)</b>                             | 4.6 (2.2)      | 4.1 (2.3)      | 0.072 <sup>b</sup>  | 0.25 (-0.02 , 0.52)              |

Data of variables marked with † are presented as median (inter-quartile range), otherwise as mean (standard deviation)

† Nature log-transformed before subjected to independent t-test

# Cohen's d effect size

<sup>a</sup> P-value testing for differential change at the underlying time point with respect to T1 by using GEE model

<sup>b</sup> Independent t-test

<sup>c</sup> The Cohen's d effect size corresponds to the standardized mean difference of the mean changes at the underlying time point with respect to T1 between the intervention and control groups

1  
2  
3  
4  
5  
6  
7  
8  
9  
10  
11  
12  
13  
14  
15  
16  
17  
18  
19  
20  
21  
22  
23  
24  
25  
26  
27  
28  
29  
30  
31  
32  
33  
34  
35  
36  
37  
38  
39  
40  
41  
42  
43  
44  
45  
46  
47  
48  
49  
50  
51  
52  
53  
54  
55  
56  
57  
58  
59  
60

For peer review only

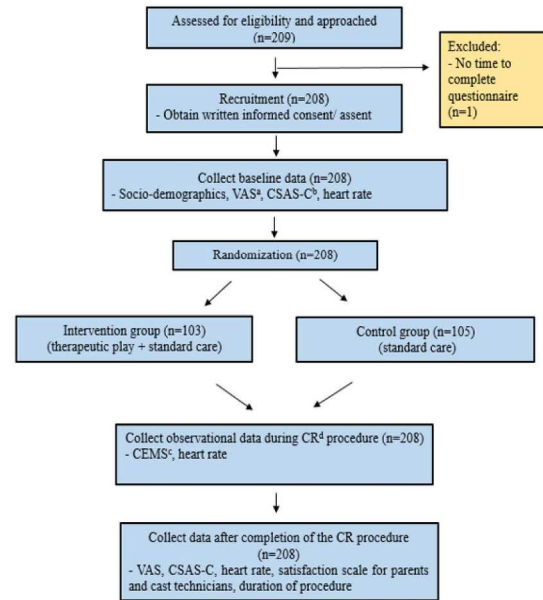

Note:

<sup>a</sup> VAS: Visual Analogue Scale

<sup>b</sup> CSAS-C: The short form Chinese version of the State Anxiety Scale for Children

<sup>c</sup> CEMS: Children's Emotional Manifestation Scale

<sup>d</sup> CR: Cast-removal

The CONSORT diagram of this study

210x297mm (300 x 300 DPI)



1  
2  
3 **Title of proposal:** The stress-reducing effects of therapeutic play on children undergoing cast-  
4 removal procedure.  
5  
6  
7

### 8 **Background**

9  
10 It is common for children to display stressed behaviour in clinical settings, even during painless  
11 medical procedures such as cast-removal. Many behavioural and physiological manifestations of  
12 anxiety in children are associated with their compliance with the medical procedures and thus the  
13 recovery outcomes (Felder-Puig et al., 2003) and the quality of care (Tyson, Bohl, & Blickman,  
14 2014). Researchers (Li, Lopez, & Lee, 2007) has pointed out that lack of self-control and limited  
15 cognitive capabilities are two main factors associated with children's anxiety and that psychosocial  
16 preparation of the children through therapeutic play could help them gain a sense of self-control  
17 and achieve lower anxiety levels.  
18  
19  
20  
21  
22

23 Therapeutic play is a set of structured activities that are designed according to the subject's age,  
24 cognitive development and health-related issues, to promote emotional and physical well-being in  
25 hospitalized children (Vessey & Mahon, 1990). Extensive studies have supported therapeutic play  
26 as an effective pre-operative preparation for both children and parents in reducing fear and anxiety  
27 (Christian, Russ, & Short, 2011; Nyugen, & Thaller, 2008). Care providers should consider the  
28 human rights of children, and provide age-appropriate information to aid understanding of the  
29 disease and the interventions employed.  
30  
31  
32  
33  
34

35 Brewer et al. (2006) evaluated the effectiveness of therapeutic play in a double-blind intervention  
36 study. The findings showed that preparation with role rehearsal and medical play could lower  
37 anxiety levels in children following elective day surgery. Additionally, a recent randomized,  
38 controlled trial (RCT) (Tyson et al., 2014) found that therapeutic play could enhance satisfaction,  
39 not only to children but also in the parents and healthcare providers. However, the efficacy of  
40 therapeutic play are yet to be determined because the reported studies were based mainly on  
41 clinical observations and most of the play manuals, which should have set out specific procedures  
42 and improved fidelity, were not fully described (Brewer et al., 2006; Stevenson et al., 2005; Tyson  
43 et al., 2014). Researchers have emphasized the need for further objective data-gathering studies on  
44 the scope of procedures in an out-patient setting.  
45  
46  
47  
48  
49  
50

51 In summary, the comprehensive value of therapeutic play—in terms of impact on the child, family  
52 and medical institution as a whole—remains largely unexplored in the literature. Our literature  
53 search revealed no reports of prospective and randomized controlled studies of the effectiveness  
54  
55  
56  
57  
58  
59  
60

1  
2  
3 of therapeutic play among Chinese children undergoing cast-removal procedures, let alone among  
4 Hong Kong Chinese.  
5  
6  
7  
8

### 9 **Aims**

10 The aim of this study is to examine the impact of the therapeutic play on the psychological stress  
11 of paediatric patients during cast-removal (CR) procedures in an orthopaedic out-patient clinic in  
12 Hong Kong. The satisfaction ratings of parents and healthcare providers in respect of these services  
13 will also be examined.  
14  
15  
16

### 17 **Methods**

#### 18 **Design**

19 This is a two-arm randomized controlled trial. Eligible children undergoing the CR procedure will  
20 be randomly allocated to either the experimental or control groups in a 1:1 ratio. The child and  
21 accompanying parent in the experimental group will receive therapeutic play intervention, and the  
22 control group will receive routine care only. All participants will be assessed on three occasions:  
23 before, during, and after completion of the CR procedure. Please refer to Figure 1 for the study  
24 protocol.  
25  
26  
27  
28  
29  
30  
31  
32  
33  
34  
35  
36  
37  
38  
39  
40  
41  
42  
43  
44  
45  
46  
47  
48  
49  
50  
51  
52  
53  
54  
55  
56  
57  
58  
59  
60

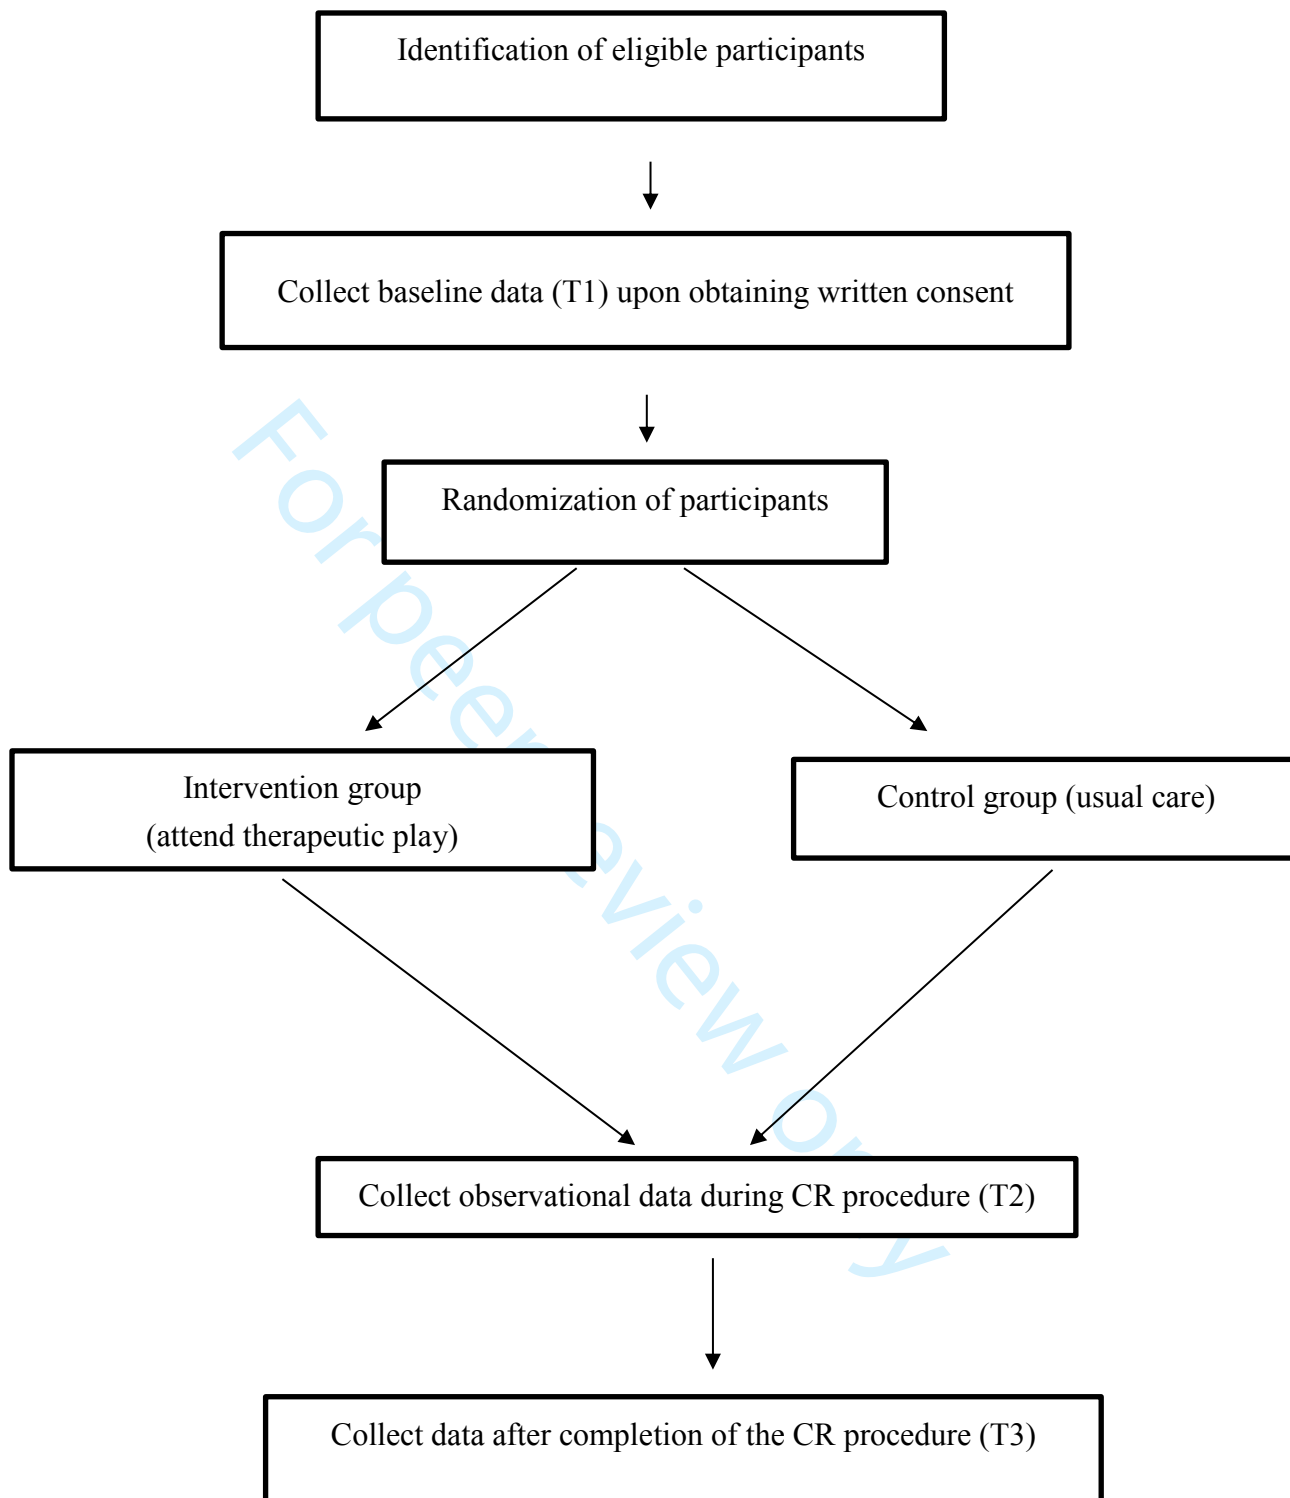

CR = cast removal

Figure 1. Study Protocol

## Research Hypotheses

The research objectives are to examine whether, in CR procedures, there are significant differences between the Intervention and Control groups in:

1. children's anxiety levels
2. children's emotional distress levels
3. children's heart rates
4. length of procedure
5. satisfaction levels of parents and technicians in respect of the procedures.

## Settings

This study will be conducted in the orthopaedic out-patient department (OPD) of a regional teaching hospital in Hong Kong. A cast room in the OPD performs approximately 20 cast-removal procedures monthly. At the time of this proposal, the standard of regimen in this OPD does not include therapeutic play services. The cast technicians attend to paediatric patients every Wednesday afternoon. They receive limited training on the developmental needs of children in their profession.

## Sample

Children and their accompanying parents, who are waiting for the cast room procedure, will be invited to participate in the study if (i) the children are 3–12 years of age and (ii) the parents are able to speak Cantonese and read Chinese. Children will be excluded if they have had a cast removed within 3 months and demonstrate obvious neurological or developmental problems during cognitive assessment by a play specialist.

The rationale for selecting 3–12-year-old is that the number of children having cast room procedure within this age range in Hong Kong is higher than for other age groups. In fact, according to Piaget's (1963) theory of cognitive development, children from 3 to 7 years of age belong to the same pre-operational stage, while those in the age range 8–12 years belong to the concrete operational stage. In addition, according to Erickson (1963), children in the same age group fall in the same stage of psychosocial development. Accordingly, randomization of participants to the experimental (E) or control (C) groups will be stratified by the two age groups: 3–7 and 8–12 years. Serially numbered opaque sealed envelopes containing the grouping identifier (E or C) for each age group will be prepared in advance by an independent statistician using computer generated random codes. The group allocation of the recruited children will be assigned according to their

ages and sequence of enrolment in the study and the grouping identifier contained in the corresponding numbered envelopes.

The sample size of the study is determined to detect at least a medium effect size of Cohen's  $d = 0.5$  between the experimental and control groups. According to Cohen (1992), 64 subjects in each group will be sufficient to detect a medium effect of 0.5 with 80% power at 5% level of significance. Taking into account of up to a 15% attrition rate and stratified the study by age, seventy-five children each will be recruited for the experimental and control groups per stratum by age (3–7 and 8–12 years).

### **Interventions**

The research team discuss the study protocol and an experienced hospital play specialist (HPS) will conduct all interventions in the study during her regular shift. Each child who is assigned to the Intervention group will receive an initial assessment, who will individualize the therapeutic activities based on children's psycho-cognitive development (Erikson, 1963; Piaget, 1963) and general condition. Duration and type of intervention will be varied, based on the assessment of the child's needs, but will usually be completed within 30 minutes. The content of the therapeutic play has two main components: preparation play and distraction play (Blaine, 1999).

#### **Preparation Play**

Preparation play consisting of two parts of intervention will be conducted before the CR procedure:

##### ***Part I: information given***

The children and parents should be well prepared by information supplied about the procedure and the choices of behaviour management. The hospital jargon were translated into ordinary language and in giving explanations in terms that suit the developmental level of the child (Brown et al., 1997). The preparation phase will be implemented individually, with their parents, in a service room. Information about the procedure will be provided, such as: (i) Why must the procedure be done? (ii) Where will the procedure take place? (iii) What will be happening? and (iv) How will it feel? Multiple coping strategies will also be introduced, so as to allow the parent and child to choose the one appropriate to them (Stephens, Barkey, & Hall, 1999); for example: (i) whether or not to watch the procedure, (ii) to pick something nice to think about and (iii) to sing a song. Choices of age-appropriate toys with specified playing activities will also be given to promote the coping strategies of the children.

##### ***Part II: rehearsal of the procedure***

1  
2  
3 After verbal explanation, a demonstration of the cast-removal procedure will be conducted, using  
4 a doll. Examples of such a demonstration are:  
5  
6  
7

- 8 • Show a dummy circular-saw cast cutter with appropriate sound effect
- 9 • Play with a doll and explain how the cast is cut open by the circular saw
- 10 • Reassure the child that the saw will not cut his or her skin if he or she follows the instruction  
11 not to move
- 12 • Explain that, when the cast is cut, the child may feel vibrations or tingling, feel warmth, and  
13 see chalky dust flying
- 14 • Describe the use of spreaders and scissors to finish removing the cast
- 15 • Explain how, after the cast is open, the child's skin may appear scaly and dirty and the child's  
16 arm or leg may be a little stiff when he or she first tries to move it; also that the arm or leg may  
17 seem light because the cast was heavy.  
18  
19  
20  
21  
22  
23

24 Each child will be asked to role-play how he or she would respond to the procedure after the  
25 demonstration. During the session, parents and children will be encouraged to raise their concerns  
26 or ask any questions about the procedure. The preparation intervention will usually take 10–  
27 15mins to complete.  
28  
29  
30

### 31 **Distraction Play**

32 Support will be given to the children and parents throughout the cast-removal procedure by giving  
33 distraction play intervention. The aim is to focus children's attention away from the medical  
34 procedure. Methods of distraction include visual distraction, auditory distraction, deep breathing  
35 exercises, tactile stimulation, counting/singing or verbal interaction. The choice of the distraction  
36 method the children's choices (Doellman, 2003). Parental presence and involvement will be  
37 supported, and praise will be given to any successful self-control exhibited by the child. The  
38 conclusion of the procedure will be indicated by offering the child a reward (sweets or stickers).  
39  
40  
41  
42  
43  
44

### 45 **Measures**

#### 46 **A visual analogue scale (Appendix I)**

47 A visual analogue scale (VAS) will be used to assess the anxiety levels of children aged 3–7. The  
48 VAS is a 10 cm horizontal line anchored by the words "not worried" (low score) at one end and  
49 "very worried" (high score) at the other, with different facial expressions drawn along the line.  
50 Children aged between 5 and 7 will be asked to indicate their levels of anxiety by moving a pointer  
51 over the line. Accompanying parent(s) will rate the anxiety levels of children aged 3–4, with higher  
52  
53  
54  
55  
56  
57  
58  
59  
60

1  
2  
3 scores indicating greater anxiety. The VAS is a widely used scale which is found to be a reliable  
4 and valid tool for measuring subjective feelings of children aged 5 to 7 (Bringuier *et al.*, 2009).  
5  
6  
7

### 8 **The short form of the Chinese version of the State Anxiety Scale for Children (CSAS-C)** 9 **(Appendix II)**

10 The CSAS-C was a 10-item self-report scale to measure the levels of anxiety among children aged  
11 8-12 in busy clinical settings (Li & Lopez, 2007). The content validity of the scale has been  
12 empirically tested and the Cronbach's alpha value was 0.83. This is a 3-point Likert scale with  
13 total scores ranging from 10 to 30. Higher scores indicate greater anxiety levels (Li & Lopez, 2007).  
14  
15  
16  
17

### 18 **Children's Emotional Manifestation Scale (CEMS) (Appendix III)**

19 The emotional behaviours of children during CR procedures will be documented using the CEMS.  
20 The CEMS was developed by Li and Lopez in 2005. It comprises five observable emotional  
21 behaviours, categorized as 'Facial expression', 'Vocalization', 'Activity', 'Interaction' and 'Level  
22 of Co-operation'. The CEMS score is obtained by reviewing the descriptions of behaviour in each  
23 category and selecting the number that most closely represents the observed behaviour at the time  
24 the subject experiences the most distress. Each category is scored from one to five. Observable  
25 behaviours in each category of the CEMS are explained in detail with an operational definition, so  
26 that the observer, a research nurse (RN) in this study, using this scale has relatively clear-cut  
27 criteria for assessment. The sum of the numbers obtained for each category is the total score, which  
28 will be between 5 and 25. Higher scores indicate the manifestation of more negative (distressed)  
29 emotional behaviours. The evaluation of the psychometric properties of the CEMS demonstrated  
30 adequate inter-rater reliability, high internal consistency, good content validity and excellent  
31 convergent validity (Li & Lopez, 2005).  
32  
33  
34  
35  
36  
37  
38  
39  
40

### 41 **Satisfaction Scale**

42 Two questionnaires in English, developed by Tyson and colleagues (2014), will be adopted to  
43 measure parents' (Appendix IV) and cast technicians' (Appendix V) satisfaction levels. The RN  
44 will work with the research team to translate the English questionnaire into a Chinese version, with  
45 reference to a back-translation method recommended by Brislin (1970).  
46  
47  
48  
49

50 The original questionnaire for the parent is a 10-item scale to measure parents' satisfaction with  
51 the child life services. Each item will be rated by a 5-point scale ranging from 1 = strongly disagree  
52 to 5 = strongly agree. A higher score indicates a higher level of the satisfaction. Examples of the  
53 statements used are 'My child's emotional needs were met' and 'I am satisfied with the care  
54 provided to my child' (Appendix IV). The perception of the cast technician on the service will be  
55  
56  
57  
58  
59  
60



1  
2  
3 examined by eight items, with each being rated on a scale from 1 = strongly disagree to 5 = strongly  
4 agree. Examples of the statements used are ‘The child was co-operative’ and ‘The child engaged  
5 in distraction’ (Appendix V).  
6  
7

### 8 9 **Heart rate monitoring**

10 A standard automatic heart rate monitoring machine, available in the study hospital, will be used  
11 to measure children’s heart rates to assess their physiological responses to CR procedures.  
12 Children’s heart rates have been considered to be objective and definitive indicators for indirect  
13 assessment of anxiety level in children in previous studies (Augustin & Hains 1996; Panda *et al.*  
14 1996; Li & Lopez 2007).  
15  
16  
17  
18

### 19 **A demographic sheet**

20 A questionnaire developed by the research team will be used to measure the socio-demographic  
21 and clinical variables of the parent and their child. The items for children include age, sex, reason  
22 for cast application and number of hospital admissions. The accompany parent’s age, sex,  
23 educational level and working status will also be obtained.  
24  
25  
26  
27

28  
29 The cast technician’s demographic information including age, sex and years of working experience  
30 will also be collected by the RN.  
31  
32

### 33 **Data Collection Procedure**

34 Children having their casts removed will be identified outside the cast room of the study OPD by  
35 the RN. If the child meets the inclusion criteria for recruitment, permission for the child to  
36 participate will be obtained from the accompanying parent. The RN will then conduct the interview  
37 with consenting parent–child pairs in a private room. The children of the consenting parents in  
38 both groups are asked to indicate how anxious they are by filling in either the VAS anxiety scale  
39 (for children between 5–7 years old) or the short form of the CSAS-C (for children aged between  
40 8–12) ( Li & Lopez, 2007). The RN will acquire demographic and clinical data from the parents.  
41 She will also ask the parents of children aged under 5 to use the VAS scale to indicate their child's  
42 perceived anxiety level. Children's heart rates will also be monitored for 1 minute, using a standard  
43 automatic heart rate monitoring machine at the end of the interview.  
44  
45  
46  
47  
48  
49

50 According to the subject allocation scheme, children in the Control group will receive routine care  
51 in the CR room A, whereas those in the Intervention group will additionally receive therapeutic  
52 play intervention conducted by the HPS in the CR room B. The parents and children will be asked  
53 not to discuss the purpose of the study with cast technician in the cast room during the informed  
54 consent process.  
55  
56  
57  
58  
59  
60



In the CR room, the RN will take the 1-minute recording of the child's heart rate when the cast technician starts sawing the cast of the child. The RN will also rate the child's signs of distress from the time the saw touches the cast until the limb is free from the cast, by means of the CEMS (Li & Lopez 2005). The length of the whole CR procedure for each child will also be recorded by the RN. The timing, duration, and nature of play for each child will be documented in a log book. After the completion of the CR procedure, The RN will take the child's heart rate for 1 min and then ask the parents and the cast technician to fill in their respective satisfaction scales to reflect their perceptions of the delivery of the CR procedure.

The RN will give a \$30 dollar coupon to the parent upon completion of data collection.

A pilot study on 5 pairs of eligible parent-child dyad will be performed to assess the feasibility of the data collection plan and to pre-test the questionnaires. The respondents' comments on and impressions of the pilot study will help the research team to refine or revise the study plan (Polit *et al.*, 2013). Please refer to the outline of data collection in Table 1.

**Table 1. The plan of data collection by the research nurse**

|                                                                                                                                                                | Pre-test data upon consent given (T1) | Observational data during procedure (T2) | Post-test data after procedure (T3) |
|----------------------------------------------------------------------------------------------------------------------------------------------------------------|---------------------------------------|------------------------------------------|-------------------------------------|
| Demographic and clinical variables                                                                                                                             | X                                     |                                          |                                     |
| VAS anxiety scale for children 3–7 years old;<br>The short form of the Chinese version of the State Anxiety Scale for Children (CSAS-C) for children aged 8–12 | X                                     |                                          | X                                   |
| Children's Emotional Manifestation Scale                                                                                                                       |                                       | X                                        |                                     |
| 1 minute heart rate recorded by an automatic heart rate monitoring machine.                                                                                    | X                                     | X                                        | X                                   |
| Parent satisfaction scale                                                                                                                                      |                                       |                                          | X                                   |
| Staff satisfaction scale                                                                                                                                       |                                       |                                          | X                                   |

|                     |  |   |  |
|---------------------|--|---|--|
| Length of procedure |  | X |  |
|---------------------|--|---|--|

### Data Analysis

All data will be analysed using IBM SPSS for Windows, Version 22. Descriptive statistics such as mean, standard deviation, median, inter-quartile range, frequency and percentage, as appropriate, will be used to present the participants' socio-demographics and outcome measurements. Pearson's chi-squared test and student's *t*-test will be used as appropriate for comparing the baseline differences between the two groups. Generalized estimating equations (GEE) model will be used to compare the outcome measures across time between the two groups. GEE model can account for intra-correlated repeated measures data and accommodated missing data, provided the data are missing at random. All statistical analyses are two-sided and level of significance will be set at 0.05.

### Ethical Issues

Ethical approval will be sought from the Ethical Committees of the University and the study hospital prior to conducting the study. The purpose and details of the study will be clearly provided to the accompanying parents before the RN obtains their written consent. Maintenance of confidentiality and anonymity of data gained will also be assured. Participants will be informed that the quality of care will not be affected by their participation status. Please refer to the details of the information sheet and consent form in Appendix VII.

### Timeline

#### Timetable of the 20-month project

| Month                                    | 1 | 2 | 3 | 4-16 |   |   |   | 17 | 18 | 19 | 20 |
|------------------------------------------|---|---|---|------|---|---|---|----|----|----|----|
| RN training & literature review          | ★ | ★ |   |      |   |   |   |    |    |    |    |
| Questionnaires development & pilot study |   | ★ | ★ |      |   |   |   |    |    |    |    |
| Data collection                          |   |   |   | ★    | ★ | ★ | ★ | ★  | ★  |    |    |
| Data entry & data analyses               |   |   |   |      |   |   |   | ★  | ★  | ★  |    |
| Report writing                           |   |   |   |      |   |   |   |    |    | ★  | ★  |

Note: Based on recruiting 20 cases per month

### Significance

Removal of casts is a frightening procedure for children (Johnson et al., 1975), and studies on psychosocial care for children receiving the procedure are limited. This is the first study of this kind among Hong Kong Chinese children in an orthopaedic out-patient clinic. The findings will inform policy makers on the development and inclusion of therapeutic play interventions in paediatric out-patient healthcare settings.

For peer review only

## References

- Augustin, P. & Hains, A. A. (1996). Effect of music on ambulatory surgery patients' pre-operative anxiety. *AORN Journal* 63, (750),753–58.
- Blaine, S. (1999). The where, why, and how: Coping kits and distraction techniques. *Child Life Focus*, 1, 1–6.
- Brewer, S., Gleditsch, S. L., Syblik, D., Tietjens, M, E., & Vacik, H. W. (2006). Pediatric anxiety: child life intervention in day surgery. *Journal of Pediatric Nursing*, 21(1), 13–22.
- Bringuier, S., Dadure, C., Raux, O., Dubois, A., Picot, M. C., & Capdevila, X. (2009). The perioperative validity of the visual analogue anxiety scale in children: a discriminant and useful instrument in routine clinical practice to optimize post-operative pain management. *Anesthesia & Analgesia*, 109(3), 737–744.
- Brislin, R. W. (1986). The wording and translation of research instrument. In W. J. Lonner & J. W. Berry (Eds.). *Field methods in cross-cultural research*. (pp. 137-164). Beverly Hills, CA.: Sage.
- Brown C., Wilson, J. (1997). *Guidelines for the Development of Child Life Programs* (2<sup>nd</sup> ed). Rockville, MD, USA: Child Life Council, Inc.
- Christian, K. M., Russ, S., & Short, E. J. (2011). Pretend play processes and anxiety: Considerations for the play therapist. *International Journal of Play Therapy*, 20(4), 179–192.
- Doellman, D. (2003). Pharmacological versus nonpharmacological techniques in reducing venipuncture psychological trauma in paediatric patients. *Journal of Infusion Nursing*, 26(2), 103–109.
- Erikson, E. (1963). *Childhood and society* (2nd ed.). New York: Norton & Company.
- Felder-Puig R., Maksys A., Noestlinger C., Gadner, H., Stark, H., Pfluegler, A., & Topf. R. (2003). Using a children's book to prepare children and parents for elective ENT surgery: Results of a randomized clinical trial. *International Journal of Pediatric Otorhinolaryngology*, 67, 35–41.
- Johnson, P. A. & Stockdate, D. F (1975). Effects of puppet therapy on palmar sweating of hospitalized children. *Johns Hopkins Medical Journal*, 137, 1–5.
- Li, H. C. W., & Lopez, V. (2005). Children's Emotional Manifestation Scale: development testing. *Journal of Clinical Nursing*, 14(2), 223–229.

- 1  
2  
3 Li, H. C. W., & Lopez, V. (2007). Development and validation of a short form of the Chinese  
4 version of the State Anxiety Scale for Children. *International Journal of Nursing Studies*,  
5 44(4), 566–573.  
6  
7  
8 Li, H. C., Lopez, V., & Lee, T. L. (2007). Effects of pre-operative therapeutic play on outcomes  
9 of school-age children undergoing day surgery. *Research in Nursing & Health*, 30(3), 320-  
10 332.  
11  
12  
13 Panda, N., Bajaj, A., Pershad, D. Yaddanapudi, L. N. & Chari, P. (1996). Pre-operative anxiety:  
14 effect of early or late position on the operating list. *Anaesthesia*, 51(4), 344–346.  
15  
16  
17 Piaget, J. (1963). *The origins of intelligence in children*. New York: Norton.  
18  
19 Polit, D. F. & Beck, C. T. (2013). *Essentials of nursing research: Appraising evidence for nursing*  
20 *practice*. (8th ed.). Philadelphia: Lippincott Williams & Wilkins.  
21  
22 Stephens, B., Barkey, M., & Hall, H. (1999). Techniques to comfort children during stressful  
23 procedures. *Advances in Mind-Body Medicine*, 15, 49–60.  
24  
25  
26 Stevenson, M. D., Bivins, C. M., O'Brien, K., & Gonzalez del Rey, J. A. (2005). Child life  
27 intervention during angiocatheter insertion in the paediatric emergency department. *Pediatric*  
28 *Emergency Care*, 21(11), 712–718.  
29  
30  
31 Nyugen, T. J., & Thaller, S. (2008). Psychological rehabilitation of paediatric burn  
32 patients. *Journal of Craniofacial Surgery*, 19(4), 882–87.  
33  
34  
35 Tyson, M. E., Bohl, D. D., & Blickman, J. G. (2014). *A randomized controlled trial: Child life*  
36 *services in paediatric imaging*. Springer-Verlag.  
37  
38  
39 Vessey, J. A., & Mahon, M. M. (1990). Therapeutic play and the hospitalised child. *Journal of*  
40 *Pediatric Nursing*, 5(5), 328–333.  
41  
42  
43  
44  
45  
46  
47  
48  
49  
50  
51  
52  
53  
54  
55  
56  
57  
58  
59  
60

1  
2  
3  
4  
5  
6  
7  
8  
9  
10  
11  
12  
13  
14  
15  
16  
17  
18  
19  
20  
21  
22  
23  
24  
25  
26  
27  
28  
29  
30  
31  
32  
33  
34  
35  
36  
37  
38  
39  
40  
41  
42  
43  
44  
45  
46  
47  
48  
49  
50  
51  
52  
53  
54  
55  
56  
57  
58  
59  
60

### Appendix I

#### A 10-point level Visual Analogue Scale (VAS)

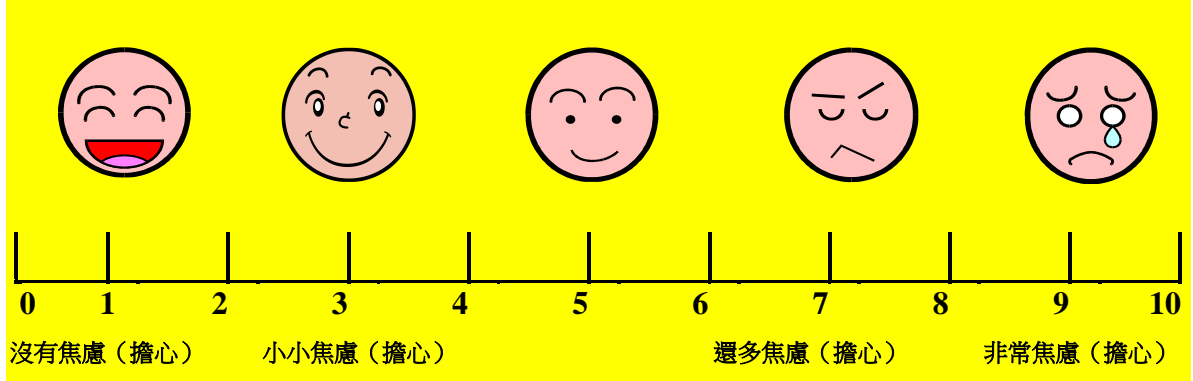

## Appendix II

### Short-Form of the Chinese version of the State Anxiety Scale

以下是一些男孩子和女孩子用來形容自己的句子。請小心閱讀每一句，然後在每句子的右方圈出最能表達你現時感覺的字句。答案是沒有分對或錯的。不要花太多時間在任何句子上，只要將最能表達你現時感覺的字句圈出來就可以了。

- |              |      |    |     |
|--------------|------|----|-----|
| 1. 我感到.....  | 十分愉快 | 愉快 | 不愉快 |
| 2. 我感到.....  | 十分不安 | 不安 | 無不安 |
| 3. 我感到.....  | 十分緊張 | 緊張 | 不緊張 |
| 4. 我感到.....  | 十分平靜 | 平靜 | 不平靜 |
| 5. 我感到.....  | 十分輕鬆 | 輕鬆 | 不輕鬆 |
| 6. 我感到.....  | 十分擔心 | 擔心 | 不擔心 |
| 7. 我感到.....  | 十分害怕 | 害怕 | 不害怕 |
| 8. 我感到.....  | 十分快樂 | 快樂 | 不快樂 |
| 9. 我感到.....  | 十分煩惱 | 煩惱 | 不煩惱 |
| 10. 我感到..... | 十分開心 | 開心 | 不開心 |

----- 此問卷到此完 -----

## Appendix 3

## The Children Emotional Manifestation Scale

|                              | 1                                                                                 | 2                                                                                 | 3                                                                                 | 4                                                                                  | 5                                                                                   | Scored |
|------------------------------|-----------------------------------------------------------------------------------|-----------------------------------------------------------------------------------|-----------------------------------------------------------------------------------|------------------------------------------------------------------------------------|-------------------------------------------------------------------------------------|--------|
| <b>Facial Expression</b>     |  |  |  |  |  |        |
| <b>Vocalization</b>          | No Crying                                                                         | Watery eyes                                                                       | Whimpering                                                                        | Crying                                                                             | Hard Crying or Non-stop Screaming                                                   |        |
| <b>Activity</b>              | Calm                                                                              | Annoying                                                                          | Irritable                                                                         | Restlessness                                                                       | Agitation                                                                           |        |
| <b>Interaction</b>           | Verbal interaction                                                                | Non-verbal response only                                                          | Avoid interaction                                                                 | Mild verbal protest                                                                | Strong verbal protest                                                               |        |
| <b>Level of Co-operation</b> | Active participation                                                              | Passive participation                                                             | Withdrawal                                                                        | Extreme resistance                                                                 | Disruptive behaviour                                                                |        |



## Appendix IV

## Parent Satisfaction Scale (Chinese version)

## 家長滿意程度調查

香港中文大學現在正進行一項關於拆除石膏程序的研究，希望了解病人家屬和職員對這項服務的滿意程度。以下是關於剛才拆除石膏過程的相關問題，請為每條問題圈出符合你的同意程度的號碼。答案純屬個人意見，沒有標準答案。

(1 = 非常不同意；5 = 非常同意)

|    |                      | 非常不同意 | 不同意 | 中立 | 同意 | 非常同意 |
|----|----------------------|-------|-----|----|----|------|
| 1  | 整個程序用了我的孩子能明白的語言去講解。 | 1     | 2   | 3  | 4  | 5    |
| 2  | 我孩子的情緒有被照顧到。         | 1     | 2   | 3  | 4  | 5    |
| 3  | 職員有關顧到我的孩子是否感到舒適。    | 1     | 2   | 3  | 4  | 5    |
| 4  | 我知道要怎樣去幫助我的孩子。       | 1     | 2   | 3  | 4  | 5    |
| 5  | 職員有關顧到我的疑問和憂慮。       | 1     | 2   | 3  | 4  | 5    |
| 6  | 職員尊重我對我孩子的理解。        | 1     | 2   | 3  | 4  | 5    |
| 7  | 我對我孩子所受到的照顧感到滿意。     | 1     | 2   | 3  | 4  | 5    |
| 8  | 我會推薦這個服務給其他人。        | 1     | 2   | 3  | 4  | 5    |
| 9  | 職員都是友善和樂於幫忙的。        | 1     | 2   | 3  | 4  | 5    |
| 10 | 職員們好好地共同合作去照顧我的孩子。   | 1     | 2   | 3  | 4  | 5    |

### Parent Satisfaction Scale

These are the questions in regards to the process of pop removal, please rate each question on scale 1-5

|    |                                                                        | <b>STRONGLY<br/>DISAGREE</b> | <b>DIS-<br/>AGREE</b> | <b>NEITHER<br/>AGREE<br/>NOR<br/>DISAGREE</b> | <b>AGREE</b> | <b>STRONGLY<br/>AGREE</b> |
|----|------------------------------------------------------------------------|------------------------------|-----------------------|-----------------------------------------------|--------------|---------------------------|
| 1  | Appropriate wordings was used to let my kid to understand the process. | 1                            | 2                     | 3                                             | 4            | 5                         |
| 2  | My kid's emotion was looked well after by the team.                    | 1                            | 2                     | 3                                             | 4            | 5                         |
| 3  | Staff concerned about the comfortability of my kid.                    | 1                            | 2                     | 3                                             | 4            | 5                         |
| 4  | I knew how to assist with my kid.                                      | 1                            | 2                     | 3                                             | 4            | 5                         |
| 5  | Staff concerned about my questions and worries.                        | 1                            | 2                     | 3                                             | 4            | 5                         |
| 6  | Staff respect my knowledge to my kid.                                  | 1                            | 2                     | 3                                             | 4            | 5                         |
| 7  | I satisfied with the care received from the team.                      | 1                            | 2                     | 3                                             | 4            | 5                         |
| 8  | I would recommend this hospital to others.                             | 1                            | 2                     | 3                                             | 4            | 5                         |
| 9  | Staff were friendly and willing to help.                               | 1                            | 2                     | 3                                             | 4            | 5                         |
| 10 | Staff cooperated well to care my kid.                                  | 1                            | 2                     | 3                                             | 4            | 5                         |

**Appendix IV**  
**Staff Satisfaction Scale (Chinese version)**  
**職員滿意程度調查**

香港中文大學現在正進行一項關於拆除石膏程序的研究，希望了解病人家屬和職員對這項服務的滿意程度。以下是關於剛才拆除石膏過程的相關問題，請為每條問題圈出符合你的同意程度的號碼。答案純屬個人意見，沒有標準答案。

(1 = 非常不同意；5 = 非常同意)

|   |                       | 非常不同意 | 不同意 | 中立 | 同意 | 非常同意 |
|---|-----------------------|-------|-----|----|----|------|
| 1 | 孩子明白到甚麼事情將會發生。        | 1     | 2   | 3  | 4  | 5    |
| 2 | 孩子表現得合作。              | 1     | 2   | 3  | 4  | 5    |
| 3 | 孩子的情緒有被照顧到。           | 1     | 2   | 3  | 4  | 5    |
| 4 | 孩子的注意力已被分散。           | 1     | 2   | 3  | 4  | 5    |
| 5 | 家長明白怎樣去幫助他們的孩子。       | 1     | 2   | 3  | 4  | 5    |
| 6 | 進行拆除石膏程序的環境符合孩子的需要。   | 1     | 2   | 3  | 4  | 5    |
| 7 | 我對我們團隊所供給這個孩子的照顧感到滿意。 | 1     | 2   | 3  | 4  | 5    |
| 8 | 家人對於孩子所受到的照顧感到滿意。     | 1     | 2   | 3  | 4  | 5    |

### Staff Satisfaction Scale

These are the questions in regards to the process of pop removal, please rate each question on scale 1-5

|   |                                                               | <b>STRONGLY<br/>DISAGREE</b> | <b>DISAGREE</b> | <b>NEITHER<br/>AGREE<br/>NOR<br/>DISAGREE</b> | <b>AGREE</b> | <b>STRONGLY<br/>AGREE</b> |
|---|---------------------------------------------------------------|------------------------------|-----------------|-----------------------------------------------|--------------|---------------------------|
| 1 | The kid understood what would happen next.                    | 1                            | 2               | 3                                             | 4            | 5                         |
| 2 | The kin was cooperative.                                      | 1                            | 2               | 3                                             | 4            | 5                         |
| 3 | The kid's emotion was looked well after by the team.          | 1                            | 2               | 3                                             | 4            | 5                         |
| 4 | The kid was distracted.                                       | 1                            | 2               | 3                                             | 4            | 5                         |
| 5 | Parents knew how to help with their kids                      | 1                            | 2               | 3                                             | 4            | 5                         |
| 6 | The venue for POP removal was appropriate to kids' needs      | 1                            | 2               | 3                                             | 4            | 5                         |
| 7 | I am satisfied with the cared provided to the kid.            | 1                            | 2               | 3                                             | 4            | 5                         |
| 8 | Kid's family was satisfied with the care received by the kid. | 1                            | 2               | 3                                             | 4            | 5                         |

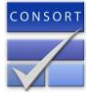

## CONSORT 2010 checklist of information to include when reporting a randomised trial\*

| Section/Topic                    | Item No | Checklist item                                                                                                                                                                              | Reported on page No |
|----------------------------------|---------|---------------------------------------------------------------------------------------------------------------------------------------------------------------------------------------------|---------------------|
| <b>Title and abstract</b>        |         |                                                                                                                                                                                             |                     |
|                                  | 1a      | Identification as a randomised trial in the title                                                                                                                                           | 1                   |
|                                  | 1b      | Structured summary of trial design, methods, results, and conclusions (for specific guidance see CONSORT for abstracts)                                                                     | 4                   |
| <b>Introduction</b>              |         |                                                                                                                                                                                             |                     |
| Background and objectives        | 2a      | Scientific background and explanation of rationale                                                                                                                                          | 6                   |
|                                  | 2b      | Specific objectives or hypotheses                                                                                                                                                           | 7                   |
| <b>Methods</b>                   |         |                                                                                                                                                                                             |                     |
| Trial design                     | 3a      | Description of trial design (such as parallel, factorial) including allocation ratio                                                                                                        | 8                   |
|                                  | 3b      | Important changes to methods after trial commencement (such as eligibility criteria), with reasons                                                                                          | N/A                 |
| Participants                     | 4a      | Eligibility criteria for participants                                                                                                                                                       | 8                   |
|                                  | 4b      | Settings and locations where the data were collected                                                                                                                                        | 8                   |
| Interventions                    | 5       | The interventions for each group with sufficient details to allow replication, including how and when they were actually administered                                                       | 10                  |
| Outcomes                         | 6a      | Completely defined pre-specified primary and secondary outcome measures, including how and when they were assessed                                                                          | 11-13               |
|                                  | 6b      | Any changes to trial outcomes after the trial commenced, with reasons                                                                                                                       | N/A                 |
| Sample size                      | 7a      | How sample size was determined                                                                                                                                                              | 9                   |
|                                  | 7b      | When applicable, explanation of any interim analyses and stopping guidelines                                                                                                                | N/A                 |
| <b>Randomisation:</b>            |         |                                                                                                                                                                                             |                     |
| Sequence generation              | 8a      | Method used to generate the random allocation sequence                                                                                                                                      | 9                   |
|                                  | 8b      | Type of randomisation; details of any restriction (such as blocking and block size)                                                                                                         | 9                   |
| Allocation concealment mechanism | 9       | Mechanism used to implement the random allocation sequence (such as sequentially numbered containers), describing any steps taken to conceal the sequence until interventions were assigned | 9                   |
| Implementation                   | 10      | Who generated the random allocation sequence, who enrolled participants, and who assigned participants to interventions                                                                     | 9                   |
| Blinding                         | 11a     | If done, who was blinded after assignment to interventions (for example, participants, care providers, those                                                                                | 21                  |

|    |                          |                                                             |                                                                                                                  |         |
|----|--------------------------|-------------------------------------------------------------|------------------------------------------------------------------------------------------------------------------|---------|
| 1  |                          | assessing outcomes) and how                                 |                                                                                                                  |         |
| 2  | 11b                      | If relevant, description of the similarity of interventions | 7                                                                                                                |         |
| 3  | Statistical methods      | 12a                                                         | Statistical methods used to compare groups for primary and secondary outcomes                                    | 15      |
| 4  |                          | 12b                                                         | Methods for additional analyses, such as subgroup analyses and adjusted analyses                                 | NA      |
| 5  |                          |                                                             |                                                                                                                  |         |
| 6  | <b>Results</b>           |                                                             |                                                                                                                  |         |
| 7  | Participant flow (a      | 13a                                                         | For each group, the numbers of participants who were randomly assigned, received intended treatment, and         | 16      |
| 8  | diagram is strongly      |                                                             | were analysed for the primary outcome                                                                            |         |
| 9  | recommended)             | 13b                                                         | For each group, losses and exclusions after randomisation, together with reasons                                 | 16      |
| 10 | Recruitment              | 14a                                                         | Dates defining the periods of recruitment and follow-up                                                          | 16      |
| 11 |                          | 14b                                                         | Why the trial ended or was stopped                                                                               | NA      |
| 12 | Baseline data            | 15                                                          | A table showing baseline demographic and clinical characteristics for each group                                 | Table 1 |
| 13 | Numbers analysed         | 16                                                          | For each group, number of participants (denominator) included in each analysis and whether the analysis was      | 16      |
| 14 |                          |                                                             | by original assigned groups                                                                                      |         |
| 15 | Outcomes and             | 17a                                                         | For each primary and secondary outcome, results for each group, and the estimated effect size and its            | 16      |
| 16 | estimation               |                                                             | precision (such as 95% confidence interval)                                                                      |         |
| 17 |                          | 17b                                                         | For binary outcomes, presentation of both absolute and relative effect sizes is recommended                      | NA      |
| 18 | Ancillary analyses       | 18                                                          | Results of any other analyses performed, including subgroup analyses and adjusted analyses, distinguishing       | NA      |
| 19 |                          |                                                             | pre-specified from exploratory                                                                                   |         |
| 20 | Harms                    | 19                                                          | All important harms or unintended effects in each group (for specific guidance see CONSORT for harms)            | NA      |
| 21 |                          |                                                             |                                                                                                                  |         |
| 22 | <b>Discussion</b>        |                                                             |                                                                                                                  |         |
| 23 | Limitations              | 20                                                          | Trial limitations, addressing sources of potential bias, imprecision, and, if relevant, multiplicity of analyses | 20      |
| 24 | Generalisability         | 21                                                          | Generalisability (external validity, applicability) of the trial findings                                        | 20      |
| 25 | Interpretation           | 22                                                          | Interpretation consistent with results, balancing benefits and harms, and considering other relevant evidence    | 19      |
| 26 |                          |                                                             |                                                                                                                  |         |
| 27 | <b>Other information</b> |                                                             |                                                                                                                  |         |
| 28 | Registration             | 23                                                          | Registration number and name of trial registry                                                                   | 5       |
| 29 | Protocol                 | 24                                                          | Where the full trial protocol can be accessed, if available                                                      | 22      |
| 30 | Funding                  | 25                                                          | Sources of funding and other support (such as supply of drugs), role of funders                                  |         |

36  
37 \*We strongly recommend reading this statement in conjunction with the CONSORT 2010 Explanation and Elaboration for important clarifications on all the items. If relevant, we also  
38 recommend reading CONSORT extensions for cluster randomised trials, non-inferiority and equivalence trials, non-pharmacological treatments, herbal interventions, and pragmatic trials.  
39 Additional extensions are forthcoming: for those and for up to date references relevant to this checklist, see [www.consort-statement.org](http://www.consort-statement.org).  
40  
41  
42

# BMJ Open

## Effects of therapeutic play on children undergoing cast-removal procedures: a randomised controlled trial

|                                 |                                                                                                                                                                                                                                                                                                                                                                                                                                                                                                                                                                                                                                                     |
|---------------------------------|-----------------------------------------------------------------------------------------------------------------------------------------------------------------------------------------------------------------------------------------------------------------------------------------------------------------------------------------------------------------------------------------------------------------------------------------------------------------------------------------------------------------------------------------------------------------------------------------------------------------------------------------------------|
| Journal:                        | <i>BMJ Open</i>                                                                                                                                                                                                                                                                                                                                                                                                                                                                                                                                                                                                                                     |
| Manuscript ID                   | bmjopen-2017-021071.R2                                                                                                                                                                                                                                                                                                                                                                                                                                                                                                                                                                                                                              |
| Article Type:                   | Research                                                                                                                                                                                                                                                                                                                                                                                                                                                                                                                                                                                                                                            |
| Date Submitted by the Author:   | 27-Apr-2018                                                                                                                                                                                                                                                                                                                                                                                                                                                                                                                                                                                                                                         |
| Complete List of Authors:       | Wong, Cho Lee; The Chinese University of Hong Kong, Faculty of Medicine, The Nethersole School of Nursing<br>Ip, Wan Yim; The Chinese University of Hong Kong, Faculty of Medicine, The Nethersole School of Nursing<br>Kwok, Blondi Ming Chau; Playright Children's Play Association<br>Choi, Kai Chow; The Chinese University of Hong Kong, Faculty of Medicine, The Nethersole School of Nursing<br>Ng, Bobby King Wah; The Chinese University of Hong Kong, Faculty of Medicine, Department of Orthopaedics & Traumatology<br>Chan, Carmen Wing Han; The Chinese University of Hong Kong, Faculty of Medicine, The Nethersole School of Nursing |
| <b>Primary Subject Heading</b>: | Paediatrics                                                                                                                                                                                                                                                                                                                                                                                                                                                                                                                                                                                                                                         |
| Secondary Subject Heading:      | Health services research                                                                                                                                                                                                                                                                                                                                                                                                                                                                                                                                                                                                                            |
| Keywords:                       | HEALTH SERVICES ADMINISTRATION & MANAGEMENT, ORTHOPAEDIC & TRAUMA SURGERY, Paediatric orthopaedic & trauma surgery < PAEDIATRIC SURGERY                                                                                                                                                                                                                                                                                                                                                                                                                                                                                                             |
|                                 |                                                                                                                                                                                                                                                                                                                                                                                                                                                                                                                                                                                                                                                     |

SCHOLARONE™  
Manuscripts



1  
2  
3 **Title: Effects of therapeutic play on children undergoing cast-removal**  
4  
5 **procedures: a randomised controlled trial**  
6  
7

8 **Authors:**

9 Wong CL, Ip WY, Kwok BMC, Choi KC, Ng BKW, Chan CWH.  
10  
11

12  
13 **Authors' information:**

14 Correspondence to CL Wong:

15 Cho Lee Wong

16 PhD, RN

17 Assistant Professor

18  
19 The Nethersole School of Nursing, Faculty of Medicine, The Chinese University of  
20 Hong Kong, Hong Kong, China

21 Room 824, Esther Lee Building, The Chinese University of Hong Kong, Hong Kong.  
22

23 Telephone number: (852) 3943 8166

24 Fax number: (852) 2603 5269

25 Email: [jojowong@cuhk.edu.hk](mailto:jojowong@cuhk.edu.hk)  
26  
27

28  
29  
30  
31  
32 Wan Yim Ip

33 PhD, RN

34 Associate Professor (Retired)

35  
36 The Nethersole School of Nursing, Faculty of Medicine, The Chinese University of  
37 Hong Kong, Hong Kong, China

38 Email: [wanyimip@cuhk.edu.hk](mailto:wanyimip@cuhk.edu.hk)  
39  
40

41  
42  
43 Kwok Blondi Ming Chau

44 BN, RN

45 Manager (Community & Hospital)

46 Playright Children's Play Association, Hong Kong, China

47 Email: [blondi@playright.org.hk](mailto:blondi@playright.org.hk)  
48  
49

50  
51  
52  
53 Kai Chow Choi

54 PhD  
55  
56  
57  
58  
59  
60



1  
2  
3 Senior Research Fellow

4 The Nethersole School of Nursing, Faculty of Medicine, The Chinese University of

5 Hong Kong, Hong Kong, China

6 Email: [kchoi@cuhk.edu.hk](mailto:kchoi@cuhk.edu.hk)

7  
8  
9  
10  
11 Bobby King Wah Ng

12 M.D.

13 Clinical Professional Consultant of Orthopaedics & Traumatology

14 Department of Orthopaedics & Traumatology, Faculty of Medicine, The Chinese

15 University of Hong Kong, Hong Kong, China

16 Email: [bobng@ort.cuhk.edu.hk](mailto:bobng@ort.cuhk.edu.hk)

17  
18  
19  
20  
21  
22 Carmen Wing Han Chan

23 PhD, RN

24 Vice-Director of Education / Professor

25 The Nethersole School of Nursing, Faculty of Medicine, The Chinese University of

26 Hong Kong, Hong Kong, China

27 Email: [whchan@cuhk.edu.hk](mailto:whchan@cuhk.edu.hk)

28  
29  
30  
31  
32  
33 **Keywords**

34 cast-removal, randomized controlled trial, therapeutic play

35  
36  
37  
38 **Word count**

39 4,700

## Abstract

**Objectives:** To examine (i) the effectiveness of therapeutic play in reducing anxiety and negative emotional manifestations among children undergoing cast-removal procedures; (ii) the satisfaction of parents and cast technicians with cast-removal procedures.

**Design:** A randomised controlled trial.

**Setting:** An orthopaedic outpatient department of a regional teaching hospital in Hong Kong.

**Participants:** Children (n=208) aged 3-12 undergoing cast removal procedure were invited to participate.

**Interventions:** Eligible children were randomly allocated to either the intervention (n=103) or control group (n=105) and stratified by the two age groups (3–7 and 8–12 years). The intervention group received therapeutic play intervention, whereas the control group received standard care only. Participants were assessed on three occasions: before, during, and after completion of the cast removal procedure.

**Outcome measures:** Children's anxiety level, emotional manifestation, and heart rate. The satisfaction ratings of parents and cast technicians with respect to therapeutic play intervention were also examined.

**Results:** Findings suggested that therapeutic play assists children aged 3-7 to reduce anxiety levels with mean differences between the intervention and control group was -20.1 (95% CI: -35.3 to -4.9; p=0.01). Overall, children (aged 3-7 and 8-12) in the intervention groups exhibited fewer negative emotional manifestations than the control group with a mean score difference -2.2 (95% CI: -3.1 to -1.4; p<0.001). Parents and technicians in the intervention group also reported a higher level of satisfaction with the procedures than the control group with a mean score difference

1  
2  
3 of 4.0 (95% CI: -5.6 to 2.3;  $p < 0.001$ ) and 2.6 (95% CI: 3.7 to 1.6;  $p < 0.001$ ),  
4  
5 respectively.

6  
7 **Conclusion:** Therapeutic play effectively reduces anxiety and negative emotional  
8  
9 manifestations among children undergoing cast-removal procedures. The findings  
10  
11 highlight the importance of integrating therapeutic play into standard care, in  
12  
13 particular for children in younger age.  
14

15  
16 **Trial Registration:** The Chinese Clinical Trials Registry: ChiCTR-IOR-15006822.  
17  
18

19  
20 **Strengths and limitations of this study:**  
21

- 22 • This study was one of the first randomised controlled trial to examine the effects of  
23  
24 therapeutic play on children undergo cast-removal procedures, building the evidence  
25  
26 base of therapeutic play.  
27
- 28 • A major limitation was the lack of blinding of outcome assessor. Another limitation  
29  
30 was recruiting children from a single clinical setting so that the generalisability of the  
31  
32 findings may be restricted.  
33
- 34 • The strength of this study included employing both subjective and objective outcome  
35  
36 measures to evaluate the impact of therapeutic play on the psychological state of a  
37  
38 child.  
39  
40  
41  
42  
43  
44  
45  
46  
47  
48  
49  
50  
51  
52  
53  
54  
55  
56  
57  
58  
59  
60

## Introduction

It is common for children to display stressed behaviour in clinical settings even during painless medical procedures such as cast removal.<sup>1 2</sup> The original injuries sustained by the children, added to the unfamiliar environment and the equipment used during the procedures, are likely to provoke anxiety and fear in children of any age. The psychological burden on children not only makes the procedures difficult to perform effectively and efficiently, but may also impose medical risks.<sup>1 3</sup> For instance, an extreme case of death in a child having history of cardiomyopathy during the cast room procedure has been reported.<sup>1</sup> Moreover, anxiety in the children also reduces parents' satisfaction with the care provided.<sup>4</sup> Various strategies such as the use of ear protection or musical lullabies have been used but have not proved very effective.<sup>5 6</sup> Other interventions to reduce anxiety levels in children coping with cast-removal (CR) procedures should be explored.

Therapeutic play is a set of structured activities designed according to the subject's age, cognitive development and health-related issues, to promote emotional and physical well-being in hospitalised children.<sup>7</sup> The therapeutic play activities may include scrapbooking, storytelling, doll demonstration, and art activities. Li and colleagues suggested that hospitalised children who engaged in therapeutic play exhibited fewer negative emotions and experienced lower levels of anxiety than those who did not.<sup>8</sup> A recent systematic review of 14 articles found that therapeutic play was commonly employed for children undergoing invasive procedures, such as elective surgery, vaccination, blood collection or dental treatment in in-patient settings, with positive changes in the behaviour of those who participated in play sessions and a reduction in their anxieties.<sup>9</sup> However, some of these studies were limited by the lack

1  
2  
3 of random assignment of subjects into intervention or control groups. Besides, the  
4 efficacy of therapeutic play interventions is yet to be determined, as the studies  
5 reported were mainly based on clinical observation and most of the play manuals,  
6 which should have set out specific procedures to improve fidelity, were not fully  
7 described.<sup>10-12</sup> Future study that adopt a robust randomized controlled design and  
8 delineate the scope of play procedures is clearly necessary.  
9  
10  
11  
12  
13  
14

15  
16 Our literature search revealed no reports of prospective and randomised controlled  
17 studies on therapeutic play among children undergoing CR procedures, let alone  
18 among Hong Kong Chinese. Most importantly, the comprehensive value of  
19 therapeutic play in paediatric orthopaedic cast rooms - in their impact on the children,  
20 parents and medical institution as a whole - remains largely unexplored in the  
21 literature. This study aimed to examine the effectiveness of therapeutic play in  
22 reducing anxiety and negative emotional manifestations among children undergoing  
23 cast-removal procedures. The satisfaction ratings of parents and cast technicians in  
24 respect of the cast-removal procedures were also to be examined.  
25  
26  
27  
28  
29  
30  
31  
32  
33  
34  
35  
36  
37

### 38 **Theoretical Framework**

39  
40 Lazarus and Folkman's theory of stress and coping theory was used to guide this  
41 trial.<sup>13</sup> They suggest that stress is a relationship between a person and the environment  
42 that the person finds taxing or exceeding resources. Coping is a constantly changing  
43 cognitive and behavioural effort to manage stressful situations. The two types of  
44 strategy used to cope with stress are problem-focused and emotional-focused coping.  
45  
46 When individuals perceive that they cannot change the threatening situation, they will  
47 resort to emotion-focused coping.<sup>13</sup> It is well known that cast-removal procedures is  
48 stressful for children.<sup>1,2</sup> Children likely feel stress and anxiety if they perceived a lack  
49  
50  
51  
52  
53  
54  
55  
56  
57  
58  
59  
60

1  
2  
3 of control over the medical procedure.<sup>8</sup> Therapeutic play works by helping children to  
4  
5 prepare for the procedure and thereby assist them to regain a sense of self-control to  
6  
7 cope with the stressful procedure.<sup>13, 14</sup> As a result, it is reasoned that children  
8  
9 undergoing therapeutic play intervention will be more likely to cope with cast  
10  
11 removal procedures and feel less stress and anxiety.  
12  
13  
14

## 15 16 **Methods**

### 17 18 **Design**

19  
20 A two-arm parallel randomised controlled trial was employed.  
21  
22  
23

### 24 25 **Setting**

26  
27 The study was conducted in the orthopaedic outpatient department (OPD) of a  
28  
29 regional teaching hospital in Hong Kong, where the OPD cast room performs  
30  
31 approximately 20 CR procedures monthly. The standard regimen in this OPD did not  
32  
33 include therapeutic play intervention.  
34  
35  
36

### 37 38 **Participants**

#### 39 40 *Children*

41  
42 Children and their accompanying parents who were waiting for the cast room  
43  
44 procedure were invited to participate in the study if: (i) the child was 3-12 years of  
45  
46 age; and (ii) the parents were able to speak Cantonese and read Chinese. Children  
47  
48 were excluded if they: (i) had had a cast removed within the previous 3 months; or (ii)  
49  
50 had neurological or developmental problems as shown on the medical record.  
51

52  
53 The rationale for selecting 3-12 year olds was that the number of children having  
54  
55 cast room procedure within this age range in Hong Kong was higher than for other  
56  
57  
58  
59  
60

1  
2  
3 age groups. According to Piaget's (1963) theory of cognitive development, children  
4 from 3-7 belong to the same pre-operational stage, while those between 8-12 belong  
5 to the concrete operational stage.<sup>15</sup> Children in different age group are at the different  
6 stage of psychosocial development and likely respond to cast-removal procedures and  
7 therapeutic play differently.<sup>16</sup> Therefore, children were stratified according to their  
8 age group (3-7 and 8-12).

9  
10  
11  
12  
13  
14  
15  
16 The sample size of the study was determined to detect an effect size of Cohen's  $d$   
17  $=0.6$  on the outcomes of anxiety level and emotional manifestation between the  
18 intervention and control groups with reference to previous therapeutic play studies<sup>17-18</sup>  
19 for guiding the selection of a minimum detectable effect. By using the power analysis  
20 software GPower 3.1, 45 subjects in each group were sufficient to detect an effect of  
21 at least 0.6 with 80% power at 5% level of significance. Taking into account of up to  
22 a 15% attrition rate and stratified the study by age, 53 children each would be  
23 recruited for the intervention and control groups per stratum by age (3-7 & 8-12  
24 years).

### 35 36 37 *Accompany parents and cast technicians*

38  
39 All accompany parents and cast technicians involved in the cast-removal  
40 procedures were invited to assess their satisfaction for the procedures.  
41  
42  
43  
44  
45

### 46 47 **Randomisation**

48  
49 Eligible children undergoing the CR procedure were randomly allocated to the  
50 intervention or control groups in a 1:1 ratio. Randomisation were stratified by the two  
51 age groups, 3-7 and 8-12 years. Serially numbered opaque sealed envelopes  
52 containing the grouping identifier (intervention or control) for each age group were  
53  
54  
55  
56  
57

1  
2  
3 prepared in advance by an independent statistician using computer-generated random  
4  
5 codes. The group allocation of the children recruited was assigned according to their  
6  
7 ages and sequence of enrolment in the study, and the grouping identifier contained in  
8  
9 the corresponding numbered envelopes.  
10

### 11 12 13 **Control Group: Standard Care**

14  
15 Participants in the control group received standard care without therapeutic play  
16  
17 intervention. Standard care included the nurse explaining why and what would be  
18  
19 done and saying comforting and supportive words during the procedures.  
20  
21  
22  
23

### 24 **Intervention Group: Therapeutic Play**

25  
26 In addition to the standard care, children in the intervention group also received  
27  
28 therapeutic play intervention. The interventions were conducted by an experienced  
29  
30 and well-trained senior hospital play specialist (HPS). The HPS has more than five  
31  
32 years of experience in delivering therapeutic play - including preparation play and  
33  
34 distraction play - to children undergoing medical treatments in various units of  
35  
36 hospitals. To ensure therapeutic play interventions were provided according to the  
37  
38 children's needs and psycho-cognitive development,<sup>15-16</sup> the research team met with  
39  
40 the HPS to set up the research protocol (supplementary file). The content of the  
41  
42 therapeutic play had two main components: preparation and distraction forms of  
43  
44 play.<sup>19</sup> The duration of intervention was about 30 minutes.  
45  
46  
47  
48  
49

#### 50 ***Preparation play***

51  
52 Preparation play was conducted before the CR procedure. A demonstration of the  
53  
54 CR procedure was conducted using a doll. The demonstration included:  
55  
56  
57  
58  
59  
60



- 1
- 2
- 3 • Showing a dummy circular-saw cast cutter with appropriate sound effects
- 4
- 5 • Playing with a doll and explaining how the cast was cut open by the circular saw
- 6
- 7 • Reassuring children that the saw would not cut their skin if they followed the
- 8 instruction not to move
- 9
- 10
- 11 • Explaining that, when the cast was cut, the child might feel vibration or tingling,
- 12 notice a certain warmth and see chalky dust flying
- 13
- 14
- 15 • Describing the use of spreaders and scissors to finish removing the cast
- 16
- 17
- 18 • Explaining how, after the cast was open, the skin might appear scaly and dirty and the
- 19 limb feel a little stiff when first moved; also that the arm or leg might seem light
- 20 because the cast had been heavy.
- 21
- 22
- 23

24 During the demonstration, the children were asked to touch and play with the doll  
25 and material, and role-play how they would respond to the procedure after the  
26 demonstration. The preparation play usually took 10–15 minutes to complete.  
27  
28  
29  
30

### 31 *Distraction play*

32 Throughout the CR procedure, support was given to children by introducing  
33 distraction play. The aim of the distraction play was to divert children's attention  
34 away from the medical procedure. Methods of distraction included visual or auditory  
35 distraction, deep breathing exercises, tactile stimulation, counting/singing or other  
36 verbal interaction. The choice of method depended on the children's choices.<sup>20</sup> The  
37 parents' presence and involvement were supported, and the children were praised for  
38 any act of successful self-control. The conclusion of the procedure was indicated by  
39 offering the children a reward (e.g. stickers). The children did not know that they  
40 would receive reward in advance.  
41  
42  
43  
44  
45  
46  
47  
48  
49  
50  
51  
52  
53  
54  
55  
56  
57  
58  
59  
60

## Primary outcome measures

### Anxiety

#### *Visual analogue scale*

A visual analogue scale (VAS) was used to assess the anxiety levels of children between 3 and 7. The VAS consists of a 10-cm horizontal line anchored by the words 'not worried' (low score) at one end and 'very worried' (high score) at the other, with drawings of different facial expressions spaced along the line. Children aged between 3-7 were asked to indicate their levels of anxiety by moving a pointer over the line. As children of 3 or 4 may have limited verbal expression abilities, their parents were also invited to rate the anxiety levels of their children. The VAS is a widely used scale which has been found to be a reliable and valid tool for measuring children's subjective feelings.<sup>21</sup>

#### *The short-form Chinese version of the State Anxiety Scale for Children (CSAS-C)*

The CSAS-C is a 10-item self-report scale measuring the anxiety levels of children aged 8-12 in busy clinical setting.<sup>17</sup> It is a three-point Likert scale with total scores ranging from 10 to 30, with higher scores indicating greater anxiety levels.<sup>17</sup> The psychometric properties of the short form have been tested and found to correlate highly with the scores on the full form ( $r = 0.92$ ), with good internal consistency ( $r = 0.83$ ) and convergent validity that differentiate the state anxiety of children in various situations. Factorial structure of the short form was also checked using exploratory and confirmatory analyses.<sup>22</sup> The Cronbach's alpha of the scale in this study was 0.80 to 0.88.<sup>23-24</sup>

#### *Children's Emotional Manifestation Scale (CEMS)*

1  
2  
3 The emotional behaviour of children during CR procedures was documented by  
4 using the CEMS, developed by Li and Lopez in 2005. It comprises five observable  
5 emotional forms of behaviour, categorised as ‘facial expression’, ‘vocalisation’,  
6 ‘activity’, ‘interaction’ and ‘level of co-operation’. The CEMS score is obtained by  
7 reviewing the descriptions of behaviour in each category and selecting the number  
8 that most closely represents the behaviour observed at the time the subject  
9 experiences the most distress. Each category is scored from one to five. Observable  
10 forms of behaviour in each category of the CEMS are explained in detail with an  
11 operational definition, so that the observer, a research nurse in this study, using the  
12 scale has relatively clear-cut criteria for assessment. The sum of the numbers obtained  
13 for each category is the total score, which will be between 5-25, higher scores  
14 indicating the manifestation of more negative (distressed) emotional behaviour. The  
15 evaluation of the psychometric properties of the CEMS demonstrated adequate  
16 reliability and validity.<sup>25</sup> The Cronbach’s alpha of the scale in this study was 0.86.<sup>23-24</sup>

## 35 **Secondary outcome measures**

### 37 **Satisfaction scale for parent and cast technician**

39 Two questionnaires in English, developed by Tyson and colleagues (2014),<sup>12</sup> were  
40 adopted to measure parents' and cast technicians' satisfaction levels. The original  
41 questionnaire for parents is a 10-item scale to measure their satisfaction with the child  
42 life services. Each item is rated on a five-point scale ranging from 1 = strongly  
43 disagree - 5 = strongly agree, higher scores indicating higher levels of satisfaction.  
44 Example of the statement used is ‘My child’s emotional needs were met’. The  
45 perception of the cast technician was examined by eight items, with each being rated  
46 on a scale from 1 = strongly disagree - 5 = strongly agree. Example of the statement

1  
2  
3 used is 'the child engaged in distraction'. The researcher translated the questionnaire  
4 into Chinese, using the back-translation method recommended by Brislin (1986).<sup>26</sup>  
5  
6 The translated version was reviewed by a panel of expert professionals for semantic  
7 and content equivalence. The scale level of semantic equivalence for the parents'  
8 satisfaction and cast technician satisfaction was 95% and 92%, respectively,  
9  
10 indicating that the translated version was a correct reflection of the original version.<sup>27</sup>  
11  
12 The content validity index of the parent's satisfaction level scale was 0.90 and cast  
13 technician's satisfaction level scale was 0.94, indicating the content of the translated  
14 scale were equivalent to the original version. The Cronbach's alpha of both scales in  
15 this study was 0.90.  
16  
17  
18  
19  
20  
21  
22  
23  
24  
25

### 26 **Heart rate monitoring**

27  
28 A standard automatic heart rate monitoring machine, available in the study  
29 hospital, was used to measure children's heart rates to assess their physiological  
30 responses to CR procedures. Children's heart rates have been considered objective  
31 and definitive indicators for an indirect assessment of children's anxiety levels in  
32 previous studies.<sup>28</sup>  
33  
34  
35  
36  
37  
38

39 Anxiety produced due to CR procedures likely manifested as an increase in heart rate  
40 in children.  
41  
42  
43  
44  
45

### 46 **A demographic sheet**

47  
48 The socio-demographic and clinical variables of parents and children were  
49 collected. The items for children include age, sex, reason for cast application and  
50 number of hospital admissions. The accompany parent's age, sex, educational level  
51 and working status was also obtained. The cast technician's demographic information,  
52  
53  
54  
55  
56  
57  
58  
59  
60

1  
2  
3 including age, sex and years of work experience, was also collected by the research  
4  
5 nurse.

### 9 **Data collection**

10  
11 Children having their cast-removal would be arranged to wait outside the cast  
12 room of the study OPD in a separate timeslot. They would be identified by a research  
13 nurse in the waiting area. Permission for a child meeting the recruitment criteria to  
14 participate was obtained from the accompanying parent. The research nurse  
15 conducted the interview with consenting parent-child pairs in a private room. The  
16 children in both groups were asked to indicate how anxious they were by completing  
17 either the VAS anxiety scale (for children between 3–7 years old) or the short form of  
18 the CSAS-C (for children aged between 8–12).<sup>17</sup> The research nurse obtained  
19 demographic and clinical data from the parents. She also asked the parents of children  
20 aged under 5 to use the VAS scale to indicate their child's perceived anxiety level.  
21 Children's heart rates were also monitored for one minute at the end of the interview,  
22 using a standard automatic monitor.

23  
24 According to the subject allocation scheme, children in the control group received  
25 standard care in CR room A, while the intervention group additionally received a  
26 therapeutic play intervention conducted by the HPS in CR room B. The parents and  
27 children were asked during the informed consent process not to discuss the purpose of  
28 the study with cast technicians in the cast room.

29  
30 In the CR room, the research nurse took two one-minute recordings of the child's  
31 heart rate: (1) when the cast technician started sawing the cast; and (2) immediately  
32 after the cast had been removed. The research nurse then rated the child's signs of  
33 distress from the time the saw touched the cast until the limb was free of it, by means

1  
2  
3 of the CEMS.<sup>25</sup> She also recorded the length of the whole CR procedure for each  
4 child. After the CR procedure, the research nurse asked the parents and the cast  
5 technician to fill in their respective satisfaction scales to reflect their perceptions of  
6 how the CR procedure had been delivered. The children were asked to recall their  
7 level of anxiety throughout the procedure by filling in either the VAS anxiety scale  
8 (for those between 3-7) or the short form of the CSAS-C (for those between 8-12).<sup>17</sup>  
9  
10  
11  
12  
13  
14  
15  
16 Parents were asked to rate the VAS scale for children under 5.  
17  
18  
19

### 20 **Data analysis**

21  
22 All data were analysed by means of IBM SPSS for Windows, Version 22.  
23  
24 Appropriate descriptive statistics were used to present the participants' socio-  
25 demographics and outcome measurements. A generalised estimating equations (GEE)  
26 model was used to compare each of the outcome measures across time between the  
27 two groups. Specifically, the GEE model was used to estimate the mean change on  
28 each outcome between group with adjustment for the baseline group difference and  
29 accounting for autocorrelation of the outcome across time. All statistical analyses  
30 were two-sided, with the level of significance set at 0.05.  
31  
32  
33  
34  
35  
36  
37  
38  
39  
40  
41

### 42 **Patient and Public involvement**

43  
44 Development of research question and outcome measures were based on the facts  
45 that many children reported anxiety during the cast removal procedures. Patients were  
46 not involved in the design, subject recruitment, and the conduction of the study. The  
47 findings will be disseminated to the study participants by publishing the study as an  
48 original article. A satisfaction survey was conducted involving the parents of the  
49  
50  
51  
52  
53  
54  
55  
56  
57  
58  
59  
60

1  
2  
3 participants to assess whether the participants experienced any burden during the  
4  
5 intervention.

## 6 7 8 9 **Results**

### 10 11 **Demographic and clinical characteristics of the children and their families**

12  
13 From August 2015 - January 2017, a total of 209 patients and their accompanying  
14  
15 parents were screened and approached. However, one of them declined to participate  
16  
17 in the study because they were in a hurry and had to leave the clinic at once after the  
18  
19 procedure. Therefore, a total of 208 participants and their accompany parents were  
20  
21 recruited. Of these, 105 were allocated to the control group and 103 to the  
22  
23 intervention group (Figure 1). Their mean ages were 7.7 (SD 3.0) and 7.5 (SD 2.9),  
24  
25 respectively. The demographic and clinical characteristics of the two groups were  
26  
27 comparable and are shown in Table 1.  
28  
29  
30  
31  
32

### 33 **Anxiety levels**

#### 34 35 *Children aged between 3 and 7*

36  
37 The mean anxiety scores of children aged 3-7 in the intervention group as  
38  
39 measured by VAS anxiety scale decreased from 35.4 to 27.6 after the CR procedures.  
40  
41 By contrast, the mean anxiety levels of children who did not take part in therapeutic  
42  
43 play increased from 34.0 to 46.3. The difference in mean changes between the two  
44  
45 groups as estimated by the group by time interaction term by using GEE was -20.1  
46  
47 (95% CI: -35.3 to -4.9; p=0.010) (Table 2).  
48  
49

50  
51 Accompanying parent(s) with children under 5 were invited to rate the anxiety  
52  
53 levels of their children using VAS. The results showed that there were moderate to  
54  
55 high correlations between the children and their parent's rating before ( $r = 0.36$ , 95%  
56  
57

1  
2  
3 CI: 0.0 to 0.65;  $p < 0.05$ ) and after the CR procedure ( $r = 0.50$ , 95% CI: 0.13 to 0.74;  
4  
5  $p < 0.01$ ).

### 9 ***Children aged between 8 and 12***

11 The mean anxiety scores of children in the intervention group as measured by  
12 CSAS-C fell from 18.0 to 15.3, and in the control group from 17.4 to 15.9. The  
13  
14 difference in mean changes between the two groups as estimated by using GEE was -  
15  
16 1.1 (95% CI: -2.8 to 0.5;  $p = 0.171$ ). (Table 3).  
17  
18  
19  
20  
21

### 22 **Emotional manifestation during cast-removal procedures**

24 The mean emotional manifestation scores of children aged 3 - 7 and 8 - 12 in the  
25  
26 intervention group were significantly lower than the control group (Table 2 and Table  
27  
28 3). Overall, the mean emotional manifestation scores of the intervention group were  
29  
30 7.6 (SD 2.4) and of the control group 9.8 (SD 3.9) with a mean difference of -2.2  
31  
32 (95% CI: -3.1 to -1.4;  $p < 0.001$ ), indicating that children in the intervention group, on  
33  
34 average, exhibited fewer negative emotional manifestations during the CR procedures  
35  
36 comparing with those children in the control group (Table 4).  
37  
38  
39  
40  
41

### 42 **Changes in heart rate**

44 No significant difference in heart rate was noted between the intervention and  
45  
46 control group among children aged 3 and 7 years old (Table 2). In contrast, significant  
47  
48 difference was found before and during CR procedure between the intervention and  
49  
50 control group among children aged 8 and 12 years old (Table 3). Among all children,  
51  
52 a trend of increasing heart rate was noted before and during the CR procedures for  
53  
54 both groups. The mean heart rate of the intervention and control groups increased by  
55  
56  
57  
58  
59  
60



1  
2  
3 2.6 and 8.4 beats/minute, respectively with a difference in mean changes between the  
4  
5 two groups as estimated by using GEE was -5.9 (95% CI: -10.3 to -1.5;  $p=0.008$ ),  
6  
7 indicating that the children in the intervention group might experience lower levels of  
8  
9 anxiety than those in the control group (Table 4).  
10  
11  
12

### 13 **Satisfaction levels of parents and cast technicians**

14  
15 Among all children, the satisfaction scores of parents in the intervention group  
16  
17 (46.6, SD 5.1) were higher than the control group (42.6, SD 6.9) with a mean  
18  
19 difference of 4.0 (95% CI: 5.6 to 2.3;  $p<0.001$ ). Similarly, the satisfaction scores of  
20  
21 CR technician in the intervention group (34.3, SD 3.6) were higher than those in the  
22  
23 control group (31.7, SD 4.3) with a mean difference of 2.6 (95% CI: 3.7 to 1.6;  
24  
25  $p<0.001$ ). (Table 4).  
26  
27  
28  
29  
30

### 31 **Duration of procedure**

32  
33 Among all children, the mean time (in minutes) taken to perform the CR  
34  
35 procedure was shorter in the intervention 4.1 (SD 2.3) than in the control groups 4.6  
36  
37 (SD 2.2) with a mean difference of -0.56 (95% CI: -1.17 to 0.05;  $p=0.072$ ). (Table 2).  
38  
39  
40  
41

## 42 **Discussion**

43  
44 This study expanded previous studies and examined the effects of a therapeutic  
45  
46 play intervention on CR procedures in patients, parents and institutions. A randomised  
47  
48 controlled design was employed such that the cause and effect relationships among  
49  
50 variables could be established.<sup>27</sup> Findings suggest that therapeutic play effectively  
51  
52 assists children aged 3-7 to cope with stressful CR procedures and reduces their  
53  
54  
55  
56  
57  
58  
59  
60

1  
2  
3 anxiety levels. Overall, children who received the intervention exhibited significantly  
4  
5 fewer negative emotional manifestations than those who did not.  
6

7 Most children in this study presented some degree of anxiety before the  
8  
9 procedures, the use of a saw and the fluctuating level of high-frequency noise  
10  
11 probably accounting for most of the anxiety.<sup>1 29</sup> Previous studies employed ear  
12  
13 protection <sup>5</sup> or lullaby-type music <sup>6</sup> to reduce anxiety in children during CR, while  
14  
15 heart rate and mean arterial blood pressure were used as physiological outcome  
16  
17 indicators of anxiety, respectively. However, no significant difference was noted in  
18  
19 these parameters in either study.  
20  
21

22 The positive results of the present study are further supported by the fact that the  
23  
24 mean increase in heart rates before and during the procedure was lower in the  
25  
26 intervention than in the control group. A possible explanation may be that the  
27  
28 therapeutic play assisted children to cope with an unfamiliar procedure. During the  
29  
30 play session, the HPS explained and simulated the CR procedures, which allowed the  
31  
32 children to understand them. As the children were familiarised with the procedure,  
33  
34 they would expect it to generate noise but not pain. These preparations assisted the  
35  
36 children in such a way that they had an enhanced sense of control over the procedure,  
37  
38 minimising the adverse effects of the experience.<sup>6</sup> As suitable and age-appropriate  
39  
40 distraction were provided to the intervention group, the children's attention was  
41  
42 diverted from the anxiety-provoking procedure to playful interaction. They therefore  
43  
44 exhibited less negative emotional behaviour. However, children without any  
45  
46 distraction might have focused on the whole procedure and thus exhibited more  
47  
48 negative emotions and increased anxiety levels, even after it was all over.  
49  
50  
51

52 Nevertheless, although children of 8-12 in the intervention group had larger  
53  
54 reductions in their anxiety scores than those in the control group after the procedure,  
55  
56  
57  
58  
59  
60

1  
2  
3 the difference between the groups was non-significant. The results were in conflict  
4  
5 with those of a previous study suggesting that older hospitalised children benefit more  
6  
7 from the play intervention.<sup>21 30</sup> One possible explanation for the non-significant  
8  
9 findings is that older children have a better understanding of CR procedures than  
10  
11 younger children. According to Piaget (1963),<sup>15</sup> children of 8–12 can mentally  
12  
13 manipulate information to solve problems. As they may have obtained information  
14  
15 about the CR procedure from other sources, such as books, the internet or friends,  
16  
17 they might feel less anxious about the forthcoming procedure. Moreover, compared  
18  
19 with younger children, older children probably have better coping strategies and better  
20  
21 control of their emotions, even in stressful situations. Nevertheless, further study is  
22  
23 needed to determine other effective methods for children at this developmental stage.  
24  
25

26  
27 Consistent with a previous study,<sup>31</sup> the result indicated that parents of children in  
28  
29 the intervention group were more satisfied with the care and play intervention than  
30  
31 those of children receiving standard care only. The satisfaction of parents in the  
32  
33 intervention group is likely to have increased because they also experienced the  
34  
35 positive influence of play on their children, particularly the reduction in anxiety and  
36  
37 improved cooperation with the procedure.<sup>32</sup> In fact, parental perception played an  
38  
39 important role on child's coping with various conditions such as cancer or other  
40  
41 medical procedures.<sup>33</sup> The positive correlations in the VAS ratings of children under 5  
42  
43 further suggested that parents also perceived their children to be less anxious after the  
44  
45 intervention. However, further study could also include self-report questionnaire not  
46  
47 only on satisfaction but also examine the mediating role of parents play in the  
48  
49 distraction intervention.  
50  
51

52  
53 Some cast technicians might have concerns that the CR procedures would be  
54  
55 impeded and prolonged because the play intervention was implemented at the same  
56  
57

1  
2  
3 time. However, the findings suggest that the duration of the entire procedure was  
4 shorter in the intervention than in the control group, although the differences were  
5 non-significant. Nevertheless, the duration in the intervention group did decrease,  
6 probably because the children were psychologically prepared and were thus more  
7 cooperative. In fact, children who are less anxious are easier to manage in clinical  
8 situations,<sup>34</sup> which may account for the increased satisfaction of CR technicians in  
9 procedures assisted by HPS.  
10  
11  
12  
13  
14  
15  
16  
17  
18  
19

### 20 **Limitations**

21  
22 The results of the current study should be interpreted in the light of several  
23 limitations. First, children were recruited from a single clinical setting. The  
24 generalisability of the findings may therefore be restricted. Second, neither patients  
25 nor outcome assessors were blinded to the study. However, because of the very nature  
26 of the intervention, blinding of patients and outcome assessors would have been  
27 difficult. Although children are unlikely to change their behaviour even when they  
28 know they are participating in a certain intervention,<sup>9</sup> however, lack of blinding may  
29 contribute to an importance source of bias because the assessors know the group  
30 allocation of children which likely affect their ratings of children's emotional  
31 manifestation during the CR procedures. Nevertheless, different strategies were  
32 employed to minimise the potential bias. For example, children were assigned to  
33 different cast rooms and isolated from other patients at the time of the intervention,  
34 regardless of whether or not they were randomised to the play intervention group.  
35 Also, subjective and objective outcome measures were used to evaluate the impact of  
36 therapeutic play on the psychological state of a child. Finally, there might be other  
37 factors that affect children's anxiety level and play predisposition such as children'  
38  
39  
40  
41  
42  
43  
44  
45  
46  
47  
48  
49  
50  
51  
52  
53  
54  
55  
56  
57  
58  
59  
60

1  
2  
3 coping styles or temperament, or parent's anxiety level and symptomatology towards  
4  
5 cast-removal procedure. Future study should take these factors into account and  
6  
7 consider to include the assessment of children's coping style or parents' anxiety level  
8  
9 as well.  
10

### 11 12 13 **Conclusions**

14  
15 This study confirms the findings of previous work that children experience some  
16  
17 degree of anxiety and exhibit negative emotional manifestations during medical  
18  
19 procedures. The consequences of stress appear to be substantial, and thus the  
20  
21 importance of assisting children to cope effectively with it and reduce its impact is  
22  
23 highlighted. A gap in the literature is addressed by providing empirical evidence on  
24  
25 the benefits of therapeutic play for children, family and medical institution during CR  
26  
27 procedures. The findings show that a play intervention effectively reduces anxiety  
28  
29 levels and negative emotional manifestations among children undergoing CR  
30  
31 procedures. Such positive outcomes also translate into an improvement in the  
32  
33 satisfaction levels of parents and CR technicians with the procedures. Play is  
34  
35 universal and similar intervention can be adopted in other settings or medical  
36  
37 procedures. It may also adopt to reduce anxiety and improve motor abilities of  
38  
39 children that underwent invasive procedures.<sup>35</sup> The findings highlight the importance  
40  
41 of providing and integrating therapeutic play into standard care. Such an intervention  
42  
43 ensures that holistic and quality care is provided to ease the psychological burden of  
44  
45 the patients. Furthermore, it contributes to improve patient care, satisfaction and  
46  
47 overall experience of children and their families.  
48  
49  
50  
51  
52  
53  
54

### 55 **Acknowledgements**

1  
2  
3 We would like to express our sincere gratitude for the generous support of  
4 Kuenflower Management Inc. (in honour of Kwong Sik Kwan and Kwong Hui May  
5 Kuen) given to the UBS Optimus Foundation in sponsorship for this project.  
6  
7  
8  
9  
10  
11  
12

### 13 **References**

- 14  
15 1. Katz K, Fogelman R, Attias J, *et al.* Anxiety reaction in children during removal of  
16 their plaster cast with a saw. *J Bone Joint Surg* 2001;**83**:388-90.  
17  
18
- 19 2. Mahan ST, Harris MS, Lierhaus AM, *et al.* Noise reduction to reduce patient  
20 anxiety during cast removal: can we decrease patient anxiety with cast removal  
21 by wearing noise reduction headphones during cast saw use? *Orthop Nurs*  
22 2017;**36**:271-78.  
23  
24
- 25 3. Sanders MB, Starr AJ, Frawley WH, *et al.* Posttraumatic stress symptoms in  
26 children recovering from minor orthopaedic injury and treatment. *J Orthop*  
27 *Trauma* 2005;**19**:623-8.  
28  
29
- 30 4. He HG, Zhu LX, Chan WC, *et al.* A mixed-method study of effects of a therapeutic  
31 play intervention for children on parental anxiety and parents' perceptions of the  
32 intervention. *J Adv Nurs* 2015;**71**:1539-51.  
33  
34
- 35 5. Carmichael KD, Westmoreland J. Effectiveness of ear protection in reducing  
36 anxiety during cast removal in children. *Am J Orthop* 2005;**34**:43-6.  
37  
38
- 39 6. Liu RW, Mehta P, Fortuna S, *et al.* A randomized prospective study of music  
40 therapy for reducing anxiety during cast room procedures. *J Pediatr Orthop*  
41 2007;**27**:831-33.  
42  
43
- 44 7. Vessey JA, Mahon MM. Therapeutic play and the hospitalized child. *J Pediatr*  
45 *Nurs* 1990;**5**:328-33.  
46  
47  
48  
49  
50  
51  
52  
53  
54  
55  
56  
57  
58  
59  
60

- 1  
2  
3 8. Li WH, Chung JO, Ho KY, *et al.* Play interventions to reduce anxiety and negative  
4  
5 emotions in hospitalized children. *BMC Pediatr* 2016;**11**:16-36.  
6
- 7 9. Silva RD, Austregésilo SC, Ithamar L, *et al.* Therapeutic play to prepare children  
8  
9 for invasive procedures: a systematic review. *J Pediatr (Rio J)* 2017;**93**:6-16.  
10
- 11 10. Brewer S, Gleditsch SL, Syblik D, *et al.* Pediatric anxiety: child life intervention  
12  
13 in day surgery. *J Pediatr Nurs* 2006;**21**:13–22.  
14
- 15 11. Stevenson MD, Bivins CM, O'Brien K, *et al.* Child life intervention during  
16  
17 angiocatheter insertion in the pediatric emergency department. *Pediatr Emerg*  
18  
19 *Care* 2005;**21**:712–18.  
20
- 21 12. Tyson ME, Bohl DD, Blickman JG. *A randomized controlled trial: Child life*  
22  
23 *services in paediatric imaging*. Springer-Verlag, 2014.  
24
- 25 13. Lazarus RS, Folkman S. *Stress, Appraisal and Coping*. New York: Springer, 1984.  
26
- 27 14. Li HC, Chung OK, Ho KY, *et al.* Coping strategies used by children hospitalized  
28  
29 with cancer: an exploratory study. *Psychooncology* 2011;**20**:969-76.  
30
- 31 15. Piaget J. *The origins of intelligence in children*. New York: Norton, 1963.  
32
- 33 16. Erikson E. *Childhood and society*. 2nd edn. New York: Norton & Company, 1963.  
34
- 35 17. Li HCW, Lopez V. Development and validation of a short form of the Chinese  
36  
37 version of the State Anxiety Scale for Children. *Int J Nurs Stud* 2007;**44**:566–73.  
38
- 39 18. He HG, Zhu L, Chan SW, *et al.* Therapeutic play intervention on children's  
40  
41 perioperative anxiety, negative emotional manifestation and postoperative pain: a  
42  
43 randomized controlled trial. *J Adv Nurs* 2015;**71**:1032-43.  
44
- 45 19. Hasenfuss E, Franceschi A. Collaboration of nursing and child life: a palette of  
46  
47 professional practice. *J Pediatr Nurs* 2003;**18**:359-65.  
48  
49  
50  
51  
52  
53  
54  
55  
56  
57  
58  
59  
60

- 1  
2  
3 20. Doellman D. Pharmacological versus nonpharmacological techniques in reducing  
4  
5 venipuncture psychological trauma in paediatric patients. *J Infus Nurs* 2003;  
6  
7 26:103–9.  
8
- 9 21. Bringuier S, Dadure C, Raux O, *et al.* The perioperative validity of the visual  
10  
11 analogue anxiety scale in children: a discriminant and useful instrument in  
12  
13 routine clinical practice to optimize post-operative pain management. *Anesth*  
14  
15 *Analg* 2009;**109**:737–44.  
16
- 17 22. Li HC, Wong ML, Lopez V. Factorial structure of the Chinese version of the State  
18  
19 Anxiety Scale for Children (short form). *J Clin Nurs* 2008;**17**:1762-70.  
20  
21
- 22 23. Wong CL, Ip WY, Chan CWH, *et al.* *The stress-reducing effects of therapeutic*  
23  
24 *play on children undergoing cast removal procedure.* Poster session presented at  
25  
26 the Hospital Authority Convention, Hong Kong, 2017.  
27  
28
- 29 24. Wong CL. *The best partner in a stressful medical procedure: Play.* Paper  
30  
31 presented at the Imagining the Future: Community Innovation and Social  
32  
33 Resilience in Asia, The Chinese University of Hong Kong, Hong Kong, 2017.  
34  
35
- 36 25. Li HCW, Lopez V. Children's Emotional Manifestation Scale: development  
37  
38 testing. *J Clin Nurs* 2005;**14**:223–29.  
39  
40
- 41 26. Brislin RW. The wording and translation of research instrument. In WJ Lonner,  
42  
43 JW Berry eds. *Field methods in cross-cultural research.* pp. 137-164. Beverly  
44  
45 Hills, CA.: Stage, 1986.  
46  
47
- 48 27. Polit DF, Beck CT. *Essentials of nursing research: Appraising evidence for*  
49  
50 *nursing practice.* 8th edn. Philadelphia: Lippincott Williams & Wilkins, 2013.  
51  
52
- 53 28. Panda N, Bajaj A, Pershad D, *et al.* Pre-operative anxiety: effect of early or late  
54  
55 position on the operating list. *Anaesthesia* 1996;**51**:344–46.  
56  
57



- 1  
2  
3 29. Chan CWH, Choi KC, Chien WT, *et al.* Health-related quality-of-life and  
4  
5 psychological distress of young adult survivors of childhood cancer in Hong  
6  
7 Kong. *Psychooncology* 2014;**23**:229-36.  
8  
9  
10 30. Ziegler DB, Prior MM. Preparation for surgery and adjustment to hospitalization.  
11  
12 *Nurs Clin North Am* 1994;**29**:655-69.  
13  
14 31. Schlechter JA, Avik AL, DeMello S. Is there a role for a child life specialist  
15  
16 during orthopedic cast room procedures? A prospective-randomized assessment.  
17  
18 *J Pediatr Orthop B* 2017;**26**:575-79.  
19  
20 32. Li HC, Lopez V, Lee TL. Effects of pre-operative therapeutic play on outcomes of  
21  
22 school-age children undergoing day surgery. *Res Nurs Health* 2007;**30**:320-32.  
23  
24 33. Tremolada M, Bonichini S, Basso G, *et al.* Coping with pain in children with  
25  
26 leukemia. *Int J Cancer Res Pre* 2015;**8**:451-66.  
27  
28 34. Schreiber KM, Cunningham SJ, Kunkov S, *et al.* The association of preprocedural  
29  
30 anxiety and the success of procedural sedation in children. *Am J Emerg Med*  
31  
32 2006;**8**:117-28.  
33  
34 35. Taverna L, Tremolada M, Bonichini S, *et al.* Motor skill delays in pre-school  
35  
36 children with leukemia one year after treatment: Hematopoietic stem cell  
37  
38 transplantation therapy as an important risk factor. *PLoS ONE* 2017;**12**:  
39  
40 e0186787.  
41  
42  
43  
44  
45  
46  
47  
48  
49  
50  
51  
52  
53  
54  
55  
56  
57  
58  
59  
60

## Figure Legends

Figure 1: The CONSORT diagram of this study

## Footnotes

**Contributors:** Wan Yim and King Wah conceived and designed the study. Cho Lee and Wing Han obtained ethical approval. Ming Chau supervised data collection. Cho Lee supervised the data analysis and wrote the paper. Kai Chow provided statistical support and analysed the data. Ming Chau and Wing Han helped revising the manuscript. All authors have given final approval of the version to be published.

**Funding:** This study was supported by the Playright Children's Play Association.

**Disclaimer:** The funding agencies are not responsible for the opinions presented in the manuscript. The funding bodies had no influence on the conduct of the study or the interpretation of the results.

**Competing interests:** No conflict of interest has been declare by all the authors.

**Patient consent:** Obtained.

**Ethics approval:** This study was approved by the Joint Chinese University of Hong Kong – New Territories East Cluster Clinical Research Ethics Committee (2015.005-T).

**Provenance and peer review:** Not commissioned; externally peer reviewed.

**Data sharing statement:** Not additional data are available.

Table 1: Socio-demographics and clinical characteristics of the participants (n=208) and cast-removal technicians (n=12)

| <i>Characteristics</i>                                        | Control (n=105) | Intervention (n=103) |
|---------------------------------------------------------------|-----------------|----------------------|
| <b><u>Children and their family</u></b>                       |                 |                      |
| <i>Age of the child (years) †</i>                             | 7.7 (3.0)       | 7.5 (2.9)            |
| <i>Age group</i>                                              |                 |                      |
| 3 – 7 years                                                   | 55 (52.4%)      | 52 (50.5%)           |
| 8 – 12 years                                                  | 50 (47.6%)      | 51 (49.5%)           |
| <i>Sex of the child</i>                                       |                 |                      |
| Female                                                        | 37 (35.2%)      | 36 (35.0%)           |
| Male                                                          | 68 (64.8%)      | 67 (65.0%)           |
| <i>Accompanied by</i>                                         |                 |                      |
| Mother only                                                   | 52 (49.5%)      | 54 (52.4%)           |
| Father only                                                   | 29 (27.6%)      | 26 (25.2%)           |
| Both parents                                                  | 14 (13.3%)      | 10 (9.7%)            |
| Mother/father together with other relatives                   | 6 (5.7%)        | 6 (5.8%)             |
| Other relatives                                               | 4 (3.8%)        | 7 (6.8%)             |
| <i>Highest education attainment of the accompanied family</i> |                 |                      |
| Primary or below                                              | 8 (7.6%)        | 7 (6.8%)             |
| Secondary                                                     | 63 (60.0%)      | 64 (62.1%)           |
| College or above                                              | 34 (32.4%)      | 32 (31.1%)           |
| <i>Number of hospital admission</i>                           |                 |                      |
| 0                                                             | 38 (36.2%)      | 31 (30.1%)           |
| 1                                                             | 30 (28.6%)      | 36 (35.0%)           |
| 2                                                             | 25 (23.8%)      | 14 (13.6%)           |
| ≥ 3                                                           | 12 (11.4%)      | 22 (21.4%)           |
| <i>Type of casts</i>                                          |                 |                      |
| Arm long                                                      | 88 (83.8%)      | 82 (79.6%)           |
| Arm short                                                     | 6 (5.7%)        | 7 (6.8%)             |
| Leg long                                                      | 9 (8.6%)        | 13 (12.6%)           |

|                             |            |            |
|-----------------------------|------------|------------|
| Leg short                   | 2 (1.9%)   | 1 (1.0%)   |
| <b>CR technician (n=12)</b> |            |            |
| <i>Sex</i>                  |            |            |
| Female                      | 32 (30.5%) | 30 (29.1%) |
| Male                        | 73 (69.5%) | 73 (70.9%) |
| <i>Age (years)</i>          |            |            |
| < 30                        | 16 (15.2%) | 9 (8.7%)   |
| 30 – 40                     | 34 (32.4%) | 39 (37.9%) |
| > 40                        | 55 (52.4%) | 55 (53.4%) |
| <i>Years of experience</i>  |            |            |
| < 2                         | 14 (13.3%) | 9 (8.7%)   |
| 2 – 5                       | 47 (44.8%) | 41 (39.8%) |
| > 5                         | 44 (41.9%) | 53 (51.5%) |

Data of variables marked with † are presented as mean (standard deviation), otherwise as frequency (%).

Table 2: Outcome measures across time between the intervention and control groups among those children aged between 3 and 7 years (N=107)

|                                                                 | Control<br>(n=55) | Intervention<br>(n=52) | p-value             | Effect size (95% CI) #           |
|-----------------------------------------------------------------|-------------------|------------------------|---------------------|----------------------------------|
| <b>VAS anxiety scale (range: 0 – 100)</b>                       |                   |                        |                     |                                  |
| T1 (before CR procedure)                                        | 34.0 (30.0)       | 35.4 (32.7)            |                     |                                  |
| T3 (after CR procedure)                                         | 46.3 (37.3)       | 27.6 (28.6)            | 0.010 <sup>a</sup>  | 0.50 (0.11 , 0.88) <sup>c</sup>  |
| <b>Children's emotional manifestation scale (range: 5 – 25)</b> |                   |                        |                     |                                  |
| T2 (during CR procedure) †                                      | 10.6 (4.7)        | 8.1 (2.9)              | 0.002 <sup>b</sup>  | 0.62 (0.23 , 1.01)               |
| <b>Heart rate (per minute)</b>                                  |                   |                        |                     |                                  |
| T1 (before CR procedure)                                        | 88.7 (14.9)       | 88.6 (14.5)            |                     |                                  |
| T2 (during CR procedure)                                        | 95.8 (17.7)       | 89.8 (16.6)            | 0.081 <sup>a</sup>  | 0.33 (-0.05 , 0.71) <sup>c</sup> |
| T3 (after CR procedure)                                         | 97.2 (15.6)       | 90.0 (17.2)            | 0.051 <sup>a</sup>  | 0.37 (-0.01 , 0.75) <sup>c</sup> |
| <b>Parent satisfaction score (range: 10 – 50)</b>               |                   |                        |                     |                                  |
| T3 (after CR procedure)                                         | 42.5 (6.7)        | 47.3 (3.3)             | <0.001 <sup>b</sup> | 0.89 (0.49 , 1.28)               |
| <b>CR technician satisfaction score (range: 8 – 40)</b>         |                   |                        |                     |                                  |
| T3 (after CR procedure)                                         | 31.5 (5.0)        | 33.9 (3.7)             | 0.007 <sup>b</sup>  | 0.54 (0.15 , 0.92)               |
| <b>Duration of procedure (mins)</b>                             |                   |                        |                     |                                  |
|                                                                 | 4.8 (2.2)         | 4.2 (2.0)              | 0.126 <sup>b</sup>  | 0.30 (-0.08 , 0.68)              |

Data of variables marked with † are presented as median (inter-quartile range), otherwise as mean (standard deviation)

† Nature log-transformed before subjected to independent t-test

# Cohen's d effect size

<sup>a</sup> P-value testing for differential change of heart rate at the underlying time point with respect to T1 by using GEE model

<sup>b</sup> Independent t-test

<sup>c</sup>The Cohen's d effect size corresponds to the standardized mean difference of the mean changes at the underlying time point with respect to T1 between the intervention and control groups

Table 3: Outcome measures across time between the intervention and control groups among those children aged between 8 and 12 years (N=101)

|                                                                   | Control<br>(n=50) | Intervention<br>(n=51) | p-value             | Effect size (95% CI) #           |
|-------------------------------------------------------------------|-------------------|------------------------|---------------------|----------------------------------|
| <b>State Anxiety Scale for Children (CSAS-C) (range: 10 – 30)</b> |                   |                        |                     |                                  |
| T1 (before CR procedure)                                          | 17.4 (4.0)        | 18.0 (3.5)             |                     |                                  |
| T3 (after CR procedure)                                           | 15.9 (4.7)        | 15.3 (3.9)             | 0.171 <sup>a</sup>  | 0.27 (-0.12 , 0.66) <sup>c</sup> |
| <b>Children's emotional manifestation scale (range: 5 – 25)</b>   |                   |                        |                     |                                  |
| T2 (during CR procedure) <sup>†</sup>                             | 9.0 (2.6)         | 7.0 (1.4)              | <0.001 <sup>b</sup> | 0.93 (0.51 , 1.33)               |
| <b>Heart rate (per minute)</b>                                    |                   |                        |                     |                                  |
| T1 (before CR procedure)                                          | 86.3 (13.4)       | 84.8 (12.6)            |                     |                                  |
| T2 (during CR procedure)                                          | 96.2 (14.4)       | 88.7 (14.5)            | 0.037 <sup>a</sup>  | 0.41 (0.01 , 0.80) <sup>c</sup>  |
| T3 (after CR procedure)                                           | 89.9 (13.1)       | 87.5 (13.8)            | 0.720 <sup>a</sup>  | 0.07 (-0.32 , 0.46) <sup>c</sup> |
| <b>Parent satisfaction score (range: 10 – 50)</b>                 |                   |                        |                     |                                  |
| T3 (after CR procedure)                                           | 42.8 (7.1)        | 46.0 (6.5)             | 0.020 <sup>b</sup>  | 0.47 (0.07 , 0.86)               |
| <b>CR technician satisfaction score (range: 8 – 40)</b>           |                   |                        |                     |                                  |
| T3 (after CR procedure)                                           | 31.8 (3.5)        | 34.8 (3.5)             | <0.001 <sup>b</sup> | 0.83 (0.42 , 1.24)               |
| <b>Duration of procedure (mins)</b>                               |                   |                        |                     |                                  |
|                                                                   | 4.4 (2.2)         | 3.9 (2.5)              | 0.314 <sup>b</sup>  | 0.20 (-0.19 , 0.59)              |

Data of variables marked with <sup>†</sup> are presented as median (inter-quartile range), otherwise as mean (standard deviation)

<sup>†</sup> Nature log-transformed before subjected to independent t-test

# Cohen's d effect size

<sup>a</sup> P-value testing for differential change at the underlying time point with respect to T1 by using GEE model

<sup>b</sup> Independent t-test

<sup>c</sup> The Cohen's d effect size corresponds to the standardized mean difference of the mean changes at the underlying time point with respect to T1 between the intervention and control groups

Table 4: Outcome measures across time between the intervention and control groups

|                                                                 | Control        | Intervention   | p-value             | Effect size (95% CI) #           |
|-----------------------------------------------------------------|----------------|----------------|---------------------|----------------------------------|
| <b>Among all children (N=208)</b>                               |                |                |                     |                                  |
| <b>Children's emotional manifestation scale (range: 5 – 25)</b> |                |                |                     |                                  |
|                                                                 | <b>(n=105)</b> | <b>(n=103)</b> |                     |                                  |
| T2 (during CR procedure) †                                      | 9.8 (3.9)      | 7.6 (2.4)      | <0.001 <sup>b</sup> | 0.69 (0.41 , 0.69)               |
| <b>Heart rate (per minute)</b>                                  |                |                |                     |                                  |
| T1 (before CR procedure)                                        | 87.6 (14.2)    | 86.7 (13.6)    |                     |                                  |
| T2 (during CR procedure)                                        | 96.0 (16.2)    | 89.3 (15.5)    | 0.008 <sup>a</sup>  | 0.36 (0.09 , 0.64) <sup>c</sup>  |
| T3 (after CR procedure)                                         | 93.7 (14.9)    | 88.8 (15.6)    | 0.070 <sup>a</sup>  | 0.25 (-0.02 , 0.52) <sup>c</sup> |
| <b>Parent satisfaction score (range: 10 – 50)</b>               |                |                |                     |                                  |
| T3 (after CR procedure)                                         | 42.6 (6.9)     | 46.6 (5.1)     | <0.001 <sup>b</sup> | 0.65 (0.38 , 0.93)               |
| <b>CR technician satisfaction score (range: 8 – 40)</b>         |                |                |                     |                                  |
| T3 (after CR procedure)                                         | 31.7 (4.3)     | 34.3 (3.6)     | <0.001 <sup>b</sup> | 0.66 (0.38 , 0.94)               |
| <b>Duration of procedure (mins)</b>                             |                |                |                     |                                  |
|                                                                 | 4.6 (2.2)      | 4.1 (2.3)      | 0.072 <sup>b</sup>  | 0.25 (-0.02 , 0.52)              |

Data of variables marked with † are presented as median (inter-quartile range), otherwise as mean (standard deviation)

† Nature log-transformed before subjected to independent t-test

# Cohen's d effect size

<sup>a</sup> P-value testing for differential change at the underlying time point with respect to T1 by using GEE model

<sup>b</sup> Independent t-test

<sup>c</sup> The Cohen's d effect size corresponds to the standardized mean difference of the mean changes at the underlying time point with respect to T1 between the intervention and control groups

1  
2  
3  
4  
5  
6  
7  
8  
9  
10  
11  
12  
13  
14  
15  
16  
17  
18  
19  
20  
21  
22  
23  
24  
25  
26  
27  
28  
29  
30  
31  
32  
33  
34  
35  
36  
37  
38  
39  
40  
41  
42  
43  
44  
45  
46  
47  
48  
49  
50  
51  
52  
53  
54  
55  
56  
57  
58  
59  
60

For peer review only

1  
2  
3  
4  
5  
6  
7  
8  
9  
10  
11  
12  
13  
14  
15  
16  
17  
18  
19  
20  
21  
22  
23  
24  
25  
26  
27  
28  
29  
30  
31  
32  
33  
34  
35  
36  
37  
38  
39  
40  
41  
42  
43  
44  
45  
46  
47  
48  
49  
50  
51  
52  
53  
54  
55  
56  
57  
58  
59  
60

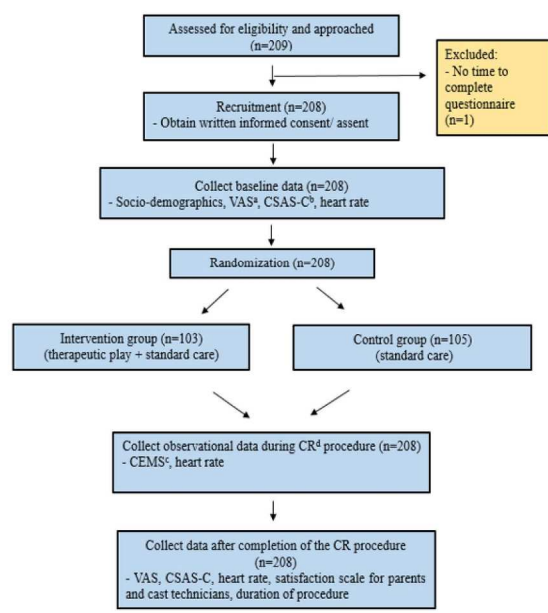

Note:  
<sup>a</sup> VAS: Visual Analogue Scale  
<sup>b</sup> CSAS-C: The short form Chinese version of the State Anxiety Scale for Children  
<sup>c</sup> CEMS: Children's Emotional Manifestation Scale  
<sup>d</sup> CR: Cast-removal

The CONSORT diagram of this study  
 210x297mm (300 x 300 DPI)



1  
2  
3 **Title of proposal:** The stress-reducing effects of therapeutic play on children undergoing cast-  
4 removal procedure.  
5  
6  
7

### 8 **Background**

9  
10 It is common for children to display stressed behaviour in clinical settings, even during painless  
11 medical procedures such as cast-removal. Many behavioural and physiological manifestations of  
12 anxiety in children are associated with their compliance with the medical procedures and thus the  
13 recovery outcomes (Felder-Puig et al., 2003) and the quality of care (Tyson, Bohl, & Blickman,  
14 2014). Researchers (Li, Lopez, & Lee, 2007) has pointed out that lack of self-control and limited  
15 cognitive capabilities are two main factors associated with children's anxiety and that psychosocial  
16 preparation of the children through therapeutic play could help them gain a sense of self-control  
17 and achieve lower anxiety levels.  
18  
19  
20  
21  
22

23 Therapeutic play is a set of structured activities that are designed according to the subject's age,  
24 cognitive development and health-related issues, to promote emotional and physical well-being in  
25 hospitalized children (Vessey & Mahon, 1990). Extensive studies have supported therapeutic play  
26 as an effective pre-operative preparation for both children and parents in reducing fear and anxiety  
27 (Christian, Russ, & Short, 2011; Nyugen, & Thaller, 2008). Care providers should consider the  
28 human rights of children, and provide age-appropriate information to aid understanding of the  
29 disease and the interventions employed.  
30  
31  
32  
33  
34

35 Brewer et al. (2006) evaluated the effectiveness of therapeutic play in a double-blind intervention  
36 study. The findings showed that preparation with role rehearsal and medical play could lower  
37 anxiety levels in children following elective day surgery. Additionally, a recent randomized,  
38 controlled trial (RCT) (Tyson et al., 2014) found that therapeutic play could enhance satisfaction,  
39 not only to children but also in the parents and healthcare providers. However, the efficacy of  
40 therapeutic play are yet to be determined because the reported studies were based mainly on  
41 clinical observations and most of the play manuals, which should have set out specific procedures  
42 and improved fidelity, were not fully described (Brewer et al., 2006; Stevenson et al., 2005; Tyson  
43 et al., 2014). Researchers have emphasized the need for further objective data-gathering studies on  
44 the scope of procedures in an out-patient setting.  
45  
46  
47  
48  
49  
50

51 In summary, the comprehensive value of therapeutic play—in terms of impact on the child, family  
52 and medical institution as a whole—remains largely unexplored in the literature. Our literature  
53 search revealed no reports of prospective and randomized controlled studies of the effectiveness  
54  
55  
56  
57  
58  
59  
60

1  
2  
3 of therapeutic play among Chinese children undergoing cast-removal procedures, let alone among  
4 Hong Kong Chinese.  
5  
6  
7  
8

### 9 **Aims**

10 The aim of this study is to examine the impact of the therapeutic play on the psychological stress  
11 of paediatric patients during cast-removal (CR) procedures in an orthopaedic out-patient clinic in  
12 Hong Kong. The satisfaction ratings of parents and healthcare providers in respect of these services  
13 will also be examined.  
14  
15  
16

### 17 **Methods**

#### 18 **Design**

19 This is a two-arm randomized controlled trial. Eligible children undergoing the CR procedure will  
20 be randomly allocated to either the experimental or control groups in a 1:1 ratio. The child and  
21 accompanying parent in the experimental group will receive therapeutic play intervention, and the  
22 control group will receive routine care only. All participants will be assessed on three occasions:  
23 before, during, and after completion of the CR procedure. Please refer to Figure 1 for the study  
24 protocol.  
25  
26  
27  
28  
29  
30  
31  
32  
33  
34  
35  
36  
37  
38  
39  
40  
41  
42  
43  
44  
45  
46  
47  
48  
49  
50  
51  
52  
53  
54  
55  
56  
57  
58  
59  
60



CR = cast removal

Figure 1. Study Protocol

## Research Hypotheses

The research objectives are to examine whether, in CR procedures, there are significant differences between the Intervention and Control groups in:

1. children's anxiety levels
2. children's emotional distress levels
3. children's heart rates
4. length of procedure
5. satisfaction levels of parents and technicians in respect of the procedures.

## Settings

This study will be conducted in the orthopaedic out-patient department (OPD) of a regional teaching hospital in Hong Kong. A cast room in the OPD performs approximately 20 cast-removal procedures monthly. At the time of this proposal, the standard of regimen in this OPD does not include therapeutic play services. The cast technicians attend to paediatric patients every Wednesday afternoon. They receive limited training on the developmental needs of children in their profession.

## Sample

Children and their accompanying parents, who are waiting for the cast room procedure, will be invited to participate in the study if (i) the children are 3–12 years of age and (ii) the parents are able to speak Cantonese and read Chinese. Children will be excluded if they have had a cast removed within 3 months and demonstrate obvious neurological or developmental problems during cognitive assessment by a play specialist.

The rationale for selecting 3–12-year-old is that the number of children having cast room procedure within this age range in Hong Kong is higher than for other age groups. In fact, according to Piaget's (1963) theory of cognitive development, children from 3 to 7 years of age belong to the same pre-operational stage, while those in the age range 8–12 years belong to the concrete operational stage. In addition, according to Erickson (1963), children in the same age group fall in the same stage of psychosocial development. Accordingly, randomization of participants to the experimental (E) or control (C) groups will be stratified by the two age groups: 3–7 and 8–12 years. Serially numbered opaque sealed envelopes containing the grouping identifier (E or C) for each age group will be prepared in advance by an independent statistician using computer generated random codes. The group allocation of the recruited children will be assigned according to their

ages and sequence of enrolment in the study and the grouping identifier contained in the corresponding numbered envelopes.

The sample size of the study is determined to detect at least a medium effect size of Cohen's  $d = 0.5$  between the experimental and control groups. According to Cohen (1992), 64 subjects in each group will be sufficient to detect a medium effect of 0.5 with 80% power at 5% level of significance. Taking into account of up to a 15% attrition rate and stratified the study by age, seventy-five children each will be recruited for the experimental and control groups per stratum by age (3–7 and 8–12 years).

### **Interventions**

The research team discuss the study protocol and an experienced hospital play specialist (HPS) will conduct all interventions in the study during her regular shift. Each child who is assigned to the Intervention group will receive an initial assessment, who will individualize the therapeutic activities based on children's psycho-cognitive development (Erikson, 1963; Piaget, 1963) and general condition. Duration and type of intervention will be varied, based on the assessment of the child's needs, but will usually be completed within 30 minutes. The content of the therapeutic play has two main components: preparation play and distraction play (Blaine, 1999).

#### **Preparation Play**

Preparation play consisting of two parts of intervention will be conducted before the CR procedure:

##### ***Part I: information given***

The children and parents should be well prepared by information supplied about the procedure and the choices of behaviour management. The hospital jargon were translated into ordinary language and in giving explanations in terms that suit the developmental level of the child (Brown et al., 1997). The preparation phase will be implemented individually, with their parents, in a service room. Information about the procedure will be provided, such as: (i) Why must the procedure be done? (ii) Where will the procedure take place? (iii) What will be happening? and (iv) How will it feel? Multiple coping strategies will also be introduced, so as to allow the parent and child to choose the one appropriate to them (Stephens, Barkey, & Hall, 1999); for example: (i) whether or not to watch the procedure, (ii) to pick something nice to think about and (iii) to sing a song. Choices of age-appropriate toys with specified playing activities will also be given to promote the coping strategies of the children.

##### ***Part II: rehearsal of the procedure***

1  
2  
3 After verbal explanation, a demonstration of the cast-removal procedure will be conducted, using  
4 a doll. Examples of such a demonstration are:  
5  
6  
7

- 8 • Show a dummy circular-saw cast cutter with appropriate sound effect
- 9 • Play with a doll and explain how the cast is cut open by the circular saw
- 10 • Reassure the child that the saw will not cut his or her skin if he or she follows the instruction  
11 not to move
- 12 • Explain that, when the cast is cut, the child may feel vibrations or tingling, feel warmth, and  
13 see chalky dust flying
- 14 • Describe the use of spreaders and scissors to finish removing the cast
- 15 • Explain how, after the cast is open, the child's skin may appear scaly and dirty and the child's  
16 arm or leg may be a little stiff when he or she first tries to move it; also that the arm or leg may  
17 seem light because the cast was heavy.  
18  
19  
20  
21  
22  
23

24 Each child will be asked to role-play how he or she would respond to the procedure after the  
25 demonstration. During the session, parents and children will be encouraged to raise their concerns  
26 or ask any questions about the procedure. The preparation intervention will usually take 10–  
27 15mins to complete.  
28  
29  
30  
31

### 32 **Distraction Play**

33 Support will be given to the children and parents throughout the cast-removal procedure by giving  
34 distraction play intervention. The aim is to focus children's attention away from the medical  
35 procedure. Methods of distraction include visual distraction, auditory distraction, deep breathing  
36 exercises, tactile stimulation, counting/singing or verbal interaction. The choice of the distraction  
37 method the children's choices (Doellman, 2003). Parental presence and involvement will be  
38 supported, and praise will be given to any successful self-control exhibited by the child. The  
39 conclusion of the procedure will be indicated by offering the child a reward (sweets or stickers).  
40  
41  
42  
43  
44

### 45 **Measures**

#### 46 **A visual analogue scale (Appendix I)**

47 A visual analogue scale (VAS) will be used to assess the anxiety levels of children aged 3–7. The  
48 VAS is a 10 cm horizontal line anchored by the words "not worried" (low score) at one end and  
49 "very worried" (high score) at the other, with different facial expressions drawn along the line.  
50 Children aged between 5 and 7 will be asked to indicate their levels of anxiety by moving a pointer  
51 over the line. Accompanying parent(s) will rate the anxiety levels of children aged 3–4, with higher  
52  
53  
54  
55  
56  
57  
58  
59  
60

1  
2  
3 scores indicating greater anxiety. The VAS is a widely used scale which is found to be a reliable  
4 and valid tool for measuring subjective feelings of children aged 5 to 7 (Bringuier *et al.*, 2009).  
5  
6  
7

### 8 **The short form of the Chinese version of the State Anxiety Scale for Children (CSAS-C)** 9 **(Appendix II)**

10 The CSAS-C was a 10-item self-report scale to measure the levels of anxiety among children aged  
11 8-12 in busy clinical settings (Li & Lopez, 2007). The content validity of the scale has been  
12 empirically tested and the Cronbach's alpha value was 0.83. This is a 3-point Likert scale with  
13 total scores ranging from 10 to 30. Higher scores indicate greater anxiety levels (Li & Lopez, 2007).  
14  
15  
16  
17

### 18 **Children's Emotional Manifestation Scale (CEMS) (Appendix III)**

19 The emotional behaviours of children during CR procedures will be documented using the CEMS.  
20 The CEMS was developed by Li and Lopez in 2005. It comprises five observable emotional  
21 behaviours, categorized as 'Facial expression', 'Vocalization', 'Activity', 'Interaction' and 'Level  
22 of Co-operation'. The CEMS score is obtained by reviewing the descriptions of behaviour in each  
23 category and selecting the number that most closely represents the observed behaviour at the time  
24 the subject experiences the most distress. Each category is scored from one to five. Observable  
25 behaviours in each category of the CEMS are explained in detail with an operational definition, so  
26 that the observer, a research nurse (RN) in this study, using this scale has relatively clear-cut  
27 criteria for assessment. The sum of the numbers obtained for each category is the total score, which  
28 will be between 5 and 25. Higher scores indicate the manifestation of more negative (distressed)  
29 emotional behaviours. The evaluation of the psychometric properties of the CEMS demonstrated  
30 adequate inter-rater reliability, high internal consistency, good content validity and excellent  
31 convergent validity (Li & Lopez, 2005).  
32  
33  
34  
35  
36  
37  
38  
39  
40

### 41 **Satisfaction Scale**

42 Two questionnaires in English, developed by Tyson and colleagues (2014), will be adopted to  
43 measure parents' (Appendix IV) and cast technicians' (Appendix V) satisfaction levels. The RN  
44 will work with the research team to translate the English questionnaire into a Chinese version, with  
45 reference to a back-translation method recommended by Brislin (1970).  
46  
47  
48  
49

50 The original questionnaire for the parent is a 10-item scale to measure parents' satisfaction with  
51 the child life services. Each item will be rated by a 5-point scale ranging from 1 = strongly disagree  
52 to 5 = strongly agree. A higher score indicates a higher level of the satisfaction. Examples of the  
53 statements used are 'My child's emotional needs were met' and 'I am satisfied with the care  
54 provided to my child' (Appendix IV). The perception of the cast technician on the service will be  
55  
56  
57  
58  
59  
60



1  
2  
3 examined by eight items, with each being rated on a scale from 1 = strongly disagree to 5 = strongly  
4 agree. Examples of the statements used are ‘The child was co-operative’ and ‘The child engaged  
5 in distraction’ (Appendix V).  
6  
7

### 8 9 **Heart rate monitoring**

10 A standard automatic heart rate monitoring machine, available in the study hospital, will be used  
11 to measure children’s heart rates to assess their physiological responses to CR procedures.  
12 Children’s heart rates have been considered to be objective and definitive indicators for indirect  
13 assessment of anxiety level in children in previous studies (Augustin & Hains 1996; Panda *et al.*  
14 1996; Li & Lopez 2007).  
15  
16  
17  
18

### 19 **A demographic sheet**

20 A questionnaire developed by the research team will be used to measure the socio-demographic  
21 and clinical variables of the parent and their child. The items for children include age, sex, reason  
22 for cast application and number of hospital admissions. The accompany parent’s age, sex,  
23 educational level and working status will also be obtained.  
24  
25  
26  
27

28  
29 The cast technician’s demographic information including age, sex and years of working experience  
30 will also be collected by the RN.  
31  
32

### 33 **Data Collection Procedure**

34 Children having their casts removed will be identified outside the cast room of the study OPD by  
35 the RN. If the child meets the inclusion criteria for recruitment, permission for the child to  
36 participate will be obtained from the accompanying parent. The RN will then conduct the interview  
37 with consenting parent–child pairs in a private room. The children of the consenting parents in  
38 both groups are asked to indicate how anxious they are by filling in either the VAS anxiety scale  
39 (for children between 5–7 years old) or the short form of the CSAS-C (for children aged between  
40 8–12) ( Li & Lopez, 2007). The RN will acquire demographic and clinical data from the parents.  
41 She will also ask the parents of children aged under 5 to use the VAS scale to indicate their child's  
42 perceived anxiety level. Children's heart rates will also be monitored for 1 minute, using a standard  
43 automatic heart rate monitoring machine at the end of the interview.  
44  
45  
46  
47  
48  
49

50 According to the subject allocation scheme, children in the Control group will receive routine care  
51 in the CR room A, whereas those in the Intervention group will additionally receive therapeutic  
52 play intervention conducted by the HPS in the CR room B. The parents and children will be asked  
53 not to discuss the purpose of the study with cast technician in the cast room during the informed  
54 consent process.  
55  
56  
57  
58  
59  
60



In the CR room, the RN will take the 1-minute recording of the child's heart rate when the cast technician starts sawing the cast of the child. The RN will also rate the child's signs of distress from the time the saw touches the cast until the limb is free from the cast, by means of the CEMS (Li & Lopez 2005). The length of the whole CR procedure for each child will also be recorded by the RN. The timing, duration, and nature of play for each child will be documented in a log book. After the completion of the CR procedure, The RN will take the child's heart rate for 1 min and then ask the parents and the cast technician to fill in their respective satisfaction scales to reflect their perceptions of the delivery of the CR procedure.

The RN will give a \$30 dollar coupon to the parent upon completion of data collection.

A pilot study on 5 pairs of eligible parent-child dyad will be performed to assess the feasibility of the data collection plan and to pre-test the questionnaires. The respondents' comments on and impressions of the pilot study will help the research team to refine or revise the study plan (Polit *et al.*, 2013). Please refer to the outline of data collection in Table 1.

**Table 1. The plan of data collection by the research nurse**

|                                                                                                                                                                | Pre-test data upon consent given (T1) | Observational data during procedure (T2) | Post-test data after procedure (T3) |
|----------------------------------------------------------------------------------------------------------------------------------------------------------------|---------------------------------------|------------------------------------------|-------------------------------------|
| Demographic and clinical variables                                                                                                                             | X                                     |                                          |                                     |
| VAS anxiety scale for children 3–7 years old;<br>The short form of the Chinese version of the State Anxiety Scale for Children (CSAS-C) for children aged 8–12 | X                                     |                                          | X                                   |
| Children's Emotional Manifestation Scale                                                                                                                       |                                       | X                                        |                                     |
| 1 minute heart rate recorded by an automatic heart rate monitoring machine.                                                                                    | X                                     | X                                        | X                                   |
| Parent satisfaction scale                                                                                                                                      |                                       |                                          | X                                   |
| Staff satisfaction scale                                                                                                                                       |                                       |                                          | X                                   |

|                     |  |   |  |
|---------------------|--|---|--|
| Length of procedure |  | X |  |
|---------------------|--|---|--|

### Data Analysis

All data will be analysed using IBM SPSS for Windows, Version 22. Descriptive statistics such as mean, standard deviation, median, inter-quartile range, frequency and percentage, as appropriate, will be used to present the participants' socio-demographics and outcome measurements. Pearson's chi-squared test and student's *t*-test will be used as appropriate for comparing the baseline differences between the two groups. Generalized estimating equations (GEE) model will be used to compare the outcome measures across time between the two groups. GEE model can account for intra-correlated repeated measures data and accommodated missing data, provided the data are missing at random. All statistical analyses are two-sided and level of significance will be set at 0.05.

### Ethical Issues

Ethical approval will be sought from the Ethical Committees of the University and the study hospital prior to conducting the study. The purpose and details of the study will be clearly provided to the accompanying parents before the RN obtains their written consent. Maintenance of confidentiality and anonymity of data gained will also be assured. Participants will be informed that the quality of care will not be affected by their participation status. Please refer to the details of the information sheet and consent form in Appendix VII.

### Timeline

#### Timetable of the 20-month project

| Month                                    | 1 | 2 | 3 | 4-16 |   |   |   | 17 | 18 | 19 | 20 |
|------------------------------------------|---|---|---|------|---|---|---|----|----|----|----|
| RN training & literature review          | ★ | ★ |   |      |   |   |   |    |    |    |    |
| Questionnaires development & pilot study |   | ★ | ★ |      |   |   |   |    |    |    |    |
| Data collection                          |   |   |   | ★    | ★ | ★ | ★ | ★  | ★  |    |    |
| Data entry & data analyses               |   |   |   |      |   |   |   | ★  | ★  | ★  |    |
| Report writing                           |   |   |   |      |   |   |   |    |    | ★  | ★  |

Note: Based on recruiting 20 cases per month

### Significance

Removal of casts is a frightening procedure for children (Johnson et al., 1975), and studies on psychosocial care for children receiving the procedure are limited. This is the first study of this kind among Hong Kong Chinese children in an orthopaedic out-patient clinic. The findings will inform policy makers on the development and inclusion of therapeutic play interventions in paediatric out-patient healthcare settings.

For peer review only

## References

- Augustin, P. & Hains, A. A. (1996). Effect of music on ambulatory surgery patients' pre-operative anxiety. *AORN Journal* 63, (750),753–58.
- Blaine, S. (1999). The where, why, and how: Coping kits and distraction techniques. *Child Life Focus*, 1, 1–6.
- Brewer, S., Gleditsch, S. L., Syblik, D., Tietjens, M, E., & Vacik, H. W. (2006). Pediatric anxiety: child life intervention in day surgery. *Journal of Pediatric Nursing*, 21(1), 13–22.
- Bringuier, S., Dadure, C., Raux, O., Dubois, A., Picot, M. C., & Capdevila, X. (2009). The perioperative validity of the visual analogue anxiety scale in children: a discriminant and useful instrument in routine clinical practice to optimize post-operative pain management. *Anesthesia & Analgesia*, 109(3), 737–744.
- Brislin, R. W. (1986). The wording and translation of research instrument. In W. J. Lonner & J. W. Berry (Eds.). *Field methods in cross-cultural research*. (pp. 137-164). Beverly Hills, CA.: Sage.
- Brown C., Wilson, J. (1997). *Guidelines for the Development of Child Life Programs* (2<sup>nd</sup> ed). Rockville, MD, USA: Child Life Council, Inc.
- Christian, K. M., Russ, S., & Short, E. J. (2011). Pretend play processes and anxiety: Considerations for the play therapist. *International Journal of Play Therapy*, 20(4), 179–192.
- Doellman, D. (2003). Pharmacological versus nonpharmacological techniques in reducing venipuncture psychological trauma in paediatric patients. *Journal of Infusion Nursing*, 26(2), 103–109.
- Erikson, E. (1963). *Childhood and society* (2nd ed.). New York: Norton & Company.
- Felder-Puig R., Maksys A., Noestlinger C., Gadner, H., Stark, H., Pfluegler, A., & Topf. R. (2003). Using a children's book to prepare children and parents for elective ENT surgery: Results of a randomized clinical trial. *International Journal of Pediatric Otorhinolaryngology*, 67, 35–41.
- Johnson, P. A. & Stockdate, D. F (1975). Effects of puppet therapy on palmar sweating of hospitalized children. *Johns Hopkins Medical Journal*, 137, 1–5.
- Li, H. C. W., & Lopez, V. (2005). Children's Emotional Manifestation Scale: development testing. *Journal of Clinical Nursing*, 14(2), 223–229.

- 1  
2  
3 Li, H. C. W., & Lopez, V. (2007). Development and validation of a short form of the Chinese  
4 version of the State Anxiety Scale for Children. *International Journal of Nursing Studies*,  
5 44(4), 566–573.  
6  
7  
8 Li, H. C., Lopez, V., & Lee, T. L. (2007). Effects of pre-operative therapeutic play on outcomes  
9 of school-age children undergoing day surgery. *Research in Nursing & Health*, 30(3), 320-  
10 332.  
11  
12  
13 Panda, N., Bajaj, A., Pershad, D. Yaddanapudi, L. N. & Chari, P. (1996). Pre-operative anxiety:  
14 effect of early or late position on the operating list. *Anaesthesia*, 51(4), 344–346.  
15  
16  
17 Piaget, J. (1963). *The origins of intelligence in children*. New York: Norton.  
18  
19 Polit, D. F. & Beck, C. T. (2013). *Essentials of nursing research: Appraising evidence for nursing*  
20 *practice*. (8th ed.). Philadelphia: Lippincott Williams & Wilkins.  
21  
22 Stephens, B., Barkey, M., & Hall, H. (1999). Techniques to comfort children during stressful  
23 procedures. *Advances in Mind-Body Medicine*, 15, 49–60.  
24  
25  
26 Stevenson, M. D., Bivins, C. M., O'Brien, K., & Gonzalez del Rey, J. A. (2005). Child life  
27 intervention during angiocatheter insertion in the paediatric emergency department. *Pediatric*  
28 *Emergency Care*, 21(11), 712–718.  
29  
30  
31 Nyugen, T. J., & Thaller, S. (2008). Psychological rehabilitation of paediatric burn  
32 patients. *Journal of Craniofacial Surgery*, 19(4), 882–87.  
33  
34  
35 Tyson, M. E., Bohl, D. D., & Blickman, J. G. (2014). *A randomized controlled trial: Child life*  
36 *services in paediatric imaging*. Springer-Verlag.  
37  
38  
39 Vessey, J. A., & Mahon, M. M. (1990). Therapeutic play and the hospitalised child. *Journal of*  
40 *Pediatric Nursing*, 5(5), 328–333.  
41  
42  
43  
44  
45  
46  
47  
48  
49  
50  
51  
52  
53  
54  
55  
56  
57  
58  
59  
60

1  
2  
3  
4  
5  
6  
7  
8  
9  
10  
11  
12  
13  
14  
15  
16  
17  
18  
19  
20  
21  
22  
23  
24  
25  
26  
27  
28  
29  
30  
31  
32  
33  
34  
35  
36  
37  
38  
39  
40  
41  
42  
43  
44  
45  
46  
47  
48  
49  
50  
51  
52  
53  
54  
55  
56  
57  
58  
59  
60

### Appendix I

#### A 10-point level Visual Analogue Scale (VAS)

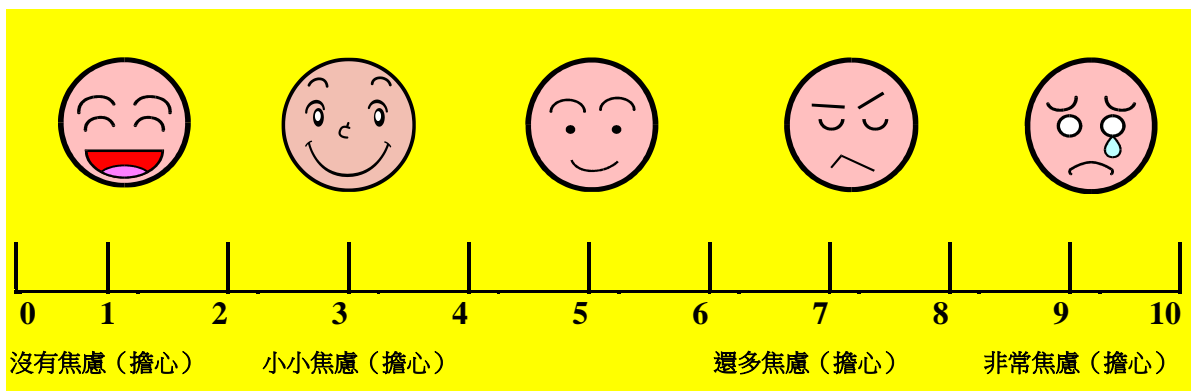

peer review only

## Appendix II

### Short-Form of the Chinese version of the State Anxiety Scale

以下是一些男孩子和女孩子用來形容自己的句子。請小心閱讀每一句，然後在每句子的右方圈出最能表達你現時感覺的字句。答案是沒有分對或錯的。不要花太多時間在任何句子上，只要將最能表達你現時感覺的字句圈出來就可以了。

- |              |      |    |     |
|--------------|------|----|-----|
| 1. 我感到.....  | 十分愉快 | 愉快 | 不愉快 |
| 2. 我感到.....  | 十分不安 | 不安 | 無不安 |
| 3. 我感到.....  | 十分緊張 | 緊張 | 不緊張 |
| 4. 我感到.....  | 十分平靜 | 平靜 | 不平靜 |
| 5. 我感到.....  | 十分輕鬆 | 輕鬆 | 不輕鬆 |
| 6. 我感到.....  | 十分擔心 | 擔心 | 不擔心 |
| 7. 我感到.....  | 十分害怕 | 害怕 | 不害怕 |
| 8. 我感到.....  | 十分快樂 | 快樂 | 不快樂 |
| 9. 我感到.....  | 十分煩惱 | 煩惱 | 不煩惱 |
| 10. 我感到..... | 十分開心 | 開心 | 不開心 |

----- 此問卷到此完 -----

## Appendix 3

## The Children Emotional Manifestation Scale

|                              | 1                                                                                 | 2                                                                                 | 3                                                                                 | 4                                                                                  | 5                                                                                   | Scored |
|------------------------------|-----------------------------------------------------------------------------------|-----------------------------------------------------------------------------------|-----------------------------------------------------------------------------------|------------------------------------------------------------------------------------|-------------------------------------------------------------------------------------|--------|
| <b>Facial Expression</b>     |  |  |  |  |  |        |
| <b>Vocalization</b>          | No Crying                                                                         | Watery eyes                                                                       | Whimpering                                                                        | Crying                                                                             | Hard Crying or Non-stop Screaming                                                   |        |
| <b>Activity</b>              | Calm                                                                              | Annoying                                                                          | Irritable                                                                         | Restlessness                                                                       | Agitation                                                                           |        |
| <b>Interaction</b>           | Verbal interaction                                                                | Non-verbal response only                                                          | Avoid interaction                                                                 | Mild verbal protest                                                                | Strong verbal protest                                                               |        |
| <b>Level of Co-operation</b> | Active participation                                                              | Passive participation                                                             | Withdrawal                                                                        | Extreme resistance                                                                 | Disruptive behaviour                                                                |        |



## Appendix IV

## Parent Satisfaction Scale (Chinese version)

## 家長滿意程度調查

香港中文大學現在正進行一項關於拆除石膏程序的研究，希望了解病人家屬和職員對這項服務的滿意程度。以下是關於剛才拆除石膏過程的相關問題，請為每條問題圈出符合你的同意程度的號碼。答案純屬個人意見，沒有標準答案。

(1 = 非常不同意；5 = 非常同意)

|    |                      | 非常不同意 | 不同意 | 中立 | 同意 | 非常同意 |
|----|----------------------|-------|-----|----|----|------|
| 1  | 整個程序用了我的孩子能明白的語言去講解。 | 1     | 2   | 3  | 4  | 5    |
| 2  | 我孩子的情緒有被照顧到。         | 1     | 2   | 3  | 4  | 5    |
| 3  | 職員有關顧到我的孩子是否感到舒適。    | 1     | 2   | 3  | 4  | 5    |
| 4  | 我知道要怎樣去幫助我的孩子。       | 1     | 2   | 3  | 4  | 5    |
| 5  | 職員有關顧到我的疑問和憂慮。       | 1     | 2   | 3  | 4  | 5    |
| 6  | 職員尊重我對我孩子的理解。        | 1     | 2   | 3  | 4  | 5    |
| 7  | 我對我孩子所受到的照顧感到滿意。     | 1     | 2   | 3  | 4  | 5    |
| 8  | 我會推薦這個服務給其他人。        | 1     | 2   | 3  | 4  | 5    |
| 9  | 職員都是友善和樂於幫忙的。        | 1     | 2   | 3  | 4  | 5    |
| 10 | 職員們好好地共同合作去照顧我的孩子。   | 1     | 2   | 3  | 4  | 5    |

### Parent Satisfaction Scale

These are the questions in regards to the process of pop removal, please rate each question on scale 1-5

|    |                                                                        | <b>STRONGLY<br/>DISAGREE</b> | <b>DIS-<br/>AGREE</b> | <b>NEITHER<br/>AGREE<br/>NOR<br/>DISAGREE</b> | <b>AGREE</b> | <b>STRONGLY<br/>AGREE</b> |
|----|------------------------------------------------------------------------|------------------------------|-----------------------|-----------------------------------------------|--------------|---------------------------|
| 1  | Appropriate wordings was used to let my kid to understand the process. | 1                            | 2                     | 3                                             | 4            | 5                         |
| 2  | My kid's emotion was looked well after by the team.                    | 1                            | 2                     | 3                                             | 4            | 5                         |
| 3  | Staff concerned about the comfortability of my kid.                    | 1                            | 2                     | 3                                             | 4            | 5                         |
| 4  | I knew how to assist with my kid.                                      | 1                            | 2                     | 3                                             | 4            | 5                         |
| 5  | Staff concerned about my questions and worries.                        | 1                            | 2                     | 3                                             | 4            | 5                         |
| 6  | Staff respect my knowledge to my kid.                                  | 1                            | 2                     | 3                                             | 4            | 5                         |
| 7  | I satisfied with the care received from the team.                      | 1                            | 2                     | 3                                             | 4            | 5                         |
| 8  | I would recommend this hospital to others.                             | 1                            | 2                     | 3                                             | 4            | 5                         |
| 9  | Staff were friendly and willing to help.                               | 1                            | 2                     | 3                                             | 4            | 5                         |
| 10 | Staff cooperated well to care my kid.                                  | 1                            | 2                     | 3                                             | 4            | 5                         |

**Appendix IV**  
**Staff Satisfaction Scale (Chinese version)**  
**職員滿意程度調查**

香港中文大學現在正進行一項關於拆除石膏程序的研究，希望了解病人家屬和職員對這項服務的滿意程度。以下是關於剛才拆除石膏過程的相關問題，請為每條問題圈出符合你的同意程度的號碼。答案純屬個人意見，沒有標準答案。

(1 = 非常不同意；5 = 非常同意)

|   |                       | 非常不同意 | 不同意 | 中立 | 同意 | 非常同意 |
|---|-----------------------|-------|-----|----|----|------|
| 1 | 孩子明白到甚麼事情將會發生。        | 1     | 2   | 3  | 4  | 5    |
| 2 | 孩子表現得合作。              | 1     | 2   | 3  | 4  | 5    |
| 3 | 孩子的情緒有被照顧到。           | 1     | 2   | 3  | 4  | 5    |
| 4 | 孩子的注意力已被分散。           | 1     | 2   | 3  | 4  | 5    |
| 5 | 家長明白怎樣去幫助他們的孩子。       | 1     | 2   | 3  | 4  | 5    |
| 6 | 進行拆除石膏程序的環境符合孩子的需要。   | 1     | 2   | 3  | 4  | 5    |
| 7 | 我對我們團隊所供給這個孩子的照顧感到滿意。 | 1     | 2   | 3  | 4  | 5    |
| 8 | 家人對於孩子所受到的照顧感到滿意。     | 1     | 2   | 3  | 4  | 5    |

### Staff Satisfaction Scale

These are the questions in regards to the process of pop removal, please rate each question on scale 1-5

|   |                                                               | <b>STRONGLY<br/>DISAGREE</b> | <b>DISAGREE</b> | <b>NEITHER<br/>AGREE<br/>NOR<br/>DISAGREE</b> | <b>AGREE</b> | <b>STRONGLY<br/>AGREE</b> |
|---|---------------------------------------------------------------|------------------------------|-----------------|-----------------------------------------------|--------------|---------------------------|
| 1 | The kid understood what would happen next.                    | 1                            | 2               | 3                                             | 4            | 5                         |
| 2 | The kin was cooperative.                                      | 1                            | 2               | 3                                             | 4            | 5                         |
| 3 | The kid's emotion was looked well after by the team.          | 1                            | 2               | 3                                             | 4            | 5                         |
| 4 | The kid was distracted.                                       | 1                            | 2               | 3                                             | 4            | 5                         |
| 5 | Parents knew how to help with their kids                      | 1                            | 2               | 3                                             | 4            | 5                         |
| 6 | The venue for POP removal was appropriate to kids' needs      | 1                            | 2               | 3                                             | 4            | 5                         |
| 7 | I am satisfied with the cared provided to the kid.            | 1                            | 2               | 3                                             | 4            | 5                         |
| 8 | Kid's family was satisfied with the care received by the kid. | 1                            | 2               | 3                                             | 4            | 5                         |

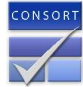

## CONSORT 2010 checklist of information to include when reporting a randomised trial\*

| Section/Topic                    | Item No | Checklist item                                                                                                                                                                              | Reported on page No |
|----------------------------------|---------|---------------------------------------------------------------------------------------------------------------------------------------------------------------------------------------------|---------------------|
| <b>Title and abstract</b>        |         |                                                                                                                                                                                             |                     |
|                                  | 1a      | Identification as a randomised trial in the title                                                                                                                                           | 1                   |
|                                  | 1b      | Structured summary of trial design, methods, results, and conclusions (for specific guidance see CONSORT for abstracts)                                                                     | 4                   |
| <b>Introduction</b>              |         |                                                                                                                                                                                             |                     |
| Background and objectives        | 2a      | Scientific background and explanation of rationale                                                                                                                                          | 6                   |
|                                  | 2b      | Specific objectives or hypotheses                                                                                                                                                           | 7                   |
| <b>Methods</b>                   |         |                                                                                                                                                                                             |                     |
| Trial design                     | 3a      | Description of trial design (such as parallel, factorial) including allocation ratio                                                                                                        | 8                   |
|                                  | 3b      | Important changes to methods after trial commencement (such as eligibility criteria), with reasons                                                                                          | N/A                 |
| Participants                     | 4a      | Eligibility criteria for participants                                                                                                                                                       | 8                   |
|                                  | 4b      | Settings and locations where the data were collected                                                                                                                                        | 8                   |
| Interventions                    | 5       | The interventions for each group with sufficient details to allow replication, including how and when they were actually administered                                                       | 10                  |
| Outcomes                         | 6a      | Completely defined pre-specified primary and secondary outcome measures, including how and when they were assessed                                                                          | 11-13               |
|                                  | 6b      | Any changes to trial outcomes after the trial commenced, with reasons                                                                                                                       | N/A                 |
| Sample size                      | 7a      | How sample size was determined                                                                                                                                                              | 9                   |
|                                  | 7b      | When applicable, explanation of any interim analyses and stopping guidelines                                                                                                                | N/A                 |
| <b>Randomisation:</b>            |         |                                                                                                                                                                                             |                     |
| Sequence generation              | 8a      | Method used to generate the random allocation sequence                                                                                                                                      | 9                   |
|                                  | 8b      | Type of randomisation; details of any restriction (such as blocking and block size)                                                                                                         | 9                   |
| Allocation concealment mechanism | 9       | Mechanism used to implement the random allocation sequence (such as sequentially numbered containers), describing any steps taken to conceal the sequence until interventions were assigned | 9                   |
| Implementation                   | 10      | Who generated the random allocation sequence, who enrolled participants, and who assigned participants to interventions                                                                     | 9                   |
| Blinding                         | 11a     | If done, who was blinded after assignment to interventions (for example, participants, care providers, those                                                                                | 21                  |

|    |                          |                                                                                                                     |         |
|----|--------------------------|---------------------------------------------------------------------------------------------------------------------|---------|
| 1  |                          |                                                                                                                     |         |
| 2  |                          | assessing outcomes) and how                                                                                         |         |
| 3  |                          |                                                                                                                     |         |
| 4  |                          | 11b If relevant, description of the similarity of interventions                                                     | 7       |
| 5  | Statistical methods      | 12a Statistical methods used to compare groups for primary and secondary outcomes                                   | 15      |
| 6  |                          | 12b Methods for additional analyses, such as subgroup analyses and adjusted analyses                                | NA      |
| 7  |                          |                                                                                                                     |         |
| 8  | <b>Results</b>           |                                                                                                                     |         |
| 9  | Participant flow (a      | 13a For each group, the numbers of participants who were randomly assigned, received intended treatment, and        | 16      |
| 10 | diagram is strongly      | were analysed for the primary outcome                                                                               |         |
| 11 | recommended)             | 13b For each group, losses and exclusions after randomisation, together with reasons                                | 16      |
| 12 | Recruitment              | 14a Dates defining the periods of recruitment and follow-up                                                         | 16      |
| 13 |                          | 14b Why the trial ended or was stopped                                                                              | NA      |
| 14 | Baseline data            | 15 A table showing baseline demographic and clinical characteristics for each group                                 | Table 1 |
| 15 | Numbers analysed         | 16 For each group, number of participants (denominator) included in each analysis and whether the analysis was      | 16      |
| 16 |                          | by original assigned groups                                                                                         |         |
| 17 |                          |                                                                                                                     |         |
| 18 | Outcomes and             | 17a For each primary and secondary outcome, results for each group, and the estimated effect size and its           | 16      |
| 19 | estimation               | precision (such as 95% confidence interval)                                                                         |         |
| 20 |                          | 17b For binary outcomes, presentation of both absolute and relative effect sizes is recommended                     | NA      |
| 21 | Ancillary analyses       | 18 Results of any other analyses performed, including subgroup analyses and adjusted analyses, distinguishing       | NA      |
| 22 |                          | pre-specified from exploratory                                                                                      |         |
| 23 |                          |                                                                                                                     |         |
| 24 | Harms                    | 19 All important harms or unintended effects in each group (for specific guidance see CONSORT for harms)            | NA      |
| 25 |                          |                                                                                                                     |         |
| 26 | <b>Discussion</b>        |                                                                                                                     |         |
| 27 | Limitations              | 20 Trial limitations, addressing sources of potential bias, imprecision, and, if relevant, multiplicity of analyses | 20      |
| 28 | Generalisability         | 21 Generalisability (external validity, applicability) of the trial findings                                        | 20      |
| 29 | Interpretation           | 22 Interpretation consistent with results, balancing benefits and harms, and considering other relevant evidence    | 19      |
| 30 |                          |                                                                                                                     |         |
| 31 | <b>Other information</b> |                                                                                                                     |         |
| 32 | Registration             | 23 Registration number and name of trial registry                                                                   | 5       |
| 33 | Protocol                 | 24 Where the full trial protocol can be accessed, if available                                                      | 22      |
| 34 | Funding                  | 25 Sources of funding and other support (such as supply of drugs), role of funders                                  |         |
| 35 |                          |                                                                                                                     |         |

36

37 \*We strongly recommend reading this statement in conjunction with the CONSORT 2010 Explanation and Elaboration for important clarifications on all the items. If relevant, we also

38 recommend reading CONSORT extensions for cluster randomised trials, non-inferiority and equivalence trials, non-pharmacological treatments, herbal interventions, and pragmatic trials.

39 Additional extensions are forthcoming: for those and for up to date references relevant to this checklist, see [www.consort-statement.org](http://www.consort-statement.org).

40

41
